# Supplementary material for: Mechanistic elucidation guided by covalent inhibitors for the development of anti-diabetic PPARγ ligands
Source: PubMed Central journal article supplement (PMC6021786; doi:10.1039/c6sc01279e), 2016-05-13

<Supporting Information>

## Mechanistic Elucidation Guided by Covalent Inhibitors for the Development of Anti-diabetic PPAR $\gamma$ Ligands

Hwan Bae,<sup>a</sup> Jun Young Jang,<sup>a</sup> Sun-Sil Choi,<sup>b</sup> Jae-Jin Lee,<sup>c</sup> Heejun Kim,<sup>a</sup> Ala Jo,<sup>a</sup>

Kong-Joo Lee,<sup>c</sup> Jang Hyun Choi,<sup>b</sup> Se Won Suh,<sup>a,d</sup> and Seung Bum Park<sup>\*,a,d</sup>

<sup>a</sup>Department of Chemistry, Seoul National University, Seoul, 151-747, Korea

<sup>b</sup>Department of Biological Science, Ulsan National Institute of Science and Technology,  
Ulsan, 689-798, Korea

<sup>c</sup>Graduate School of Pharmaceutical Sciences and College of Pharmacy, Ewha Womans  
University, Seoul 120-750, Korea

<sup>d</sup>Department of Biophysics and Chemical Biology, Seoul National University, Seoul, 151-  
747, Korea

\*e-mail: [sbpark@snu.ac.kr](mailto:sbpark@snu.ac.kr)

### Content

|                                                        |     |
|--------------------------------------------------------|-----|
| 1. Supplementary Figures.....                          | S2  |
| 2. Supplementary Tables.....                           | S11 |
| 3. Biochemical Procedures.....                         | S14 |
| 4. Crystallography.....                                | S18 |
| 5. <i>In vivo</i> studies.....                         | S20 |
| 6. Chemical Synthesis.....                             | S21 |
| 7. Supplementary References.....                       | S41 |
| 8. <sup>1</sup> H and <sup>13</sup> C NMR spectra..... | S42 |

## 1. Supplementary Figures

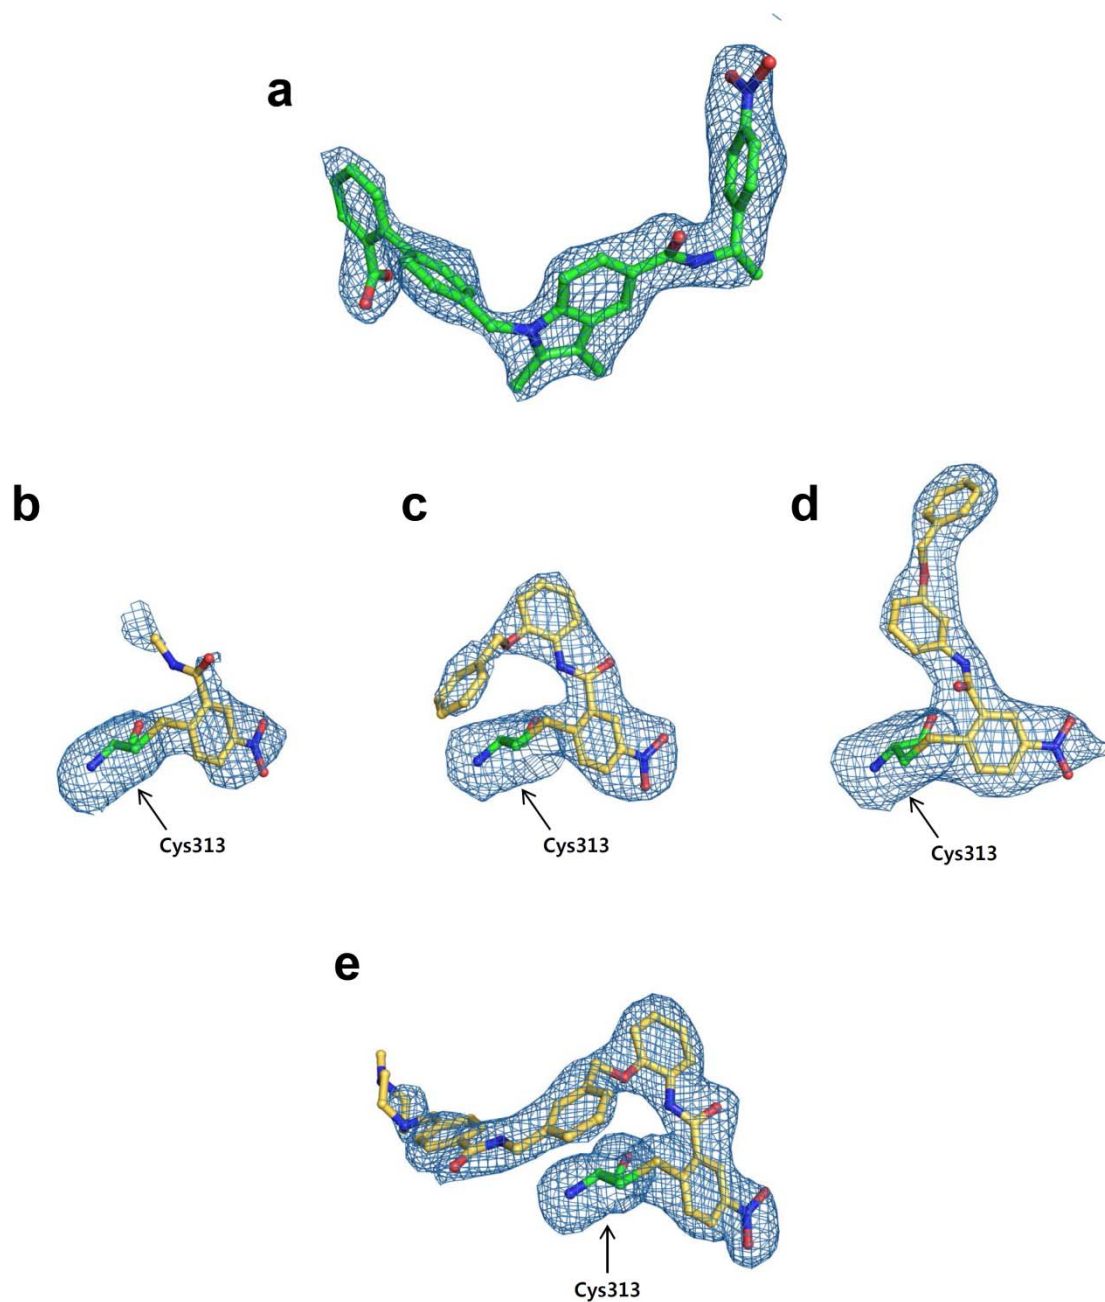

**Fig. S1. Electron density maps for compounds.** Electron density is shown from the  $F_o-F_c$  omit maps (contoured at  $2.5\sigma$ ). (a) SR1664 (PDB: 5DWL). (b) SB1404 (PDB: 5DV6). (c) SB1405 (PDB: 5DV3). (d) SB1406 (PDB: 5DSH). (e) SB1453 (PDB: 5DVC).

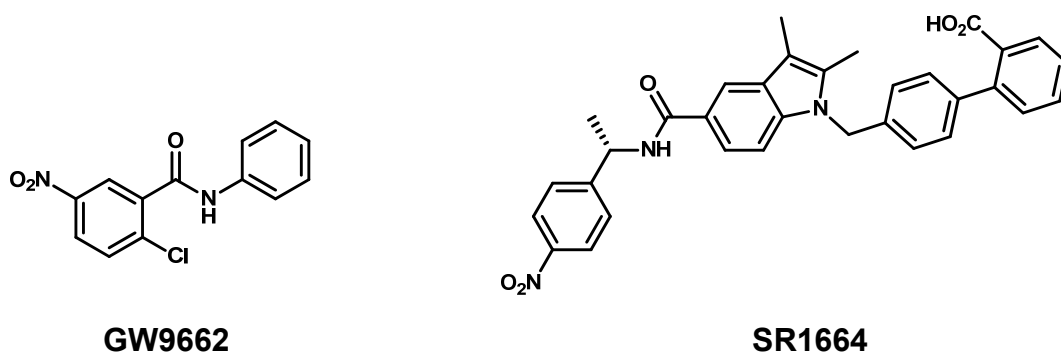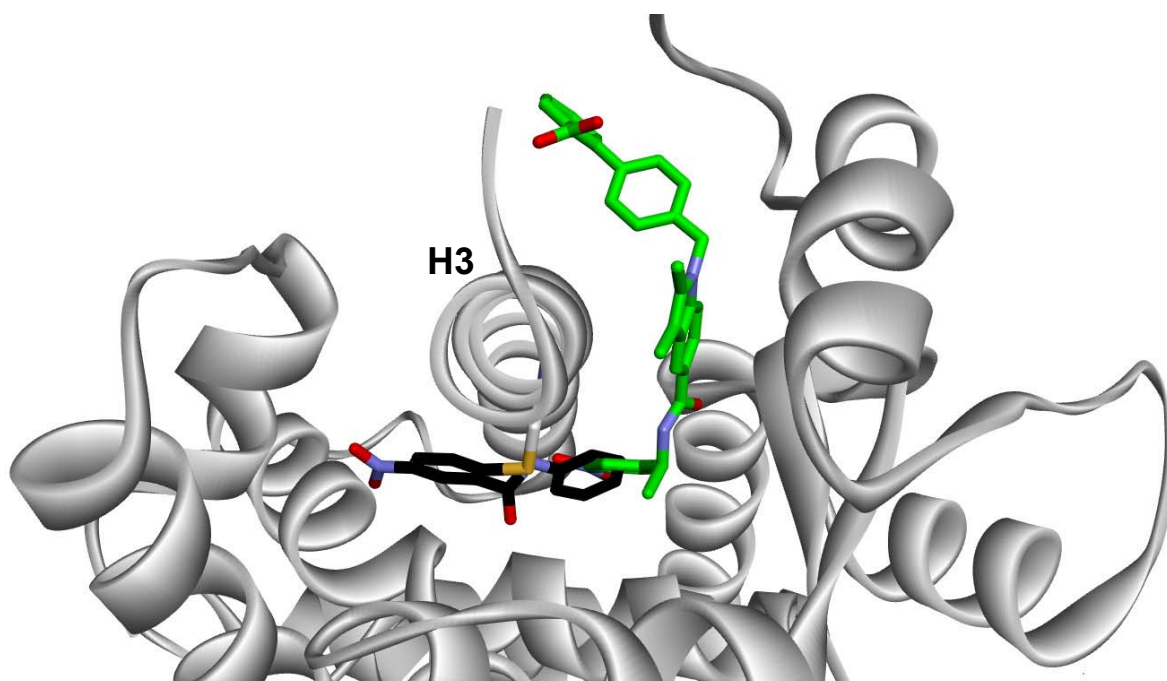

**Fig. S2. Alignment of the SR1664–PPAR $\gamma$  LBD and GW9662–PPAR $\gamma$  LBD (PDB: 3B0R) X-ray co-crystal structures. SR1664 (green) exhibits a steric clash with phenyl group of GW9662 (black) which is covalently bound to Cys313 on H3 of PPAR $\gamma$ .**

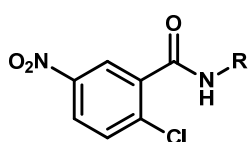

R = phenyl ► GW9662

R = methyl ► SB1404

2-chloro-5-nitrobenzamide

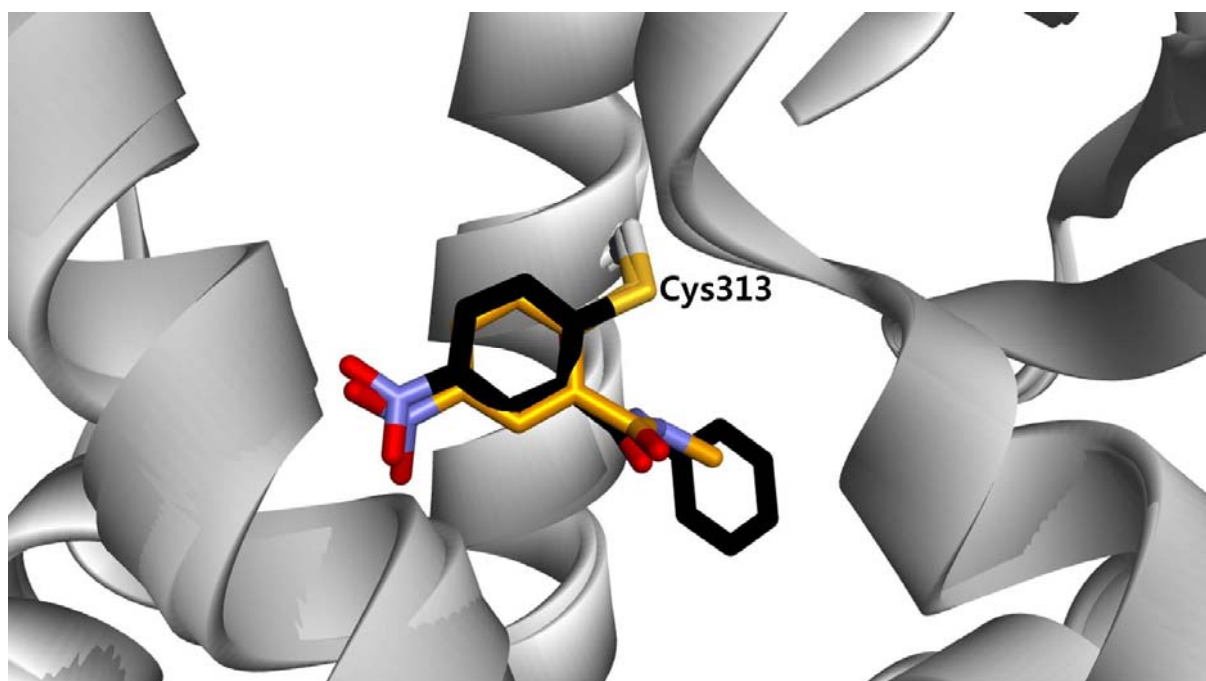

**Fig. S3. Alignment of the SB1404–PPAR $\gamma$  LBD and GW9662–PPAR $\gamma$  LBD (PDB: 3B0R) X-ray co-crystal structures.** Like GW9662 (black), SB1404 (orange) makes covalent bonding with Cys313 on H3 of PPAR $\gamma$ , indicating that 2-chloro-5-nitrobenzamide moiety can serve as an electrophile and covalently trap Cys313 regardless of functional groups attached to amide.

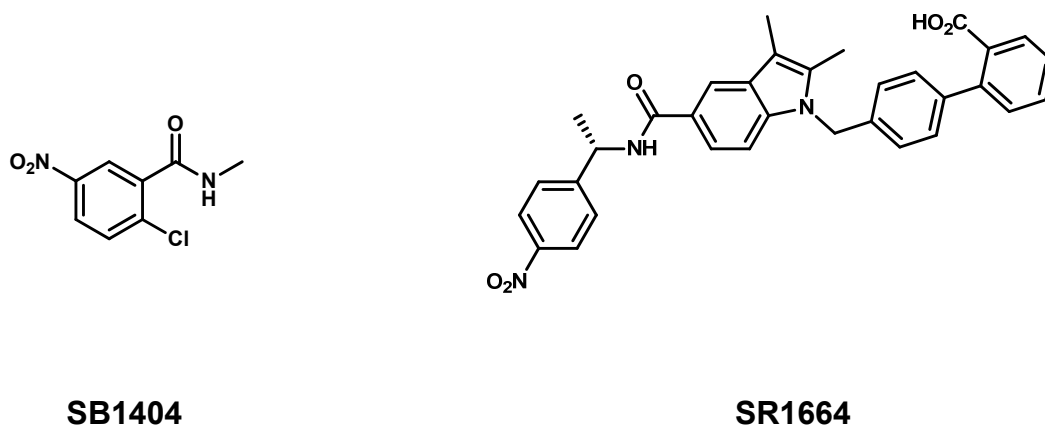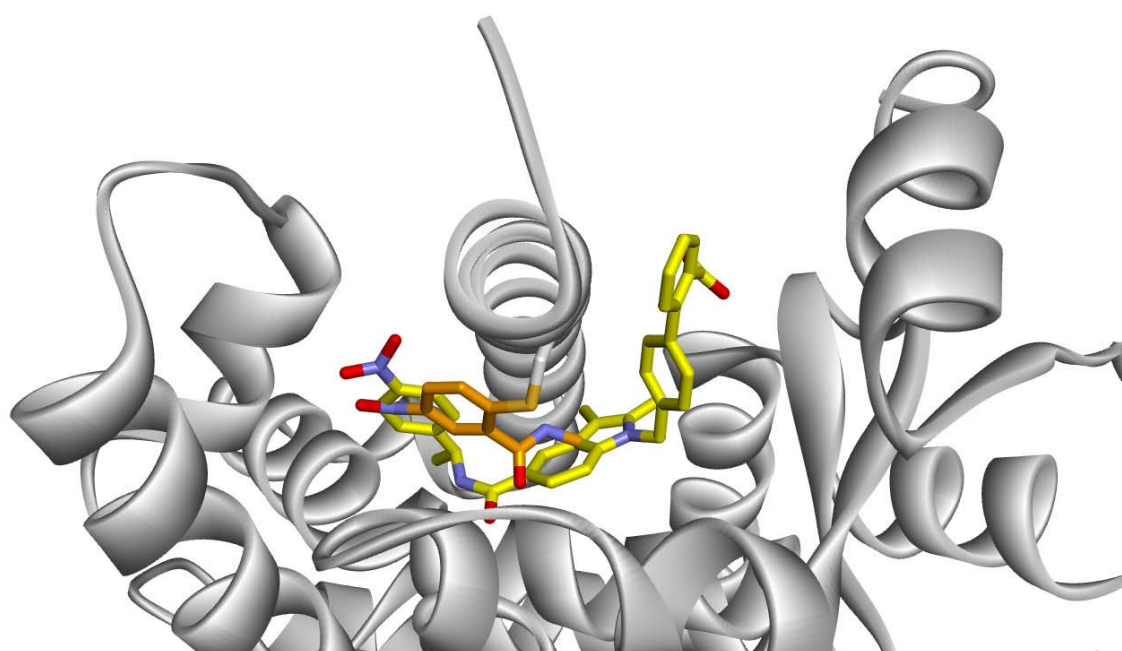

**Fig. S4. Alignment of the previously reported SR1664–PPAR $\gamma$  LBD (PDB: 4R2U) and SB1404–PPAR $\gamma$  LBD X-ray co-crystal structures.** SR1664 (yellow) overlaps with SB1404 (orange) complexed with PPAR $\gamma$  LBD, indicating SR1664 cannot coexist with SB1404 in the canonical binding pocket of PPAR $\gamma$  through the previously reported binding mode [*Nat. Comm.* **2015** (Ref. 15)] .

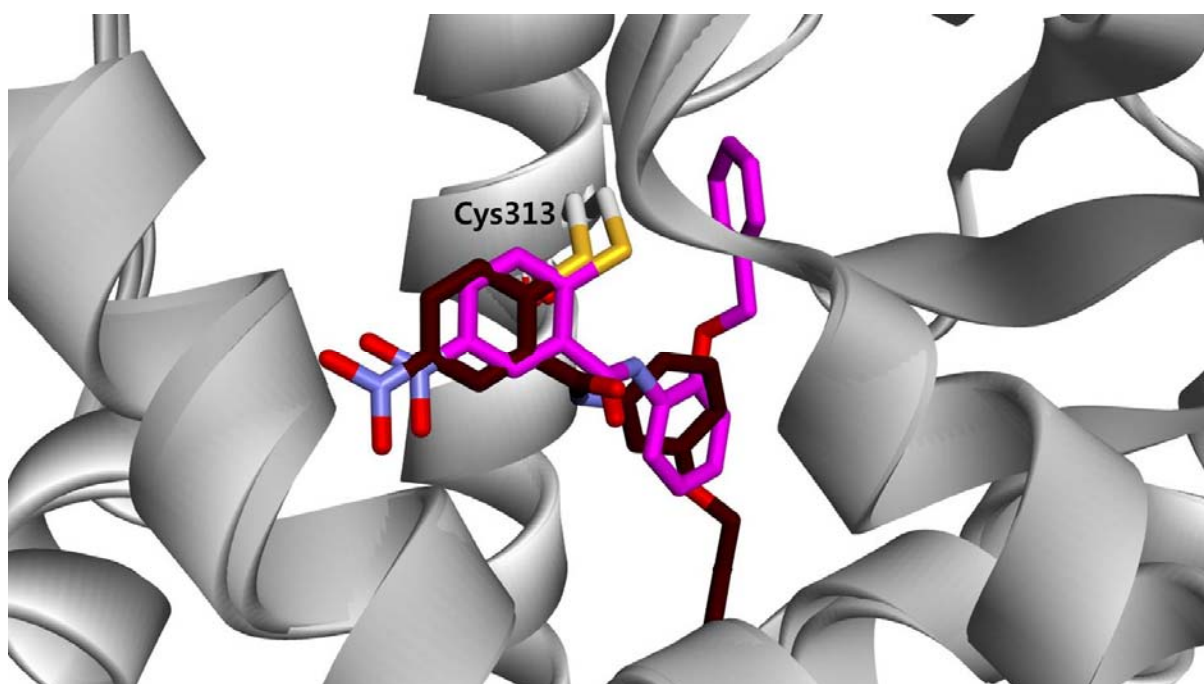

**Fig. S5. Alignment of the SB1405–PPAR $\gamma$  LBD and SB1406–PPAR $\gamma$  LBD X-ray co-crystal structures.** Both SB1405 (pink) and SB1406 (brown) covalently bind to Cys313 on H3 of PPAR $\gamma$ , but they have different binding modes.

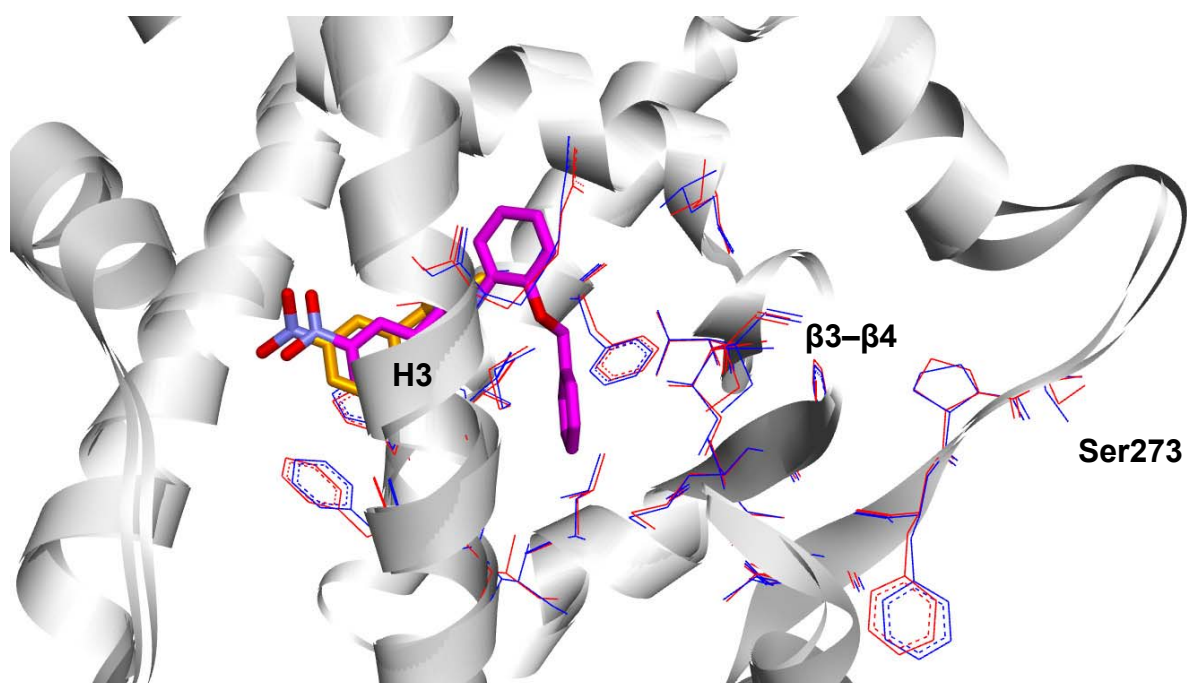

**Fig. S6. Alignment of the SB1404–PPAR $\gamma$  LBD and SB1405–PPAR $\gamma$  LBD X-ray co-crystal structures.** There is no significant difference between residues' positioning of SB1404–PPAR $\gamma$  LBD co-crystal structure (red) and that of SB1405–PPAR $\gamma$  LBD co-crystal structure (blue) around the specific binding site.



| Sequence                | Start | End | SB1404 |      |       |       |       | SB1405 |       |       |       |       | MHP   | CS    |           |      |
|-------------------------|-------|-----|--------|------|-------|-------|-------|--------|-------|-------|-------|-------|-------|-------|-----------|------|
|                         |       |     | 10s    | 60s  | 300s  | 1800s | 7200s | mean   | 10s   | 60s   | 300s  | 1800s |       |       | 7200s     | mean |
| AEISSDIDQLNPESADL       | 223   | 239 | 0.0    | 0.0  | 0.0   | 0.0   | 0.0   | 0.0    | 0.0   | 0.0   | 0.0   | 0.0   | 0.0   | 0.0   | 1815.8152 | 2    |
| ISSDIDQLNPESADL         | 225   | 239 | 0.0    | 0.0  | 0.0   | 0.0   | 0.0   | 0.0    | 0.0   | 0.0   | 0.0   | 0.0   | 0.0   | 0.0   | 1615.7554 | 2    |
| ISSDIDQLNPESADLRA       | 225   | 241 | 0.0    | 0.0  | 0.0   | 0.0   | 0.0   | 0.0    | 0.0   | 0.0   | 0.0   | 0.0   | 0.0   | 0.0   | 1842.8878 | 2    |
| PESADL                  | 234   | 239 | 0.0    | 0.0  | 0.0   | 0.0   | 0.0   | 0.0    | 0.0   | 0.0   | 0.0   | 0.0   | 0.0   | 0.0   | 630.2893  | 1    |
| YIKSFPLTKAKARAIL        | 250   | 265 | 0.0    | 0.0  | 0.0   | 0.0   | 0.0   | 0.0    | 0.0   | 0.0   | 0.0   | 0.0   | 0.0   | 0.0   | 1819.1047 | 3    |
| TGKTTDKSPFVIYDM         | 266   | 280 | 0.0    | 0.0  | 0.0   | 0.0   | 0.0   | 0.0    | 0.0   | 0.0   | 0.0   | 0.0   | 0.0   | 0.0   | 1701.8200 | 2    |
| TGKTTDKSPFVIYDMNSLM     | 266   | 284 | 5.6    | 0.0  | 2.8   | 0.0   | 0.0   | 1.7    | -2.8  | 0.6   | 2.8   | 0.0   | 0.0   | 0.1   | 2147.0144 | 2    |
| MMGEDKIKFKHITPLQEQSKEVA | 284   | 306 | 0.0    | 0.0  | 0.0   | 0.0   | 0.0   | 0.0    | 0.0   | 0.0   | 0.0   | 0.0   | 0.0   | 0.0   | 2686.4065 | 4    |
| FRSVEAVEQTE             | 315   | 326 | 0.0    | 0.0  | -12.5 | -10.0 | -12.5 | -7.0   | -25.0 | -33.3 | -37.5 | -33.3 | -25.0 | -30.8 | 1406.7056 | 2    |
| AVQEITEYAKSIPGFVNL      | 320   | 337 | 0.0    | 0.0  | 0.0   | 0.0   | 0.0   | 0.0    | -5.9  | -2.9  | -8.8  | -17.6 | -17.6 | -10.6 | 1978.0386 | 2    |
| ITEYAKSIPGFVNL          | 324   | 337 | 0.0    | -3.8 | 0.0   | 0.0   | 0.0   | -0.8   | 0.0   | -3.8  | 0.0   | -3.8  | -3.8  | -2.3  | 1550.8332 | 2    |
| YAKSIPGFVNL             | 327   | 337 | 0.0    | 5.0  | 5.0   | 0.0   | 0.0   | 2.0    | -5.0  | 5.0   | 0.0   | 0.0   | 0.0   | 0.0   | 1207.6366 | 2    |
| YAKSIPGFVNLNDLND        | 327   | 341 | 3.6    | 0.0  | 0.0   | 0.0   | 0.0   | 0.7    | 0.0   | -3.6  | 0.0   | 0.0   | 0.0   | -0.7  | 1664.7870 | 2    |
| YAKSIPGFVNLNDLNDQVTL    | 327   | 345 | 2.8    | 0.0  | 2.8   | 2.8   | 2.8   | 2.2    | 0.0   | 0.0   | 0.0   | 0.0   | 0.0   | 0.0   | 2106.0926 | 2    |
| PGFVNL                  | 332   | 337 | 0.0    | 0.0  | 0.0   | 0.0   | 0.0   | 0.0    | 0.0   | 0.0   | 0.0   | 0.0   | 0.0   | 0.0   | 645.3519  | 1    |
| DLNDQVTL                | 338   | 345 | 0.0    | 0.0  | 0.0   | 0.0   | 0.0   | 0.0    | 0.0   | 0.0   | 0.0   | 0.0   | 0.0   | 0.0   | 916.4452  | 1    |
| QVTLKYGVEHIIYTM         | 342   | 358 | 0.0    | 0.0  | 0.0   | 0.0   | 0.0   | 0.0    | 0.0   | 0.0   | 0.0   | -2.9  | 0.0   | -0.6  | 2020.1008 | 3    |
| LKYGVHEIY               | 346   | 355 | 0.0    | 0.0  | 0.0   | 0.0   | 0.0   | 0.0    | 0.0   | 0.0   | 0.0   | -5.0  | 0.0   | -1.0  | 1233.6306 | 2    |
| LKYGVHEIYTM             | 346   | 358 | -3.8   | 0.0  | 0.0   | 0.0   | 0.0   | -0.8   | 0.0   | 0.0   | 0.0   | -3.8  | 0.0   | -0.8  | 1578.8462 | 2    |
| TMLASLMNKDGLV           | 356   | 368 | 0.0    | -3.8 | 0.0   | 0.0   | 0.0   | -0.8   | 0.0   | -7.7  | -23.1 | -30.8 | -30.8 | -18.5 | 1391.7160 | 2    |
| ISEGQGFMTREFL           | 369   | 381 | 3.8    | 0.0  | 3.8   | 0.0   | 0.0   | 1.5    | -3.8  | -3.8  | -19.2 | -15.4 | -19.2 | -12.3 | 1513.7048 | 2    |
| ISEGQGFMTREFLRLKRPFGD   | 369   | 390 | 0.0    | 0.0  | 0.0   | 0.0   | 0.0   | 0.0    | -4.8  | -9.5  | -19.0 | -19.0 | -19.0 | -14.3 | 2542.3233 | 4    |
| FLKSLRKPFGDF            | 380   | 391 | 0.0    | 0.0  | 0.0   | 0.0   | 0.0   | 0.0    | -9.1  | -4.5  | -4.5  | -4.5  | 0.0   | -4.5  | 1453.8061 | 3    |
| KSLRKPFGDFMEPKFEF       | 382   | 398 | 10.0   | 5.0  | 10.0  | 5.0   | 0.0   | 6.0    | -15.0 | -25.0 | -10.0 | -5.0  | -5.0  | -12.0 | 2102.0716 | 3    |
| PKFEF                   | 394   | 398 | 12.5   | 12.5 | 12.5  | 12.5  | 12.5  | 12.5   | -12.5 | -25.0 | -25.0 | -12.5 | -25.0 | -20.0 | 666.3427  | 1    |
| AVKFNALELDDSD           | 399   | 411 | 0.0    | 0.0  | 0.0   | 0.0   | 0.0   | 0.0    | 0.0   | -3.8  | 0.0   | 0.0   | 0.0   | -0.8  | 1435.6826 | 2    |
| AVKFNALELDDSD L         | 399   | 412 | 0.0    | -3.6 | 3.6   | 0.0   | 0.0   | 0.0    | 0.0   | -3.6  | 0.0   | -3.6  | 0.0   | -1.4  | 1548.7760 | 2    |
| NALELDDSD               | 403   | 412 | 0.0    | 0.0  | 0.0   | -5.0  | 0.0   | -1.0   | -5.0  | 0.0   | -10.0 | -5.0  | -5.0  | -5.0  | 1103.5060 | 1    |
| LELDDSD                 | 405   | 412 | -6.3   | -6.3 | -6.3  | 0.0   | 0.0   | -3.8   | -6.3  | -6.3  | -12.5 | 0.0   | 0.0   | -5.0  | 918.4162  | 1    |
| IIVILSGDRPGL            | 416   | 428 | 0.0    | 0.0  | 0.0   | 0.0   | 0.0   | 0.0    | 0.0   | 0.0   | 0.0   | 0.0   | 0.0   | 0.0   | 1322.7974 | 2    |
| IIVILSGDRPGLL           | 416   | 429 | 0.0    | 0.0  | 0.0   | 0.0   | 0.0   | 0.0    | 0.0   | -3.8  | 0.0   | 0.0   | 0.0   | -0.8  | 1435.8740 | 2    |
| VIIILSGDRPGLL           | 418   | 429 | 0.0    | 0.0  | 0.0   | 0.0   | 0.0   | 0.0    | 0.0   | -4.5  | 0.0   | 0.0   | 0.0   | -0.9  | 1251.7626 | 2    |
| LSGDRPGLL               | 421   | 429 | 6.3    | 6.3  | 6.3   | 6.3   | 6.3   | 6.3    | -6.3  | -18.8 | -18.8 | -12.5 | -12.5 | -13.8 | 926.4278  | 2    |
| NVKPIEDIQDNL            | 430   | 442 | 0.0    | 0.0  | 0.0   | 0.0   | 0.0   | 0.0    | 0.0   | 0.0   | 0.0   | 0.0   | 0.0   | 0.0   | 1509.8016 | 2    |
| NVKPIEDIQDNLQA          | 430   | 444 | 0.0    | 0.0  | 0.0   | 0.0   | 0.0   | 0.0    | 0.0   | 0.0   | 0.0   | 0.0   | 0.0   | 0.0   | 1708.8950 | 2    |
| IQDNLQAELQLKLNHPSSQL    | 437   | 459 | 0.0    | 0.0  | 0.0   | 0.0   | 0.0   | 0.0    | 0.0   | 0.0   | 0.0   | 0.0   | 0.0   | 0.0   | 2643.4522 | 3    |
| LELQLKLNHPSSQL          | 445   | 459 | 3.6    | 0.0  | 0.0   | 0.0   | 0.0   | 0.7    | 3.6   | 0.0   | 0.0   | 0.0   | 0.0   | 0.7   | 1747.9548 | 2    |
| FAKLLQKMTD              | 460   | 469 | 0.0    | 0.0  | 5.0   | 0.0   | 0.0   | 1.0    | 0.0   | -5.0  | 0.0   | -5.0  | -5.0  | -3.0  | 1193.6288 | 2    |
| FAKLLQKMTDLRQ           | 460   | 472 | 3.8    | 0.0  | 0.0   | -3.8  | -3.8  | -0.8   | 0.0   | 0.0   | -3.8  | -7.7  | -7.7  | -3.8  | 1590.8647 | 3    |
| LQKMTDLRQIVTEHVQL       | 464   | 480 | 0.0    | -2.9 | 0.0   | -2.9  | 0.0   | -1.2   | 0.0   | 0.0   | 0.0   | 0.0   | 0.0   | 0.0   | 2051.1202 | 3    |
| HVQLLQVVIKTETDMSLHPLL   | 477   | 497 | 0.0    | 0.0  | 0.0   | 0.0   | 0.0   | 0.0    | 0.0   | 0.0   | 0.0   | 0.0   | 0.0   | 0.0   | 2442.3856 | 3    |
| LQVIKTETDMSLHPLL        | 481   | 497 | 0.0    | 0.0  | 0.0   | 0.0   | 0.0   | 0.0    | 0.0   | 0.0   | 0.0   | 0.0   | 0.0   | 0.0   | 1965.1064 | 2    |
| LQVIKTETDMSLHPLLQE      | 481   | 499 | 0.0    | 0.0  | 0.0   | -2.8  | 0.0   | -0.6   | -5.6  | 0.0   | 0.0   | -2.8  | -2.8  | -2.2  | 2222.2165 | 3    |
| SLHPLLQEIKDLY           | 492   | 505 | 0.0    | 0.0  | 0.0   | 0.0   | 0.0   | 0.0    | 0.0   | 0.0   | -3.8  | -3.8  | -3.8  | -2.3  | 1730.9348 | 2    |
| HPLLQEIKDLY             | 494   | 505 | 0.0    | 0.0  | 4.5   | 4.5   | 0.0   | 1.8    | 0.0   | 0.0   | 0.0   | 0.0   | 0.0   | 0.0   | 1530.8072 | 2    |

**Fig. S7. Differential HDX-MS data for SB1404 and SB1405.** The sequence of the peptide is given along with PPAR $\gamma$ 2 start / end residue numbers. The %D values are the difference between the mean HDX value obtained from apo PPAR $\gamma$  LBD measured at 5 time points (10 s, 60 s, 300 s, 1800 s, 7200 s). Each experiment was triplicated.



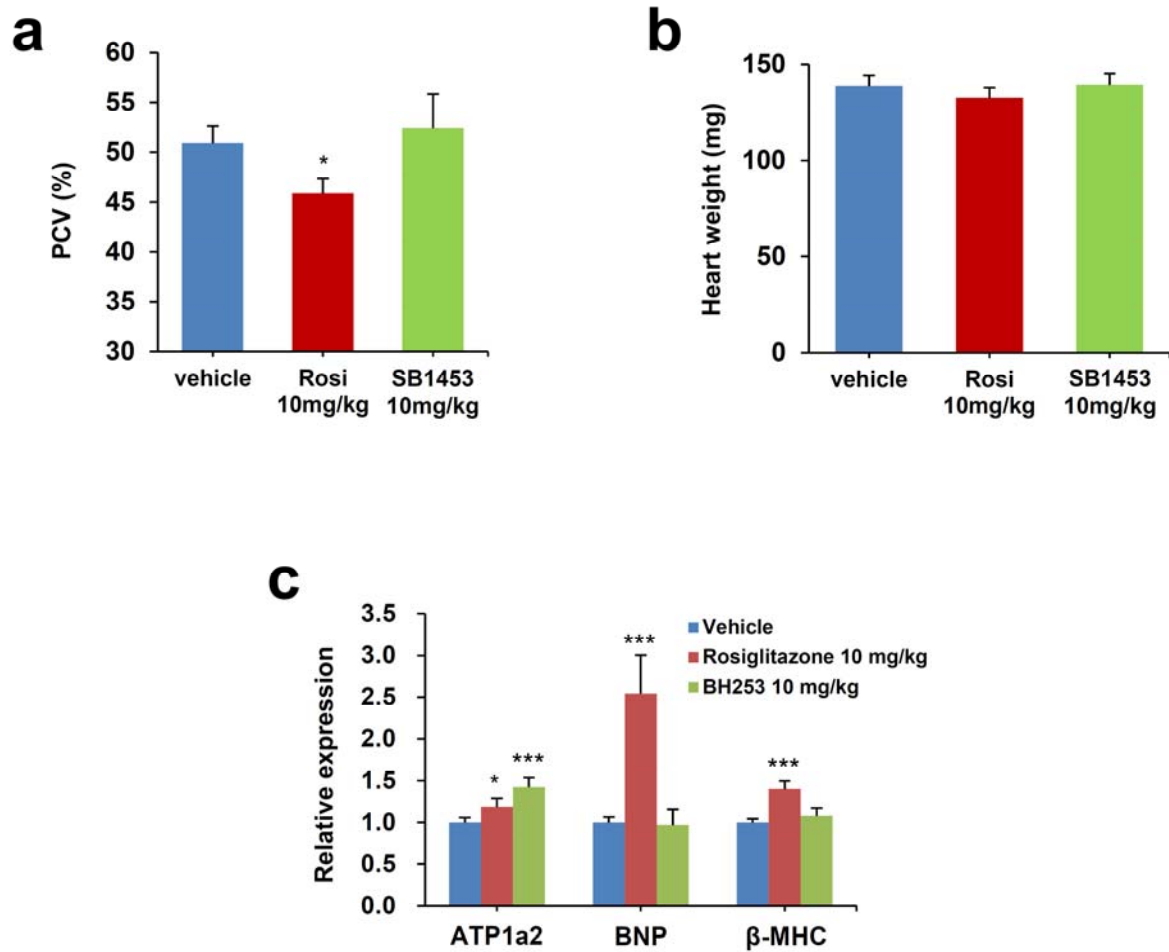

**Fig. S8. Adverse effects upon treatment with rosiglitazone or SB1453 *in vivo*.** Packed cell volume (PCV) in whole blood (**a**), heart weight (**b**), and the expression of marker genes for heart failure and cardiac hypertrophy in heart (**c**) were determined in high-fat diet-induced obese mice treated with rosiglitazone or SB1453 (14 days, 10 mg/kg/day) ( $n=6$ ). All of represented error bars are S.E.M. ( $n=6$ ). \* $p<0.05$ , \*\*\* $p<0.001$  compared with vehicle.

## Fluorescence Scanning Image

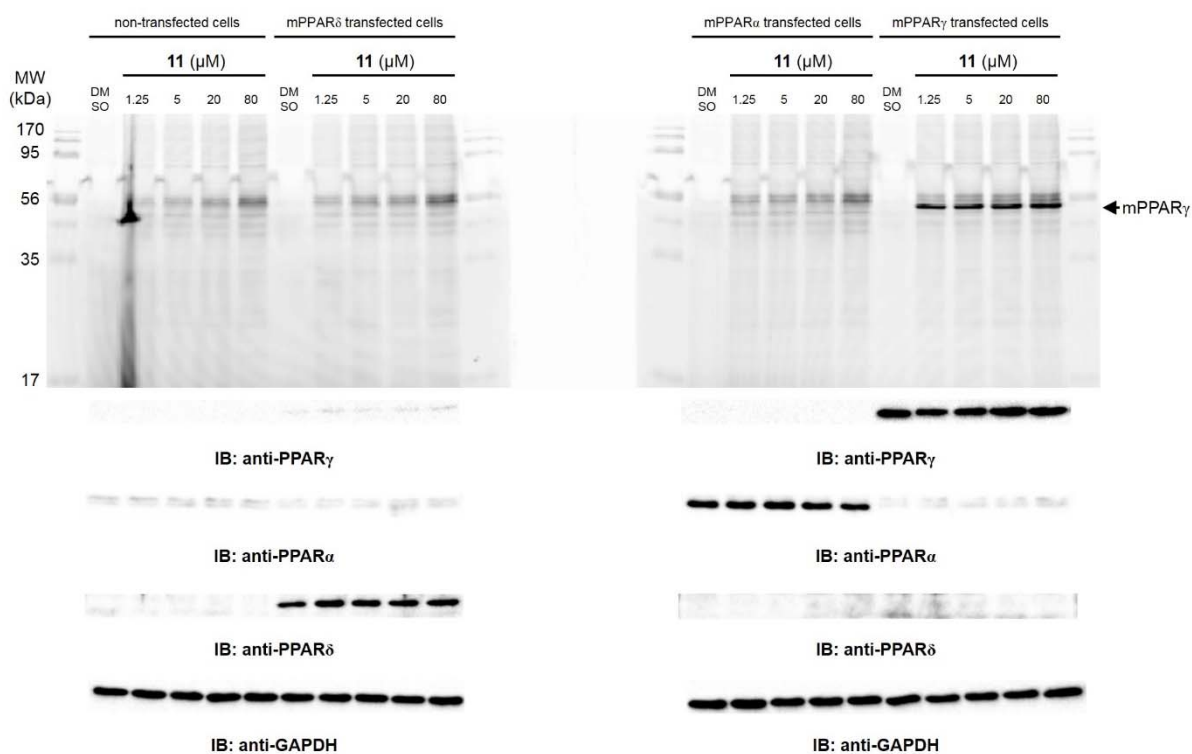

**Fig. S9. PPAR subtype selectivity of covalent inhibitor.** Predominant fluorescence-labelled protein was observed in lysate of murine PPAR $\gamma$  (mPPAR $\gamma$ ) transfected HEK-293T cells when these cells were treated with target identification probe **11**, followed by copper-catalyzed Click reaction with an azide-containing Cy5. In case of non-transfected cells, murine PPAR $\alpha$  (mPPAR $\alpha$ ) transfected cells, and PPAR $\delta$  (mPPAR $\delta$ ) transfected cells, this kind of fluorescence-labelled protein was not detected.

## 2. Supplementary Tables

| Table S1. Statistics on data collection and refinement |                                          |                                          |                                          |                                          |                                          |                                          |
|--------------------------------------------------------|------------------------------------------|------------------------------------------|------------------------------------------|------------------------------------------|------------------------------------------|------------------------------------------|
|                                                        | SB1404                                   | SB1405                                   | SB1406                                   | SB1451                                   | SB1453                                   | SR1664                                   |
| <b>A. Data collection</b>                              |                                          |                                          |                                          |                                          |                                          |                                          |
| Beamline source <sup>a</sup>                           | PLS BL-7A                                | PLS BL-7A                                | PLS BL-7A                                | PLS BL-7A                                | PLS BL-7A                                | PLS BL-7A                                |
| Space group                                            | <i>P</i> 2 <sub>1</sub> 2 <sub>1</sub> 2 | <i>P</i> 2 <sub>1</sub> 2 <sub>1</sub> 2 | <i>P</i> 2 <sub>1</sub> 2 <sub>1</sub> 2 | <i>P</i> 2 <sub>1</sub> 2 <sub>1</sub> 2 | <i>P</i> 2 <sub>1</sub> 2 <sub>1</sub> 2 | <i>P</i> 2 <sub>1</sub> 2 <sub>1</sub> 2 |
| Unit cell parameters                                   |                                          |                                          |                                          |                                          |                                          |                                          |
| <i>a</i> (Å)                                           | 53.38                                    | 53.95                                    | 53.33                                    | 55.27                                    | 54.86                                    | 53.08                                    |
| <i>b</i> (Å)                                           | 130.85                                   | 130.89                                   | 131.33                                   | 131.30                                   | 130.28                                   | 130.87                                   |
| <i>c</i> (Å)                                           | 53.27                                    | 52.59                                    | 52.85                                    | 51.97                                    | 52.25                                    | 53.06                                    |
| $\alpha = \beta = \gamma$ (°)                          | 90                                       | 90                                       | 90                                       | 90                                       | 90                                       | 90                                       |
| X-ray wavelength (Å)                                   | 0.97934                                  | 0.97935                                  | 0.97934                                  | 0.97933                                  | 0.97935                                  | 0.97934                                  |
| Resolution range (Å)                                   | 50.0–2.80<br>(2.85–2.80) <sup>b</sup>    | 50.0–2.75<br>(2.80–2.75) <sup>b</sup>    | 50.0–2.95<br>(3.00–2.95) <sup>b</sup>    | 50.0–2.75<br>(2.80–2.75) <sup>b</sup>    | 50.0–2.30<br>(2.34–2.30) <sup>b</sup>    | 50.0–2.20<br>(2.24–2.20) <sup>b</sup>    |
| Total / unique reflections                             | 53,885 /<br>9,648                        | 51,736 /<br>10,385                       | 56,026 /<br>8,258                        | 51,628 /<br>10,377                       | 101,485 /<br>17,551                      | 135,258 /<br>19,374                      |
| Completeness (%)                                       | 98.5<br>(99.0) <sup>b</sup>              | 99.5<br>(100.0) <sup>b</sup>             | 99.3<br>(100.0) <sup>b</sup>             | 99.7<br>(100.0) <sup>b</sup>             | 99.7<br>(100.0) <sup>b</sup>             | 99.2<br>(100.0) <sup>b</sup>             |
| $\langle I \rangle / \langle \sigma \rangle$           | 34.0 (4.0) <sup>b</sup>                  | 30.3 (5.0) <sup>b</sup>                  | 38.2 (4.6) <sup>b</sup>                  | 25.2 (4.0) <sup>b</sup>                  | 36.9 (5.2) <sup>b</sup>                  | 42.3 (4.3) <sup>b</sup>                  |
| $R_{\text{merge}}^c$ (%)                               | 6.1 (52.8) <sup>b</sup>                  | 7.6 (41.6) <sup>b</sup>                  | 6.4 (57.8) <sup>b</sup>                  | 8.9 (64.9) <sup>b</sup>                  | 7.2 (47.2) <sup>b</sup>                  | 7.2 (55.9) <sup>b</sup>                  |
| <b>B. Model refinement</b>                             |                                          |                                          |                                          |                                          |                                          |                                          |
| Resolution range (Å)                                   | 30.0–2.80                                | 30.0–2.75                                | 30.0–2.95                                | 30.0–2.75                                | 30.0–2.30                                | 30.0–2.20                                |
| $R_{\text{work}} / R_{\text{free}}^d$ (%)              | 20.8 / 24.4                              | 20.2 / 23.0                              | 20.5 / 25.7                              | 19.2 / 24.3                              | 19.6 / 24.1                              | 20.6 / 23.8                              |
| No. of non-hydrogen atoms                              |                                          |                                          |                                          |                                          |                                          |                                          |
| Protein                                                | 2189                                     | 2201                                     | 2154                                     | 2247                                     | 2252                                     | 2264                                     |
| Ligand                                                 | 13                                       | 26                                       | 26                                       | 44                                       | 44                                       | 41                                       |
| Water oxygen                                           | 32                                       | 25                                       | 25                                       | 39                                       | 87                                       | 73                                       |
| Wilson <i>B</i> factor (Å <sup>2</sup> )               | 75.0                                     | 66.6                                     | 78.6                                     | 55.1                                     | 45.7                                     | 48.8                                     |
| Average <i>B</i> factor (Å <sup>2</sup> )              |                                          |                                          |                                          |                                          |                                          |                                          |
| Protein                                                | 83.3                                     | 78.5                                     | 86.2                                     | 59.7                                     | 58.4                                     | 65.4                                     |
| Ligand                                                 | 98.6                                     | 78.3                                     | 84.5                                     | 59.4                                     | 60.0                                     | 64.9                                     |
| Water oxygen                                           | 81.0                                     | 69.0                                     | 65.0                                     | 50.1                                     | 59.6                                     | 62.6                                     |
| R.m.s. deviations from ideal geometry                  |                                          |                                          |                                          |                                          |                                          |                                          |
| Bond lengths (Å)                                       | 0.011                                    | 0.009                                    | 0.009                                    | 0.010                                    | 0.010                                    | 0.013                                    |
| Bond angles (°)                                        | 1.48                                     | 1.45                                     | 1.47                                     | 1.43                                     | 1.50                                     | 1.49                                     |
| Ramachandran plot <sup>e</sup>                         |                                          |                                          |                                          |                                          |                                          |                                          |
| Favored / Outliers (%)                                 | 97.0 / 0.0                               | 97.4 / 0.0                               | 97.3 / 0.0                               | 97.1 / 0.0                               | 98.5 / 0.0                               | 98.2 / 0.0                               |
| Poor rotamers (%)                                      | 0.00                                     | 0.00                                     | 0.00                                     | 0.00                                     | 0.00                                     | 0.00                                     |

<sup>a</sup> PLS stands for Pohang Light Source, Korea.

<sup>b</sup> Values in parentheses refer to the highest resolution shell.

<sup>c</sup>  $R_{\text{merge}} = \frac{\sum_h \sum_i |I(h)_i - \langle I(h) \rangle|}{\sum_h \sum_i I(h)_i}$ , where  $I(h)$  is the intensity of reflection  $h$ ,  $\sum_h$  is the sum over all reflections, and  $\sum_i$  is the sum over  $i$  measurements of reflection  $h$ .

<sup>d</sup>  $R_{\text{work}} = \frac{\sum | |F_{\text{obs}}| - |F_{\text{calc}}| |}{\sum |F_{\text{obs}}|}$ , where  $R_{\text{free}}$  is calculated for a randomly chosen 5% of reflections, which were not used for structure refinement and  $R_{\text{work}}$  is calculated for the remaining reflections.

<sup>e</sup> Values obtained using *MolProbability*.

**Table S2. Primer sequences used for qPCR**

| <b>Gene</b>        | <b>Forward primer</b>   | <b>Reverse primer</b>   |
|--------------------|-------------------------|-------------------------|
| <i>aP2</i>         | AAGGTGAAGAGCATCATAACCCT | TCACGCCTTTCATAACACATTCC |
| <i>Adiponectin</i> | TGTTCTCTTAATCTGCCCA     | CCAACCTGCACAAGTTCCCTT   |
| <i>Adipsin</i>     | CATGCTCGGCCCTACATGG     | CACAGAGTCGTATCCGTAC     |
| <i>Cyp2f2</i>      | GTCGGTGTTACGGTGTACC     | AAAGTTCCGCAGGATTTGGAC   |
| <i>Rarres2</i>     | GCCTGGCCTGCATTAATAATGG  | CTTGCTTCAGAATTGGGCAGT   |
| <i>Selenbp1</i>    | ATGGCTACAAAATGCACAAAGTG | CCTGTGTTCCGGTAAATGCAG   |
| <i>Car3</i>        | TGACAGGTCTATGCTGAGGGG   | CAGCGTATTTTACTCCGTCCAC  |
| <i>Peg10</i>       | TGCTTGACAGAGCTACAGTC    | AGTTTGGGATAGGGGCTGCT    |
| <i>Cidec</i>       | ATGGACTACGCCATGAAGTCT   | CGGTGCTAACACGACAGGG     |
| <i>Cd24a</i>       | GTTGCACCGTTTCCCGGTAA    | CCCCTCTGGTGGTAGCGTTA    |
| <i>Acyl</i>        | CAGCCAAGGCAATTTACAGAGC  | CTCGACGTTTGATTAAGTGGTCT |
| <i>Nr1d2</i>       | TGAACGCAGGAGGTGTGATTG   | GAGGACTGGAAGCTATTCTCAGA |
| <i>Ddx17</i>       | TCTTCAGCCAACAATCCAATC   | GGCTCTATCGGTTTCACTACG   |
| <i>Aplp2</i>       | GTGGTGAAGACCGTGACTAC    | TCGGGGAACTTTAACATCGT    |
| <i>Nr3c1</i>       | AGTCCCCCTGGTAGAGAC      | GGTGAAGACGCAGAAACCTTG   |
| <i>Rybp</i>        | CGACCAGGCCAAAAGACAAG    | CACATCGCAGATGCTGCATT    |
| <i>Txnip</i>       | TCTTTTGAGGTGGTCTTCAACG  | GCTTTGACTCGGGTAACTTCACA |
| <i>Nr1d1</i>       | TACATTGGCTCTAGTGGCTCC   | CAGTAGGTGATGGTGGGAAGTA  |
| <i>Cycs</i>        | CCAAATCTCCACGGTCTGTTC   | ATCAGGGTATCCTCTCCCCAG   |
| <i>Ppcs</i>        | CGCTTTCTGGACAACCTCAGT   | GGGAGCGCATTCTCTTCGG     |
| <i>Fdx1</i>        | CAAGGGGAAAATTGGCGACTC   | TTGGTCAGACAACTTGGCAG    |
| <i>Fgfr1</i>       | ATGGCCGCACAATCCACAG     | TGGTGGCCTTGACACATAAA    |
| <i>ldh3a</i>       | TGGGTGTCCAAGGTCTCTC     | CTCCCACTGAATAGGTGCTTTG  |
| <i>Abhd12</i>      | GTCACCTTGAGCATGAGC      | GCAATGTAGAACCCAGAACAC   |
| <i>Nadk</i>        | TCATGGGGATGAGACCTGGAG   | ACAAGCACACTCTTGGGAGAC   |
| <i>Arhgap5</i>     | TTGGACTCTCTGGGACTGAAA   | AGCACAGAAGTATGCTCTGGA   |
| <i>Pdk4</i>        | AGGGAGGTGAGACTGTTCTC    | GGAGTGTCACTAAGCGGTCA    |
| <i>Las1l</i>       | GGAGGTGAACATTCCAGACTG   | CTCATCCAACCTCCAGGTTTC   |
| <i>Cib2</i>        | GACAACTACCAGGACTGCACT   | CCATCCTCGGAGAAAGCCTC    |
| <i>Fmr1</i>        | CAATGGCGCTTTCTACAAGGC   | TCTGGTTGCCAGTTGTTTTCA   |
| <i>Pim3</i>        | AAGGACACGGTCTACACTGAC   | GACACCACTCAATAAGCTGCT   |
| <i>Phospho1</i>    | CTCACCTTCGACTTCGATGAGA  | CCCAGGTACTTAAAGACTCGTTG |
| <i>Plin2</i>       | GACCTTGTGCTCCTCCGCTTAT  | CAACCGCAATTTGTGGCTC     |
| <i>Lass4</i>       | TACCCACATCAGACCCTGAAT   | TCATGGGGATGAGACCTGGAG   |

### 3. Biochemical Procedures

**Reagents.** SR1664 (SML0636, Sigma), GW9662 (M6191, Sigma), and rosiglitazone (R0106, TCI) were purchased from commercial vendors and used without further purification. Cell culture reagents, including serum, medium, and antibiotic-antimycotic solution, were obtained from Gibco, Invitrogen.

**Cell culture.** HEK-293, HEK-293T and 3T3-L1 cells were obtained from American Type Culture Collection and cultured in Dulbecco's modified Eagle's medium (DMEM) supplemented with 1% (v/v) antibiotic-antimycotic solution and 10% fetal bovine serum (FBS). 3T3-L1 preadipocytes were grown in 6-well plates to 100% confluency and induced by treating the cells with 1  $\mu$ M dexamethasone, 850 nM insulin, and 10  $\mu$ M compound in DMEM containing 10% FBS for 2 days, and the cell culture was subsequently maintained by replacing the medium with fresh DMEM containing 10% FBS and 850 nM insulin. At day 8, accumulated lipid in the 3T3-L1 cells was detected by Oil Red O staining.

***In vitro* kinase assay.** *In vitro* Cdk5 assay was conducted according to the manufacturer's instructions [Cell Signaling Technology, USA]. Briefly, 0.5  $\mu$ g of purified PPAR $\gamma$  LBD was incubated with active Cdk5/p35 [Millipore, USA] in assay buffer (25 mM Tris-HCl, pH 7.5, 5 mM  $\beta$ -glycerophosphate, 2 mM DTT, 0.1 mM Na<sub>3</sub>VO<sub>4</sub>, 10 mM MgCl<sub>2</sub>) containing 25  $\mu$ M ATP for 30 min at 30 °C. Compounds were pre-incubated with PPAR $\gamma$  LBD for 30 min at 30 °C before performing the assay. Rb-peptide [residues 773–928, Millipore] was also used as a substrate of Cdk5 to know whether the compounds affect the fundamental kinase function of Cdk5 or not. Phosphorylation of substrates was analyzed by western blotting with anti-Cdk substrate antibody to detect phospho-Ser in a K/R-S-P-K/R motif, which is the consensus motif for Cdk substrates



[Cell Signaling Technology, USA].

**Cell-based luciferase reporter gene assay.** HEK-293T cells were seeded in 96-well plates at a density of 7000 cells per well a day prior to transfection. The cells were transfected with pDR-1 luciferase reporter plasmid, PPAR $\gamma$ , RXR $\alpha$ , and pRL-renillina using the calcium phosphate transfection protocol. Following an overnight transfection, the cells were treated with rosiglitazone, SR1664, SB1451, or SB1453 for 24 h. The cells were harvested and reporter gene assay were performed by using the Dual-luciferase kit [Promega, USA]. Luciferase activity was measured using Bio-Tek microplate reader [ELx800TM, Bio-Tek Instruments Inc., USA] and normalized to Renilla activity. Fold change of treated cells over DMSO-treated control cells were plotted in triplicates.

**Preparation of cell or tissue lysates and immunoblotting.** HEK-293 cells expressing PPAR $\gamma$  were treated with phorbol 12-myristate 13-acetate (PMA) (0.5  $\mu$ M) for 30 min and total cell lysates were incubated with FLAG M2 agarose [Sigma Aldrich, USA] at 4 °C. For tissue lysates, WAT from mice was homogenized in RIPA buffer (50 mM Tris, pH 7.5, 150 mM NaCl, 1% NP-40, 0.5% sodium deoxycholate, 0.1% SDS with protease and phosphatase inhibitors). Immunoprecipitates, total cell lysates or tissue lysates were analyzed with phospho-specific antibody against PPAR $\gamma$  Ser273 or anti-PPAR $\gamma$  antibody [Santa Cruz Biotechnology, Inc., USA].

**Gene expression analysis.** Total RNA was isolated from cells or tissues using Trizol reagents [Invitrogen, CA, USA]. The RNA was reverse-transcribed using ABI reverse transcription kit. Quantitative PCR reactions were performed with SYBR green fluorescent dye using an ABI9300 PCR machine. Relative mRNA expression was determined by the  $\Delta\Delta$ -Ct method normalized to TATA-binding protein (TBP) levels.

**Hydrogen-deuterium exchange mass spectrometry (HDX-MS)** PPAR $\gamma$  LBD (aa 223~505) 25  $\mu$ M were incubated with 50  $\mu$ M SB1404 or SB1405 in 5% ACN for 30 min at R.T., followed by incubating with 20-fold D<sub>2</sub>O at 25 °C for the various times: 10, 60, 300, 1800, and 7200 s. The deuterium labeling reaction was quenched by 2.5 mM tris (2-carboxyethyl) phosphine (TCEP) in formic acid, pH 2.3. For protein digestion, 1  $\mu$ g of porcine pepsin was added to each quenched protein sample and incubated on ice for 3 min before injection. Peptic peptides were separated and identified by nanoAcquity<sup>TM</sup>/ESI/MS (SYNAPT<sup>TM</sup> HDMS<sup>TM</sup>) [Waters, UK]. Briefly, peptides were desalted on C18 trap column cartridge [Waters, UK] and separated on analytical column (BEH130 C18, 1.7  $\mu$ m particle size, 100  $\mu$ m i.d. x 100 mm) by gradient elution from 8% ACN to 40% ACN, 0.1% formic acid [Waters, UK] at a flow rate 0.5  $\mu$ L/min for 7 min. The auto-sampler chamber was set at 5°C. The trap, analytical column and all tubing were immersed in an ice bath, 0°C, to minimize deuterium back-exchange. Separated peptic peptides in gradient chromatography were identified by spraying on line to ESI/MS/MS. We obtained the MS coverage of identified peptides was 94%. The extent of deuterium exchange was monitored the increase in mass of the isotope distribution for each identified peptide, and calculated by Microsoft Excel. The theoretical maximum deuterium exchange value was calculated for each peptide based on the number of exchangeable amides. Each experiment was triplicated.

**Target identification using fluorescence labeling.** HEK-293T cells expressing murine PPAR $\alpha$ , PPAR $\delta$ , or PPAR $\gamma$ , or differentiated 3T3-L1 cells were scrapped with cold phosphate buffered saline (PBS) and centrifuged. The supernatant was discarded and cell pellet was resuspended in PBS containing protease inhibitor cocktail. The cells were lysed by freeze-thaw cycles, and the cell lysate was centrifuged at 4 °C,

13000 rpm for 15 min. The mixture of proteome and **11** was incubated at 30 °C for 1 h. Click chemistry was performed to the mixture with Cy5-azide [Lumiprobe, USA] (80  $\mu$ M), TBTA (100  $\mu$ M), CuSO<sub>4</sub> (1 mM), TCEP (2 mM) and tBuOH (5%) for 1.5 h. The resulting proteome was separated by gel electrophoresis and scanned with Typhoon Trio [GE Healthcare, UK]. The in-gel fluorescence signal was visualized at the Cy5 (633 nm excitation) channel by Typhoon Trio and analyzed by ImageQuant TL program [Amersham Bioscience, USA]. The fluorescence labeled protein was identified by western blotting with anti-PPAR $\gamma$  antibody [Cell Signaling Technology, USA].

## 4. Crystallography

**Protein expression and purification.** The human PPAR $\gamma$  LBD construct (residues 195–477 in PPAR $\gamma$ 1) was PCR-amplified and cloned into the expression vector pET-28b(+) [Novagen, USA]. This construct of the recombinant protein encodes a 21-residue *N*-terminal tail (MGSSHHHHHH SSGLVPRGSH M) containing a His<sub>6</sub> tag and a thrombin cleavage site in front of the starting residue Ala195. The recombinant human PPAR $\gamma$  LBD was overexpressed in *Escherichia coli* Rosetta 2(DE3) cells using the Luria Broth culture medium. Protein expression was induced by 0.5 mM isopropyl  $\beta$ -D-thiogalactopyranoside and the cells were incubated for additional 24 h at 18 °C following growth to mid-log phase at 37 °C. The cells were lysed by sonication in buffer A (20 mM Tris-HCl at pH 8.5, 150 mM NaCl, 10% (v/v) glycerol and 0.1 mM tris(2-carboxyethyl) phosphine hydrochloride) containing 5 mM imidazole and 1 mM phenylmethylsulfonyl fluoride. The crude lysate was centrifuged at 36,000 g for 1 h. The supernatant was applied to a HiTrap Chelating HP affinity chromatography column [GE Healthcare, UK], which was previously equilibrated with buffer A containing 5 mM imidazole. Upon eluting with a gradient of imidazole in the same buffer, the human PPAR $\gamma$  LBD was eluted at 45–100 mM imidazole concentration. The eluted protein was desalted in buffer A by HiPrep 26/10 desalting column [GE Healthcare, UK] to remove imidazole, and the protein was cleaved with 2 U/mg thrombin protease [Sigma Aldrich, USA] at 4 °C overnight. The *N*-terminal fusion tag and uncleaved material were removed by rechromatography with a HiTrap Chelating HP affinity chromatography column. The flow-through was applied to a HiLoad XK-16 Superdex 200 prep-grade column [GE Healthcare, UK], which was previously equilibrated with buffer A. Fractions containing the human PPAR $\gamma$  LBD were pooled and concentrated

to 15.4 mg/mL using an Amicon Ultra-15 Centrifugal Filter Unit [Millipore, USA].

**Crystallization.** Before crystallization, the purified PPAR $\gamma$  LBD and a LXXLL motif-containing peptide derived from human steroid receptor coactivator-1 (SRC1) (residues 685–700, ERHKILHRLQLQEGSPS) were mixed in a ratio of 1:2, with a 10-fold molar excess of the PPAR $\gamma$  ligands. After overnight incubation, the protein was crystallized by the sitting-drop vapor diffusion method using the Mosquito robotic system [TTP Labtech, UK] at 23 °C by mixing 0.2  $\mu$ L of the protein solution and 0.2  $\mu$ L of the reservoir solution. Crystals of PPAR $\gamma$  LBD in complex with various ligands and the SRC1 peptide were obtained with a reservoir solution of 2.2 M sodium malonate (pH 7.0), except for crystals of PPAR $\gamma$  LBD in complex with SB1451. The PPAR $\gamma$ -SB1451-SRC1 crystals were obtained with a reservoir solution of 100 mM sodium cacodylate (pH 6.5), 190 mM sodium acetate and 26% (w/v) PEG 8000. All structures were deposited in the protein data bank: SR1664 (PDB: 5DWL), SB1404 (PDB: 5DV6), SB1405 (PDB: 5DV3), SB1406 (PDB: 5DSH), SB1451 (PDB: 5DV8) and SB1453 (PDB: 5DVC).

**X-ray data collection.** X-ray diffraction data were collected at 100 K using a Quantum 270 CCD detector system [Area Detector Systems Corporation, USA] at the BL-7A experimental station of Pohang Light Source, Korea. Raw X-ray diffraction data were processed and scaled using the program suite HKL2000<sup>1</sup>. Data collection statistics are summarized in **Table S1**. All structures were solved by molecular replacement with the program *MolRep*<sup>2</sup> using the previously published PPAR $\gamma$  LBD structure (PDB: 3VN2)<sup>3</sup> as a search model. Subsequent model building was done manually using the program *COOT*<sup>4</sup> and the models were refined with the program *REFMAC5*<sup>5</sup>, including the bulk solvent correction. A total of 5% of the data was randomly set aside as test

data for the calculation of  $R_{\text{free}}$ .<sup>6</sup> The stereochemistry of the refined models was assessed by *MolProbability*.<sup>7</sup> Refinement statistics are summarized in **Table S1**.

## 5. *In vivo* studies

**Animals.** All animal experiments were performed according to procedures approved by Ulsan National Institute of Science and Technology's Institutional Animal Care and Use Committee. 5-week-old male C57BL/6J mice [DBL, Korea] were fed a high fat diet [60% kcal fat, D12492, Research Diets Inc., NJ, USA] for 10 weeks. For glucose tolerant tests (GTTs), mice were intraperitoneally injected daily 10 mg/kg rosiglitazone, SB1453, or vehicle for 7 days, and fasted overnight prior to injection of 1.5 g/kg D-glucose. Glucose was measured in tail vein blood at intervals after glucose injection using a Truetrack glucometer [Nipro Diagnostics, Japan]. For analysis of adverse effects, mice were intraperitoneally injected daily 10 mg/kg rosiglitazone, SB1453, or vehicle for 14 days. The packed cell volume (PCV) was determined by dividing the volume of packed red blood cells by the total volume of blood followed by centrifuging whole blood in a capillary tube.

**Statistical analysis.** Data are presented as means  $\pm$  standard errors of the means (SEMs) as indicated in the figure legends. Comparisons between two groups were made by unpaired two-tailed Student's *t*-tests. P values of <0.05 were considered statistically significant. Microsoft Excel was used for statistical calculations.



## 6. Chemical Synthesis

The section below describes the synthesis of compounds which are used in this study.

### General information

All chemicals and solvents were purchased from commercial vendors and used without further purification unless noted otherwise. Analytical thin layer chromatography (TLC) was performed on pre-coated glass-backed plates (silica gel 60; F<sub>254</sub> 0.25 mm) with visualization by ultraviolet (UV) irradiation at 254 nm and/or staining with ninhydrin solution. The products were purified by flash column chromatography on silica gel (230–400 mesh). <sup>1</sup>H and <sup>13</sup>C NMR spectra were recorded on Bruker DRX-300 [Bruker Biospin, Germany], Agilent 400-MR DD2 [Agilent, USA] or Varian Inova-500 [Varian Assoc., Palo Alto, USA]. <sup>1</sup>H chemical shifts are reported in ppm from tetramethylsilane (TMS) as internal standard. Multiplicity was indicated as follows: s (singlet), d (doublet), t (triplet), q (quartet), p (pentet), m (multiplet), dd (doublet of doublet), dt (doublet of triplet), td (triplet of doublet), brs (broad singlet), etc. Coupling constants are reported in Hertz (Hz). <sup>13</sup>C chemical shifts are reported in ppm relative to chloroform-*d* (δ 77.16, triplet) or DMSO-*d*<sub>6</sub> (δ 39.52, septet). Mass spectrometric analysis was performed with Finnigan Surveyor MSQ Plus LC/MS [Thermo Electron Corp., USA] or LCMS-2020 [Shimadzu Corp., JAPAN] using electrospray ionization (ESI).

## General procedure for synthesis of compounds 1–4 and 6

To a solution of 2-chloro-5-nitrobenzoyl chloride (500 mg, 2.3 mmol) and amine (1.5 equiv.) in dichloromethane (20 mL), triethylamine (2.5 equiv.) was added and the mixture was stirred at room temperature for 1 h. After removal of solvent and triethylamine under the reduced pressure, the residue was dissolved with 1N HCl and dichloromethane. The organic layer was separated and the aqueous layer was extracted two times with dichloromethane. The combined organic layer was dried over anhydrous Na<sub>2</sub>SO<sub>4</sub>(s) and filtered through a celite-packed glass filter. The filtrate was concentrated under the reduced pressure and purified by silica-gel flash column chromatography (1:5~1:2 = ethyl acetate:*n*-hexane, v/v) to obtain the desired product.

### Compound 1 (SB1404), 2-chloro-*N*-methyl-5-nitrobenzamide

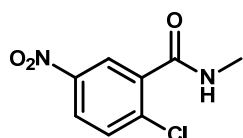

Yield: 68% as white solid; <sup>1</sup>H NMR (400 MHz, CDCl<sub>3</sub>) δ 8.51 (d, *J* = 2.8 Hz, 1H), 8.21 (dd, *J* = 8.4, 2.8 Hz, 1H), 7.60 (d, *J* = 8.8 Hz, 1H), 6.23 (brs, 1H), 3.07 (d, *J* = 4.8 Hz, 1H); <sup>13</sup>C NMR (100 MHz, CDCl<sub>3</sub>) δ 165.0, 146.7, 137.7, 136.6, 131.6, 125.8, 125.4, 27.2; LRMS (ESI) *m/z* calcd for C<sub>8</sub>H<sub>8</sub>ClN<sub>2</sub>O<sub>3</sub> [M+H]<sup>+</sup>: 215.02; Found: 215.06.

### Compound 2 (SB1405), *N*-(2-(benzyloxy)phenyl)-2-chloro-5-nitrobenzamide

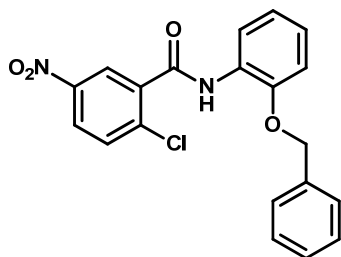

Yield: 98% as light yellow solid; <sup>1</sup>H NMR (400 MHz, CDCl<sub>3</sub>) δ 8.78 (brs, 1H), 8.64 (d, *J* = 2.8 Hz, 1H), 8.48 (dd, *J* = 7.6, 1.2 Hz, 1H), 8.16 (dd, *J* = 8.8, 2.4 Hz, 1H), 7.48 (d, *J* = 8.8 Hz, 1H), 7.41–7.34 (m, 5H), 7.10 (d, *J* = 7.6, 1.6 Hz, 1H),

7.05–7.00 (m, 2H), 5.11 (s, 2H);  $^{13}\text{C}$  NMR (100 MHz,  $\text{CDCl}_3$ )  $\delta$  161.5, 147.8, 146.7, 137.5, 136.2, 136.0, 131.7, 128.8, 128.6, 128.0, 127.3, 126.1, 125.9, 125.0, 121.6, 120.6, 111.8, 71.2; LRMS (ESI)  $m/z$  calcd for  $\text{C}_{20}\text{H}_{16}\text{ClN}_2\text{O}_4$   $[\text{M}+\text{H}]^+$ : 383.08; Found: 382.91.

**Compound 3 (SB1406)**, *N*-(3-(benzyloxy)phenyl)-2-chloro-5-nitrobenzamide

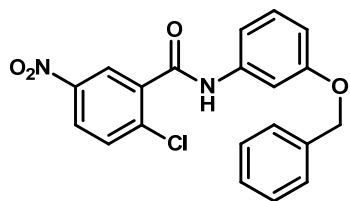

Yield: 98% as white solid;  $^1\text{H}$  NMR (400 MHz,  $\text{CDCl}_3$ )  $\delta$  8.58 (d,  $J = 2.4$  Hz, 1H), 8.23 (dd,  $J = 8.8, 2.4$  Hz, 1H), 7.84 (s, 1H), 7.64 (d,  $J = 8.8$  Hz, 1H), 7.45–7.24 (m, 7H), 7.09 (d,  $J = 8.4$  Hz, 1H), 6.81 (dd,  $J = 8.4, 2.0$  Hz, 1H), 5.07 (s, 2H);  $^{13}\text{C}$  NMR (100 MHz,  $\text{CDCl}_3$ )  $\delta$  162.4, 159.5, 146.7, 138.2, 137.7, 136.8, 136.6, 131.7, 130.1, 128.7, 128.2, 127.7, 126.1, 125.3, 112.8, 112.2, 107.2, 70.2; LRMS (ESI)  $m/z$  calcd for  $\text{C}_{20}\text{H}_{16}\text{ClN}_2\text{O}_4$   $[\text{M}+\text{H}]^+$ : 383.08; Found: 382.87.

**Compound 4**, 2-chloro-5-nitro-*N*-(2-phenoxyphenyl)benzamide

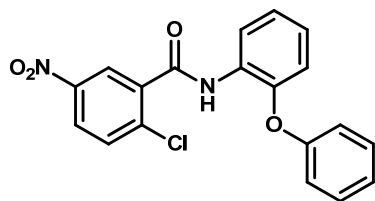

Yield: 94% as off-white solid;  $^1\text{H}$  NMR (500 MHz,  $\text{CDCl}_3$ )  $\delta$  8.63 (s, 1H), 8.60 (d,  $J = 2.5$  Hz, 1H), 8.58 (dd,  $J = 7.5, 1.5$  Hz, 1H), 8.23 (dd,  $J = 7.5, 2.5$  Hz, 1H), 7.60 (d,  $J = 8.5$  Hz, 1H), 7.38–7.35 (m, 2H), 7.21–7.10 (m, 3H), 7.02 (d,  $J = 9.0$  Hz, 2H), 6.92 (dd,  $J = 8.0, 1.5$  Hz, 1H);  $^{13}\text{C}$  NMR (100 MHz,  $\text{CDCl}_3$ )  $\delta$  161.9, 156.4, 146.8, 146.2, 137.5, 136.4, 131.7, 130.1, 129.1, 126.0, 125.8, 125.3, 124.3, 124.2, 121.4, 118.6, 118.1; LRMS (ESI)  $m/z$  calcd for  $\text{C}_{19}\text{H}_{14}\text{ClN}_2\text{O}_4$   $[\text{M}+\text{H}]^+$ : 369.06; Found: 369.05.

**Compound 6**, 2-chloro-*N*-(2-ethoxyphenyl)-5-nitrobenzamide

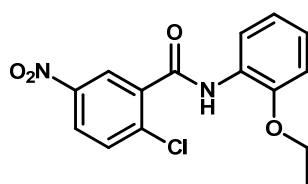

Yield: 95% as off-white solid;  $^1\text{H NMR}$  (400 MHz,  $\text{CDCl}_3$ )  $\delta$  8.77 (brs, 1H), 8.72 (d,  $J = 2.8$  Hz, 1H), 8.50 (dd,  $J = 8.0, 1.2$  Hz, 1H), 8.25 (dd,  $J = 8.8, 2.8$  Hz, 1H), 7.66 (d,  $J = 8.8$  Hz, 1H), 7.13 (td,  $J = 8.0, 1.2$  Hz, 1H), 7.02 (t,  $J = 8.0$  Hz, 1H), 6.92 (d,  $J = 8.0$  Hz, 1H), 4.14 (q,  $J = 6.8$  Hz, 2H), 1.45 (t,  $J = 6.8$  Hz, 3H);  $^{13}\text{C NMR}$  (100 MHz,  $\text{CDCl}_3$ )  $\delta$  161.5, 147.7, 146.9, 137.5, 136.5, 131.9, 127.1, 126.2, 126.0, 125.0, 121.2, 120.3, 111.1, 64.4, 15.0; LRMS (ESI)  $m/z$  calcd for  $\text{C}_{15}\text{H}_{14}\text{ClN}_2\text{O}_4$   $[\text{M}+\text{H}]^+$ : 321.06; Found: 321.15.

**General procedure for synthesis of compounds 5 and 7**

*N*-Boc-2-aminophenol (100 mg, 0.48 mmol), alkyl bromide (2.0 equiv.), and  $\text{K}_2\text{CO}_3$  (1.5 equiv.) were dissolved in anhydrous DMF (15 mL) under argon atmosphere. The reaction mixture was stirred at 80 °C for 12 h, and the crude mixture was diluted with deionized water. The aqueous layer was extracted three times with ethyl acetate. The combined organic layer was dried over anhydrous  $\text{Na}_2\text{SO}_4(\text{s})$  and filtered through a celite-packed glass filter. The filtrate was concentrated under the reduced pressure and purified by silica-gel flash column chromatography (1:10 = ethyl acetate:*n*-hexane, v/v) to obtain *N*-Boc-2-substituted aniline. After Boc-deprotection with 10% trifluoroacetic acid in dichloromethane (10 mL) at room temperature for 1 h, the reaction mixture was washed with saturated aqueous  $\text{NaHCO}_3$  three times, and concentrated under the reduced pressure to provide 2-substituted aniline. To a solution of 2-substituted aniline in dichloromethane (10 mL), 2-chloro-5-nitrobenzoyl chloride (1.5 equiv.) and triethylamine (2.0 equiv.) were added and the mixture was stirred at

room temperature for 1 h. After removal of solvent and triethylamine under the reduced pressure, the residue was purified by silica-gel flash column chromatography (1:5 = ethyl acetate:*n*-hexane, v/v) to obtain the desired product.

**Compound 5**, 2-chloro-5-nitro-*N*-(2-phenethoxyphenyl)benzamide

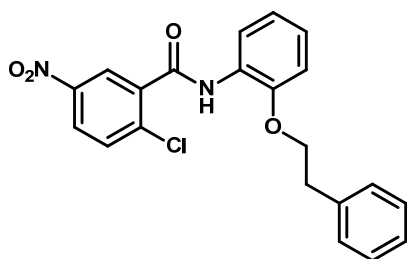

Yield: 63% as light yellow solid;  $^1\text{H}$  NMR (300 MHz,  $\text{CDCl}_3$ )  $\delta$  8.54 (d,  $J = 5.7$  Hz, 1H), 8.46 (dd,  $J = 8.1, 1.8$  Hz, 1H), 8.36 (s, 1H), 8.26 (dd,  $J = 8.7, 2.7$  Hz, 1H), 7.64 (d,  $J = 8.7$  Hz, 1H), 7.16–7.08 (m, 6H), 7.04 (td,  $J = 7.8, 1.5$  Hz, 1H), 6.95 (dd,  $J = 7.8, 1.5$  Hz, 1H), 4.30 (t,  $J = 6.6$  Hz, 2H), 3.10 (t,  $J = 6.6$  Hz, 2H);  $^{13}\text{C}$  NMR (75 MHz,  $\text{CDCl}_3$ )  $\delta$  161.7, 147.4, 146.8, 137.8, 137.7, 136.9, 131.7, 128.8, 128.6, 127.3, 126.7, 125.9, 125.5, 125.0, 121.6, 120.4, 111.6, 69.1, 35.6; LRMS (ESI)  $m/z$  calcd for  $\text{C}_{21}\text{H}_{18}\text{ClN}_2\text{O}_4$   $[\text{M}+\text{H}]^+$ : 397.10; Found: 397.15.

**Compound 7**, 2-chloro-*N*-(2-(hexyloxy)phenyl)-5-nitrobenzamide

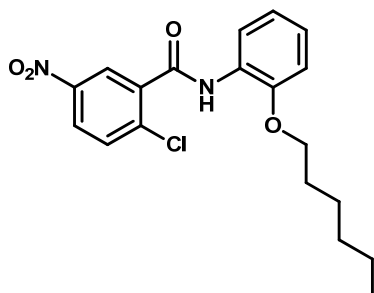

Yield: 50% as white solid;  $^1\text{H}$  NMR (400 MHz,  $\text{CDCl}_3$ )  $\delta$  8.76 (brs, 1H), 8.72 (d,  $J = 2.8$  Hz, 1H), 8.50 (dd,  $J = 8.0, 1.2$  Hz, 1H), 8.25 (dd,  $J = 8.8, 2.8$  Hz, 1H), 7.66 (d,  $J = 8.8$  Hz, 1H), 7.13 (t,  $J = 8.0$ , 1H), 7.02 (t,  $J = 8.0$  Hz, 1H), 6.92 (d,  $J = 8.0$  Hz, 1H), 4.06 (t,  $J = 6.8$  Hz, 2H), 1.81 (m, 2H), 1.45 (m, 2H), 1.32 (m, 4H), 0.87 (t,  $J = 6.8$  Hz, 3H);  $^{13}\text{C}$  NMR (100 MHz,  $\text{CDCl}_3$ )  $\delta$  161.5, 147.9, 146.9, 137.5, 136.5, 131.8, 127.1, 126.2, 126.0, 125.0, 121.2, 120.3, 111.1, 68.9, 31.6, 29.3, 25.9, 22.7, 14.1; LRMS (ESI)  $m/z$  calcd for  $\text{C}_{19}\text{H}_{22}\text{ClN}_2\text{O}_4$   $[\text{M}+\text{H}]^+$ : 377.13; Found: 377.20.

**Synthesis of compound 8**, 2-chloro-*N*-(2-(2-(4-methylpiperazin-1-yl)ethoxy)phenyl)-5-nitrobenzamide

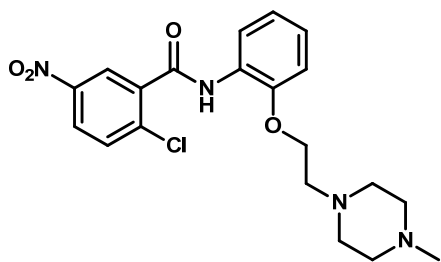

*N*-Boc-2-aminophenol (290 mg, 1.4 mmol), 4-methylpiperazine-1-ethanol (200 mg, 1.4 mmol), triphenylphosphine (550 mg, 2.1 mmol) were dissolved in anhydrous THF (20 mL) under argon atmosphere and diethyl azodicarboxylate (360 mg, 2.1 mmol) was added slowly. The reaction mixture was stirred at room temperature for 12 h, and concentrated under the reduced pressure. The residue was purified by silica-gel flash column chromatography (1:20 = methanol:dichloromethane, v/v) to obtain tert-butyl (2-(2-(4-methylpiperazin-1-yl)ethoxy)phenyl)carbamate. After Boc-deprotection with 10% trifluoroacetic acid in dichloromethane (10 mL) at room temperature for 1 h, the reaction mixture was washed with saturated aqueous NaHCO<sub>3</sub> three times, and concentrated under the reduced pressure to provide 2-(2-(4-methylpiperazin-1-yl)ethoxy)aniline. To a solution of 2-(2-(4-methylpiperazin-1-yl)ethoxy)aniline in dichloromethane (10 mL), 2-chloro-5-nitrobenzoyl chloride (460 mg, 2.1 mmol) and triethylamine (0.39 mL, 2.8 mmol) were added and the mixture was stirred at room temperature for 1 h. After removal of solvent and triethylamine under the reduced pressure, the residue was purified by silica-gel flash column chromatography (1:10 = MeOH:CH<sub>2</sub>Cl<sub>2</sub>, v/v) to obtain **8** (260 mg). Yield: 45% as light yellow solid; <sup>1</sup>H NMR (400 MHz, CDCl<sub>3</sub>) δ 9.31 (brs, 1H), 8.64 (d, *J* = 2.8 Hz, 1H), 8.45 (td, *J* = 8.0, 1.6 Hz, 1H), 8.26 (td, *J* = 8.4, 2.8 Hz, 1H), 7.66 (d, *J* = 8.4 Hz, 1H), 7.13 (dd, *J* = 8.0, 1.6 Hz, 1H), 7.08 (dd, *J* = 8.0, 1.2 Hz, 1H), 6.98 (dd, *J* = 8.0, 1.2 Hz, 1H), 4.19 (t, *J* = 5.6 Hz, 2H), 2.72 (t, *J* = 5.6 Hz, 2H), 2.50–2.43 (m, 8H), 2.16 (s, 3H); <sup>13</sup>C NMR (100 MHz, CDCl<sub>3</sub>) δ 161.9, 147.9, 146.5, 137.8, 137.0, 131.5, 128.0,



125.7, 125.5, 125.1, 121.9, 121.0, 113.2, 66.7, 57.0, 54.6, 53.1, 45.8; LRMS (ESI)  $m/z$  calcd for  $C_{20}H_{24}ClN_4O_4$   $[M+H]^+$ : 419.15; Found: 419.06.

### Procedure for synthesis of compound 9 (SB1451)

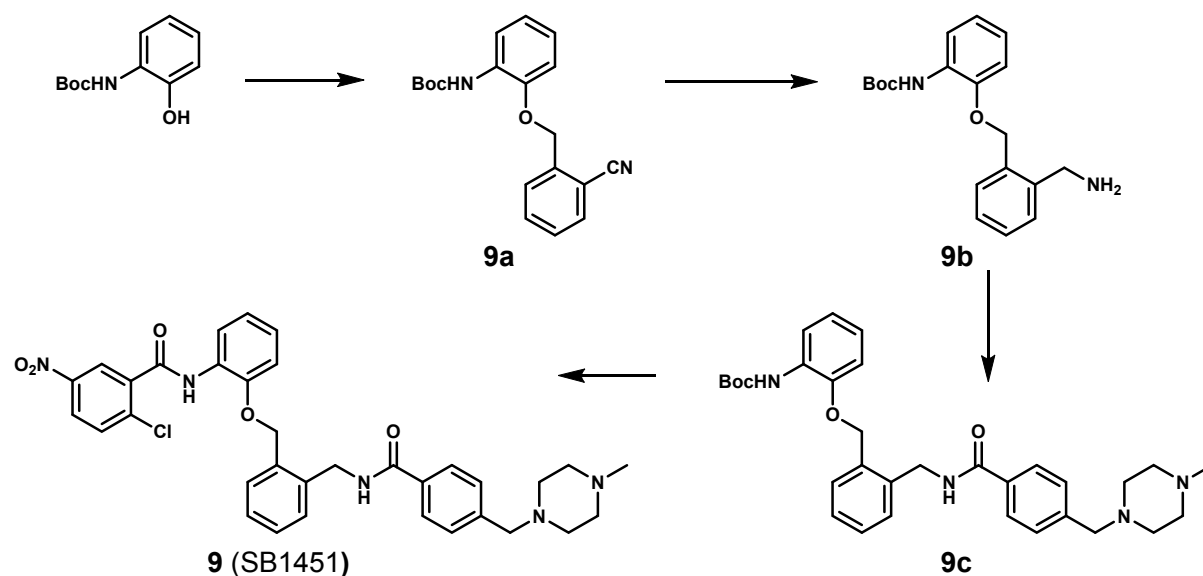

### Synthesis of 9a, *tert*-butyl (2-((2-cyanobenzyl)oxy)phenyl)carbamate

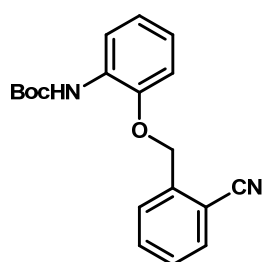

*N*-Boc-2-aminophenol (800 mg, 3.8 mmol), 2-(bromomethyl) benzonitrile (1.5 g, 7.6 mmol) and  $K_2CO_3$  (790 mg, 5.7 mmol) were dissolved in anhydrous DMF (30 mL) under argon atmosphere. The reaction mixture was stirred at 80 °C for 12 h, and the crude

mixture was diluted with deionized water. The aqueous layer was extracted three times with ethyl acetate. The combined organic layer was dried over anhydrous  $Na_2SO_4$ (s) and filtered through a celite-packed glass filter. The filtrate was concentrated under the reduced pressure and purified by silica-gel flash column chromatography (1:5 =

ethyl acetate:*n*-hexane, v/v) to obtain **9a** (1.23 g). Yield: 99% as off-white solid; <sup>1</sup>H NMR (400 MHz, CDCl<sub>3</sub>) δ 8.09 (d, *J* = 6.8 Hz, 1H), 7.73 (d, *J* = 8.0 Hz, 1H), 7.64 (t, *J* = 7.6 Hz, 1H), 7.59 (d, *J* = 7.2 Hz, 1H), 7.46 (t, *J* = 7.2 Hz, 1H), 7.09 (s, 1H), 7.00–6.92 (m, 2H), 6.89 (d, *J* = 8.0 Hz, 1H), 5.33 (s, 2H), 1.53 (s, 9H); <sup>13</sup>C NMR (100 MHz, CDCl<sub>3</sub>) δ 152.9, 146.2, 140.2, 133.30, 133.25, 128.9, 128.7, 128.6, 122.4, 122.3, 119.0, 117.2, 111.9, 111.5, 80.6, 68.4, 28.5; LRMS (ESI) *m/z* calcd for C<sub>19</sub>H<sub>21</sub>N<sub>2</sub>O<sub>3</sub> [M+H]<sup>+</sup>: 325.16; Found: 325.25.

### Synthesis of **9b**, *tert*-butyl (2-((2-(aminomethyl)benzyl)oxy)phenyl)carbamate

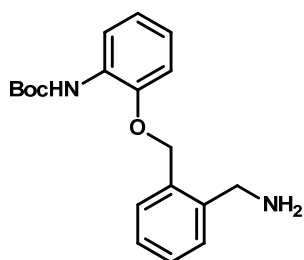

To a solution of **9a** (600 mg, 1.85 mmol) in anhydrous THF (15 mL) under argon atmosphere, LiAlH<sub>4</sub> (1.0 M in THF, 3.7ml) was added dropwise at 0 °C, and the mixture was warmed to room temperature. After 3 h, the reaction mixture was cooled to 0 °C and quenched with deionized water (3 mL). The crude mixture was worked up with ethyl acetate and saturated aqueous sodium potassium tartrate, and the organic layer was washed by brine. The combined organic layer was dried over anhydrous Na<sub>2</sub>SO<sub>4</sub>(s) and filtered through a celite-packed glass filter. The filtrate was concentrated under the reduced pressure and purified by silica-gel flash column chromatography (1:10 = MeOH:CH<sub>2</sub>Cl<sub>2</sub>, v/v) to obtain **9b** (360 mg). Yield: 59% as yellow oil; <sup>1</sup>H NMR (500 MHz, CDCl<sub>3</sub>) δ 8.13 (s, 1H), 7.85 (s, 1H), 7.44–7.38 (m, 3H), 7.31 (t, *J* = 7.0 Hz, 1H), 7.02–6.96 (m, 3H), 5.15 (s, 2H), 3.96 (s, 2H), 1.77 (brs, 2H), 1.52 (s, 9H); <sup>13</sup>C NMR (100 MHz, CDCl<sub>3</sub>) δ 153.1, 147.1, 140.4, 134.4, 129.9, 129.24, 129.20, 129.0, 127.7, 122.5, 121.9, 118.9, 112.5, 80.2, 69.6, 43.4, 28.5; LRMS (ESI) *m/z* calcd for C<sub>19</sub>H<sub>25</sub>N<sub>2</sub>O<sub>3</sub> [M+H]<sup>+</sup>: 329.19; Found:329.25.

**Synthesis of 9c**, *tert*-butyl (2-((2-((4-((4-methylpiperazin-1-yl)methyl)benzamido)methyl)benzyl)oxy)phenyl)carbamate

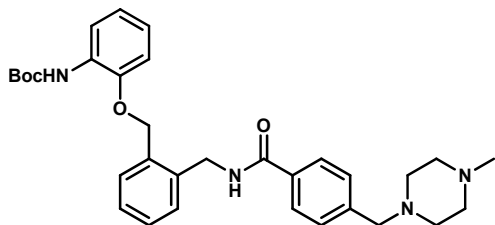

To a solution of **9b** (140 mg, 0.43 mmol) in dichloromethane (10 mL), 4-((4-methyl-1-piperazinyl)methyl)benzoic acid dihydrochloride (160 mg, 0.52 mmol), 1-ethyl-3-(3-dimethylaminopropyl)carbodiimide hydrochloride (100 mg, 0.52 mmol), triethylamine (0.24 mL, 1.7 mmol), and 4-dimethylaminopyridine (5.3 mg, 0.043 mmol) were added, and the mixture was stirred at room temperature for 12 h. The crude mixture was worked up with dichloromethane and saturated aqueous NaHCO<sub>3</sub>, and the organic layer was washed by brine. The combined organic layer was dried over anhydrous Na<sub>2</sub>SO<sub>4</sub>(s) and filtered through a celite-packed glass filter. The filtrate was concentrated under the reduced pressure and purified by silica-gel flash column chromatography (1:5 = MeOH:CH<sub>2</sub>Cl<sub>2</sub>, v/v) to obtain **9c** (170 mg). Yield: 74% as yellow oil; <sup>1</sup>H NMR (400 MHz, CDCl<sub>3</sub>) δ 8.04 (s, 1H), 7.63 (d, J = 8.4 Hz, 2H), 7.46–7.34 (m, 4H), 7.33 (d, J = 9.2 Hz, 2H), 6.99 (s, 1H), 6.97–6.90 (m, 3H), 6.61 (t, J = 4.8 Hz, 1H), 5.18 (s, 2H), 4.73 (d, J = 5.6 Hz, 2H), 3.49 (s, 2H), 2,34 (brs, 8H), 2.29 (s, 3H), 1.47 (s, 9H); <sup>13</sup>C NMR (100 MHz, CDCl<sub>3</sub>) δ 167.0, 152.8, 146.7, 142.4, 137.0, 134.7, 132.9, 130.0, 129.7, 120.24, 129.22, 128.5, 128.3, 127.0, 122.6, 122.0, 118.7, 112.3, 80.6, 69.3, 62.5, 55.1, 53.0, 46.0, 41.6, 28.4; LRMS (ESI) *m/z* calcd for C<sub>32</sub>H<sub>41</sub>N<sub>4</sub>O<sub>4</sub> [M+H]<sup>+</sup>: 545.31; Found:545.35.

**Synthesis of 9 (SB1451), 2-chloro-*N*-(2-((2-((4-((4-methylpiperazin-1-yl)methyl)benzamido)methyl)benzyl)oxy)phenyl)-5-nitrobenzamide**

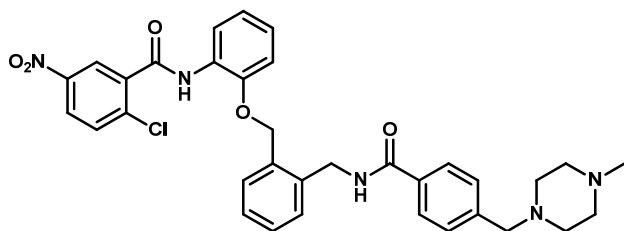

After **9c** (110 mg, 0.20 mmol) was treated with 10% trifluoroacetic acid in dichloromethane (10 mL) at room temperature for 1 h, the reaction

mixture was washed with saturated aqueous NaHCO<sub>3</sub> three times, and concentrated under the reduced pressure to provide *N*-(2-((2-aminophenoxy)methyl)benzyl)-4-((4-methylpiperazin-1-yl)methyl)benzamide. To a solution of *N*-(2-((2-aminophenoxy)methyl)benzyl)-4-((4-methylpiperazin-1-yl)methyl)benzamide in dichloromethane (10 mL), 2-chloro-5-nitrobenzoyl chloride (66 mg, 0.30 mmol) and triethylamine (56  $\mu$ L, 0.40 mmol) were added and the mixture was stirred at room temperature for 1 h. After removal of solvent and triethylamine under the reduced pressure, the residue was purified by silica-gel flash column chromatography (1:5 = MeOH:CH<sub>2</sub>Cl<sub>2</sub>, v/v) to obtain **9** (85 mg). Yield : 68% as light yellow solid; <sup>1</sup>H NMR (400 MHz, DMSO-*d*<sub>6</sub>)  $\delta$  10.09 (s, 1H), 8.99 (t, *J* = 6.0 Hz, 1H), 8.38 (d, *J* = 2.8 Hz, 1H), 8.26 (dd, *J* = 8.8, 2.8 Hz, 1H), 7.87 (dd, *J* = 7.6, 1.2 Hz, 1H), 7.80 (d, *J* = 9.2, 1H), 7.75 (d, *J* = 7.6, 2H), 7.55 (d, *J* = 7.6, 1H), 7.39–7.20 (m, 7H), 7.01 (t, *J* = 7.6 Hz, 1H), 5.34 (s, 2H), 4.59 (d, *J* = 5.6 Hz, 2H), 3.84 (s, 2H), 2.34 (brs, 8H), 2.15 (s, 3H); <sup>13</sup>C NMR (100 MHz, DMSO-*d*<sub>6</sub>)  $\delta$  166.1, 163.1, 150.5, 146.0, 141.8, 137.9, 137.7, 137.2, 134.2, 132.8, 131.3, 128.5, 128.2, 128.1, 127.1, 126.8, 126.29, 126.26, 125.5, 124.7, 124.0, 120.5, 113.1, 67.9, 61.6, 54.7, 52.5, 45.7; LRMS (ESI) *m/z* calcd for C<sub>34</sub>H<sub>35</sub>ClN<sub>5</sub>O<sub>5</sub> [M+H]<sup>+</sup>: 628.23; Found: 628.30.

## Procedure for synthesis of compound 10 (SB1453)

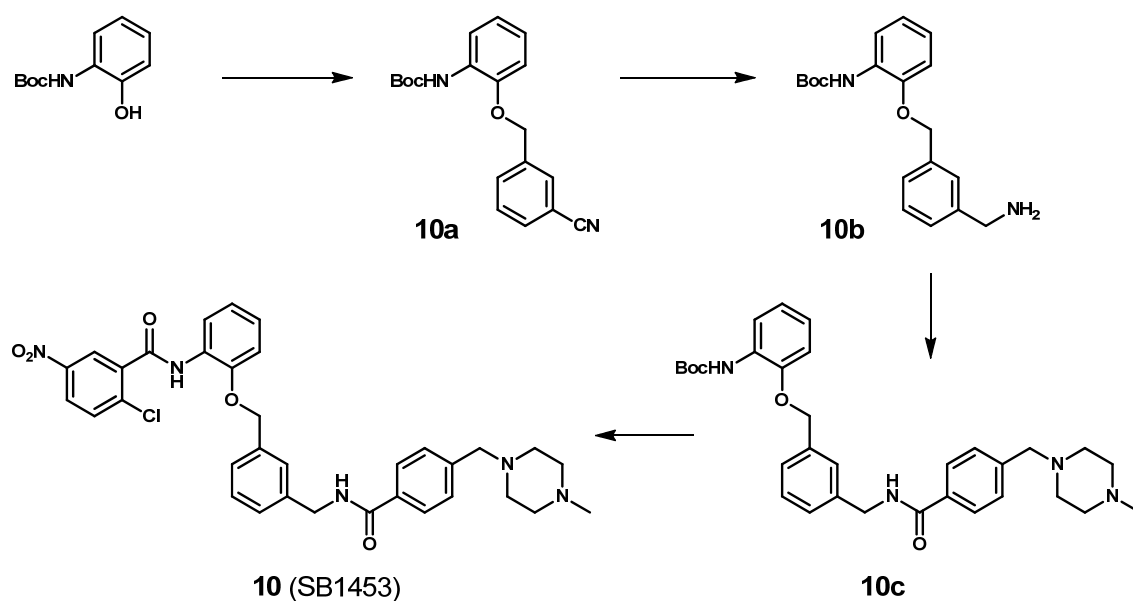

### Synthesis of 10a, tert-butyl (2-((3-cyanobenzyl)oxy)phenyl)carbamate

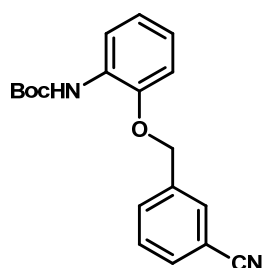

*N*-Boc-2-aminophenol (800 mg, 3.8 mmol), 3-(bromomethyl) benzonitrile (1.5 g, 7.6 mmol) and  $K_2CO_3$  (790 mg, 5.7 mmol) were dissolved in anhydrous DMF (30 mL) under argon atmosphere. The reaction mixture was stirred at 80 °C for 12 h, and the crude mixture was diluted with deionized water. The aqueous layer was extracted three times with ethyl acetate. The combined organic layer was dried over anhydrous  $Na_2SO_4$ (s) and filtered through a celite-packed glass filter. The filtrate was concentrated under the reduced pressure and purified by silica-gel flash column chromatography (1:5 = ethyl acetate:*n*-hexane, v/v) to obtain **10a** (1.20 g). Yield: 97% as yellow oil;  $^1H$  NMR (400 MHz,  $CDCl_3$ )  $\delta$  8.10 (d,  $J$  = 7.2 Hz, 1H), 7.71 (s, 1H), 7.64 (d,  $J$  = 8.0 Hz, 1H), 7.52 (t,  $J$  = 8.0 Hz, 1H), 7.02 (s, 1H), 7.00–6.91 (m, 2H), 6.83 (dd,  $J$  = 7.6, 1.2 Hz, 1H), 5.14 (s, 2H), 1.53 (s, 9H);  $^{13}C$  NMR (100 MHz,  $CDCl_3$ )  $\delta$  152.8, 146.3, 138.3, 132.0,

131.7, 130.9, 129.7, 128.5, 122.5, 122.1, 118.9, 118.6, 113.1, 111.7, 80.7, 69.6, 28.5;  
LRMS (ESI)  $m/z$  calcd for  $C_{19}H_{21}N_2O_3$   $[M+H]^+$ : 325.16; Found:325.20.

### Synthesis of **10b**, *tert*-butyl (2-((3-(aminomethyl)benzyl)oxy)phenyl)carbamate

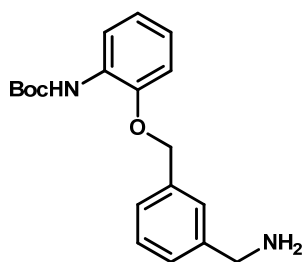

To a solution of **10a** (600 mg, 1.85 mmol) in anhydrous THF (15 mL) under argon atmosphere,  $LiAlH_4$  (1.0 M in THF, 3.7 mL) was added dropwise at 0 °C, and the mixture was warmed to room temperature. After 3 h, the reaction mixture was cooled to 0 °C and quenched with deionized water (3 mL). The crude mixture was worked up with ethyl acetate and saturated aqueous sodium potassium tartrate, and the organic layer was washed by brine. The combined organic layer was dried over anhydrous  $Na_2SO_4(s)$  and filtered through a celite-packed glass filter. The filtrate was concentrated under the reduced pressure and purified by silica-gel flash column chromatography (1:10 = MeOH: $CH_2Cl_2$ , v/v) to obtain **10b** (440 mg). Yield: 72% as off-white solid;  $^1H$  NMR (400 MHz,  $CDCl_3$ )  $\delta$  8.07 (brs, 1H), 7.40 (s, 1H), 7.38–7.29 (m, 3H), 7.12 (s, 1H), 6.97–6.87 (m, 3H), 5.08 (s, 2H), 3.91 (s, 2H), 2.81 (brs, 2H), 1.51 (s, 9H);  $^{13}C$  NMR (100 MHz,  $CDCl_3$ )  $\delta$  152.9, 146.8, 137.1, 129.1, 128.4, 127.4, 126.6, 126.4, 122.5, 121.6, 118.6, 111.8, 80.5, 70.8, 45.9, 28.5; LRMS (ESI)  $m/z$  calcd for  $C_{19}H_{25}N_2O_3$   $[M+H]^+$ : 329.19; Found: 329.22.

**Synthesis of 10c**, *tert*-butyl (2-((3-((4-((4-methylpiperazin-1-yl)methyl)benzamido)methyl)benzyl)oxy)phenyl)carbamate

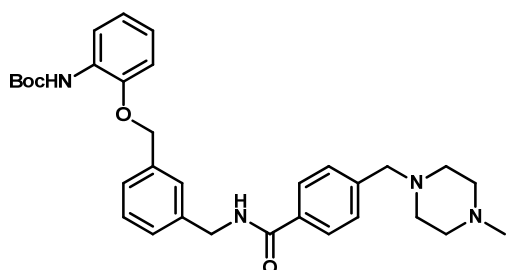

To a solution of **10b** (140 mg, 0.43 mmol) in dichloromethane (10 mL), 4-((4-methyl-1-piperazinyl)methyl)benzoic acid dihydrochloride (160 mg, 0.52 mmol), 1-ethyl-3-(3-dimethylaminopropyl)carbodiimide hydrochloride (100 mg, 0.52 mmol), triethylamine (0.24 mL, 1.7 mmol), and 4-dimethylaminopyridine (5.3 mg, 0.043 mmol) were added, and the mixture was stirred at room temperature for 12 h. The crude mixture was worked up with dichloromethane and saturated aqueous NaHCO<sub>3</sub>, and the organic layer was washed by brine. The combined organic layer was dried over anhydrous Na<sub>2</sub>SO<sub>4</sub>(s) and filtered through a celite-packed glass filter. The filtrate was concentrated under the reduced pressure and purified by silica-gel flash column chromatography (1:5 = MeOH:CH<sub>2</sub>Cl<sub>2</sub>, v/v) to obtain **10c** (230mg). Yield: 98% as yellow oil; <sup>1</sup>H NMR (400 MHz, CDCl<sub>3</sub>) δ 8.05 (s, 1H), 7.75 (d, *J* = 8.0 Hz, 2H), 7.38 (d, *J* = 8.0 Hz, 2H), 7.36–7.33 (m, 4H), 7.07 (brs, 1H), 6.93–6.86 (m, 3H), 6.66 (s, 1H), 5.09 (s, 2H), 4.65 (d, *J* = 5.6 Hz, 2H), 3.54 (s, 2H), 2.50 (brs, 8H), 2.31 (s, 3H), 1.53 (s, 9H); <sup>13</sup>C NMR (100 MHz, CDCl<sub>3</sub>) δ 167.4, 152.9, 146.7, 142.1, 139.0, 137.2, 133.2, 129.3, 128.5, 127.9, 127.1, 127.0, 126.8, 122.5, 121.6, 118.6, 112.0, 80.6, 70.8, 62.5, 55.0, 52.9, 45.9, 44.0, 28.4; LRMS (ESI) *m/z* calcd for C<sub>32</sub>H<sub>41</sub>N<sub>4</sub>O<sub>4</sub> [M+H]<sup>+</sup>: 545.31; Found: 545.40.

**Synthesis of 10 (SB1453)**, 2-chloro-*N*-(2-((3-((4-((4-methylpiperazin-1-yl)methyl)benzamido)methyl)benzyl)oxy)phenyl)-5-nitrobenzamide

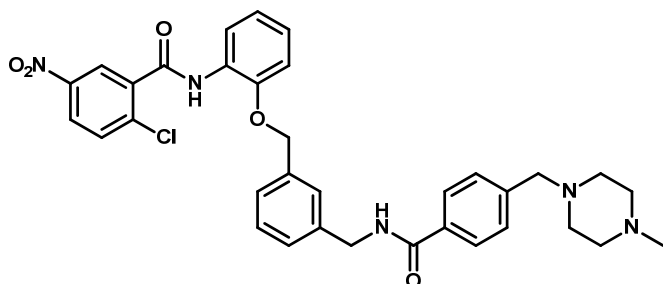

After **10c** (110 mg, 0.20 mmol) was treated with 10% trifluoroacetic acid in dichloromethane (10 mL) at room temperature for 1 h, the reaction mixture was washed with saturated aqueous NaHCO<sub>3</sub> three times, and concentrated under the reduced pressure to provide *N*-(3-((2-aminophenoxy)methyl)benzyl)-4-((4-methylpiperazin-1-yl)methyl)benzamide. To a solution of *N*-(3-((2-aminophenoxy)methyl)benzyl)-4-((4-methylpiperazin-1-yl)methyl)benzamide in dichloromethane (10 mL), 2-chloro-5-nitrobenzoyl chloride (66 mg, 0.30 mmol) and triethylamine (56  $\mu$ L, 0.40 mmol) were added and the mixture was stirred at room temperature for 1 h. After removal of solvent and triethylamine under the reduced pressure, the residue was purified by silica-gel flash column chromatography (1:5 = MeOH:CH<sub>2</sub>Cl<sub>2</sub>, v/v) to obtain **10** (102 mg). Yield: 81% as light yellow solid; <sup>1</sup>H NMR (400 MHz, DMSO-*d*<sub>6</sub>)  $\delta$  10.07 (s, 1H), 8.98 (t, *J* = 6.0 Hz, 1H), 8.37 (d, *J* = 2.8 Hz, 1H), 8.29 (dd, *J* = 8.4, 2.8 Hz, 1H), 7.84–7.81 (m, 4H), 7.43–7.31 (m, 5H), 7.26 (d, *J* = 7.6 Hz, 1H), 7.15 (t, *J* = 5.2 Hz, 2H), 7.01 (t, *J* = 7.6 Hz, 1H), 5.19 (s, 2H), 4.47 (d, *J* = 6.0 Hz, 2H), 3.48 (s, 2H), 2.34 (brs, 8H), 2.14 (s, 3H); <sup>13</sup>C NMR (100 MHz, DMSO-*d*<sub>6</sub>)  $\delta$  166.0, 163.0, 150.6, 146.0, 141.8, 139.9, 137.7, 137.2, 137.0, 133.0, 131.3, 128.6, 128.4, 127.2, 126.6, 126.32, 126.27, 125.9, 125.6, 124.7, 124.1, 120.5, 113.2, 69.8, 61.6, 54.7, 52.6, 45.7, 42.5; LRMS (ESI) *m/z* calcd for C<sub>34</sub>H<sub>35</sub>ClN<sub>5</sub>O<sub>5</sub> [M+H]<sup>+</sup>: 628.23; Found: 628.41.



## Procedure for synthesis of compound 11

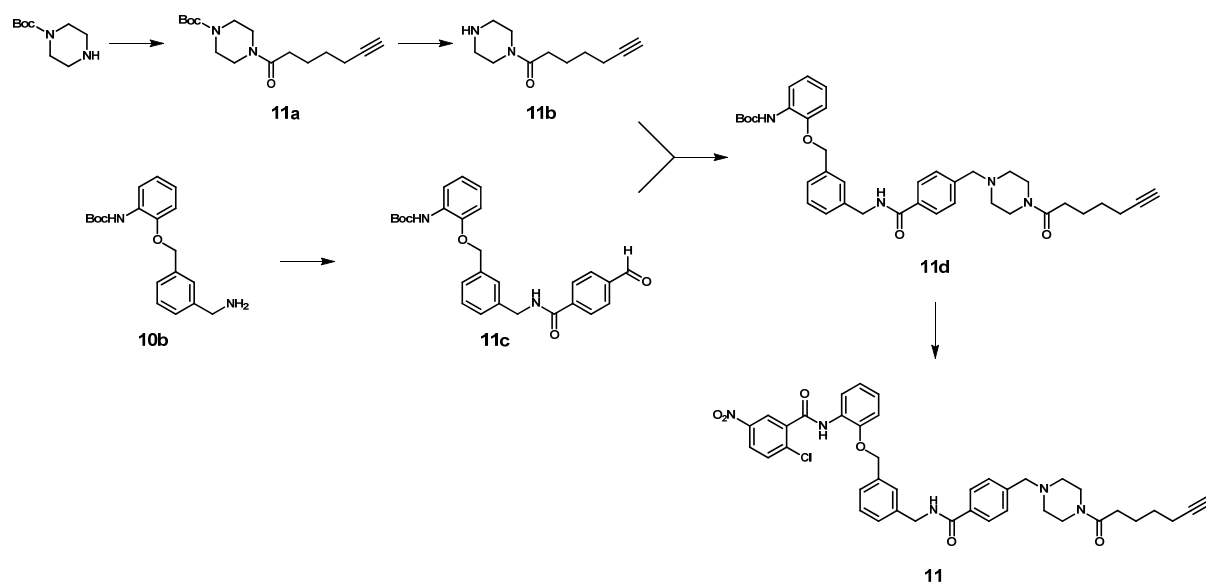

### Synthesis of 11a, *tert*-butyl 4-(hept-6-ynoyl)piperazine-1-carboxylate

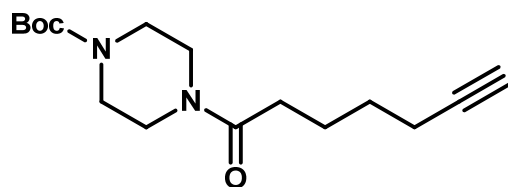

To a solution of 1-Boc-piperazine (1.00 g, 5.37 mmol) in dichloromethane (50 mL), 6-heptynoic acid (722 mg, 6.44 mmol), 1-ethyl-3-(3-dimethylaminopropyl)carbodiimide hydrochloride (1.23 g, 6.44 mmol), triethylamine (0.897 mL, 6.44 mmol), and 4-dimethylaminopyridine (65.6 mg, 0.537 mmol) were added, and the mixture was stirred at room temperature for 12 h. The crude mixture was worked up with dichloromethane and saturated aqueous NaHCO<sub>3</sub>, and the organic layer was washed by brine. The combined organic layer was dried over anhydrous Na<sub>2</sub>SO<sub>4</sub>(s) and filtered through a celite-packed glass filter. The filtrate was concentrated under the reduced pressure and purified by silica-gel flash column

chromatography (1:10 = MeOH:CH<sub>2</sub>Cl<sub>2</sub>, v/v) to obtain **11a** (1.50 g). Yield: 95% as light yellow solid; <sup>1</sup>H NMR (400 MHz, CDCl<sub>3</sub>) δ 3.59 (t, *J* = 4.8 Hz, 2H), 3.45 (s, 4H), 3.40 (t, *J* = 4.8 Hz, 2H), 2.36 (t, *J* = 7.2 Hz, 2H), 2.23 (td, *J* = 7.2, 2.4 Hz, 2H), 1.95 (t, *J* = 2.8 Hz, 1H), 1.77 (p, *J* = 7.2 Hz, 2H), 1.59 (p, *J* = 7.2 Hz, 2H), 1.47 (s, 9H); <sup>13</sup>C NMR (100 MHz, CDCl<sub>3</sub>) δ 171.4, 154.8, 84.1, 80.4, 68.7, 45.5, 41.5, 32.9, 28.5, 28.1, 24.3, 18.3; LRMS (ESI) *m/z* calcd for C<sub>16</sub>H<sub>27</sub>N<sub>2</sub>O<sub>3</sub> [M+H]<sup>+</sup>: 295.20; Found: 295.20.

### Synthesis of **11b**, 1-(piperazin-1-yl)hept-6-yn-1-one

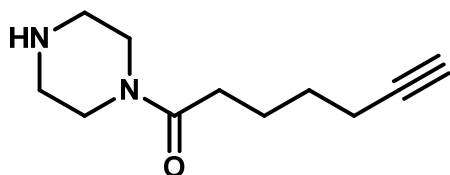

After **11a** (1.00 g, 3.40 mmol) was treated with 10% trifluoroacetic acid in dichloromethane (50 mL) at room temperature for 12 h, the reaction mixture was washed with saturated aqueous NaHCO<sub>3</sub> three times, and concentrated under the reduced pressure to obtain **11** (530 mg). Yield: 80% as yellow oil; <sup>1</sup>H NMR (400 MHz, CDCl<sub>3</sub>) δ 3.60 (t, *J* = 4.8 Hz, 2H), 3.46 (t, *J* = 4.8 Hz, 2H), 2.86 (m, 4H), 2.74 (brs, 1H), 2.35 (t, *J* = 7.2 Hz, 2H), 2.23 (td, *J* = 7.2, 2.8 Hz, 2H), 1.95 (t, *J* = 2.4 Hz, 1H), 1.76 (p, *J* = 7.2 Hz, 2H), 1.59 (p, *J* = 7.2 Hz, 2H); <sup>13</sup>C NMR (100 MHz, CDCl<sub>3</sub>) δ 171.1, 84.0, 68.6, 46.6, 46.2, 45.7, 42.4, 32.6, 28.0, 24.3, 18.2; LRMS (ESI) *m/z* calcd for C<sub>11</sub>H<sub>19</sub>N<sub>2</sub>O [M+H]<sup>+</sup>: 195.15; Found: 195.20.

**Synthesis of 11c**, *tert*-butyl (2-((3-((4-formylbenzamido)methyl)benzyl)oxy)phenyl) carbamate

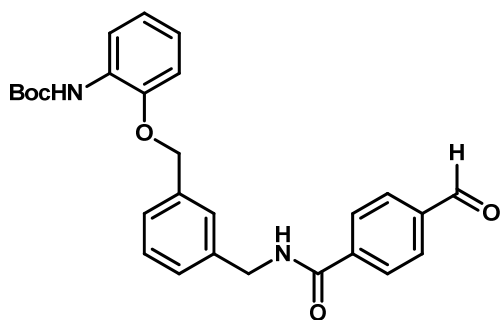

To a solution of **10b** (120 mg, 0.36 mmol) in dichloromethane (10 mL), 4-formyl benzoic acid (66 mg, 0.44 mmol), 1-ethyl-3-(3-dimethylaminopropyl)carbodiimide hydrochloride (84 mg, 0.44 mmol), triethylamine (0.10 mL, 0.73 mmol), and 4-dimethylaminopyridine (4.5 mg, 0.036 mmol) were added, and the mixture was stirred at room temperature for 12 h. The crude mixture was worked up with dichloromethane and saturated aqueous NaHCO<sub>3</sub>, and the organic layer was washed by brine. The combined organic layer was dried over anhydrous Na<sub>2</sub>SO<sub>4</sub>(s) and filtered through a celite-packed glass filter. The filtrate was concentrated under the reduced pressure and purified by silica-gel flash column chromatography (1:1 = ethyl acetate:*n*-hexane, v/v) to obtain **11c** (72 mg). Yield: 43% as off-white solid; <sup>1</sup>H NMR (400 MHz, CDCl<sub>3</sub>) δ 10.03 (s, 1H), 8.01 (s, 1H), 7.93 (d, *J* = 8.4 Hz, 2H), 7.89 (d, *J* = 8.4 Hz, 2H), 7.37–7.31 (m, 4H), 7.03 (s, 1H), 6.96–6.86 (m, 4H), 5.07 (s, 2H), 4.63 (d, *J* = 5.6 Hz, 2H), 1.48 (s, 9H); <sup>13</sup>C NMR (100 MHz, CDCl<sub>3</sub>) δ 191.6, 166.4, 152.9, 146.8, 139.5, 138.5, 138.3, 137.2, 129.9, 129.3, 128.5, 127.93, 127.88, 127.1, 127.0, 122.6, 121.7, 118.7, 112.1, 80.6, 70.9, 44.2, 28.4; LRMS (ESI) *m/z* calcd for C<sub>27</sub>H<sub>29</sub>N<sub>2</sub>O<sub>5</sub> [M+H]<sup>+</sup>: 461.21; Found: 461.30.

**Synthesis of 11d**, *tert*-butyl (2-((3-((4-((4-(hept-6-ynoyl)piperazin-1-yl)methyl)benzamido)methyl)benzyl)oxy)phenyl)carbamate

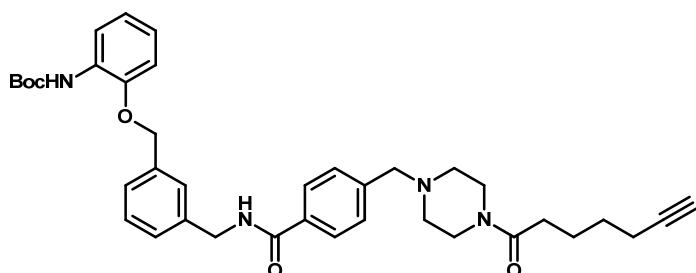

To a solution of **11b** (46 mg, 0.23 mmol) in dichloromethane (10 mL), **11c** (72 mg, 0.16 mmol), and sodium triacetoxyborohydride (33

mg, 0.16 mmol) were added, and the mixture was stirred under argon atmosphere at room temperature for 12 h. The crude mixture was worked up with dichloromethane and saturated aqueous NaHCO<sub>3</sub>, and the organic layer was washed by brine. The combined organic layer was dried over anhydrous Na<sub>2</sub>SO<sub>4</sub>(s) and filtered through a celite-packed glass filter. The filtrate was concentrated under the reduced pressure and purified by silica-gel flash column chromatography (1:10 = MeOH:CH<sub>2</sub>Cl<sub>2</sub>, v/v) to obtain **11d** (95 mg). Yield: 95% as light yellow solid; <sup>1</sup>H NMR (400 MHz, CDCl<sub>3</sub>) δ 8.05 (s, 1H), 7.77 (d, *J* = 7.6 Hz, 2H), 7.39–7.32 (m, 6H), 7.06 (s, 1H), 6.92–6.85 (m, 3H), 6.82 (t, *J* = 5.2 Hz, 1H), 5.08 (s, 2H), 4.64 (d, *J* = 5.2 Hz, 2H), 3.60 (brs, 2H), 3.54 (s, 2H), 3.45 (brs, 2H), 2.42–2.38 (m, 4H), 2.32 (t, *J* = 7.6 Hz, 2H), 2.20 (td, *J* = 7.2, 2.8 Hz, 2H), 1.94 (t, *J* = 2.8 Hz, 1H), 1.74 (p, *J* = 7.2 Hz, 2H), 1.56 (p, *J* = 7.2 Hz, 2H), 1.50 (s, 9H); <sup>13</sup>C NMR (100 MHz, CDCl<sub>3</sub>) δ 171.2, 167.2, 152.8, 146.7, 141.7, 139.0, 137.1, 133.3, 129.17, 129.13, 128.5, 127.7, 127.2, 127.0, 126.7, 126.6, 122.4, 121.6, 118.5, 111.9, 84.1, 80.5, 70.8, 68.7, 62.4, 53.2, 52.8, 45.6, 43.9, 41.5, 32.7, 28.4, 28.1, 24.3, 18.2; LRMS (ESI) *m/z* calcd for C<sub>38</sub>H<sub>47</sub>N<sub>4</sub>O<sub>5</sub> [M+H]<sup>+</sup>: 639.35; Found: 639.40.

**Synthesis of 11**, 2-chloro-*N*-(2-((3-((4-((4-(hept-6-ynoyl)piperazin-1-yl)methyl)benzamido)methyl)benzyl)oxy)phenyl)-5-nitrobenzamide

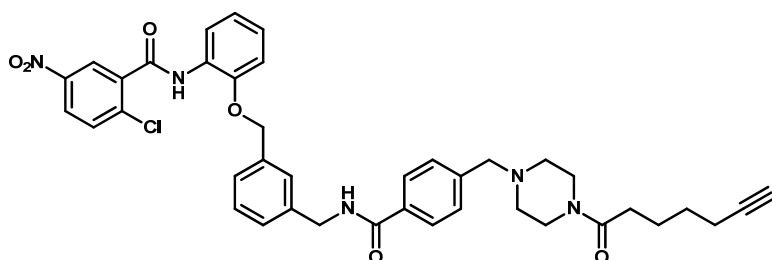

After **11d** (95 mg, 0.15 mmol) was treated with 10% trifluoroacetic acid in DCM (10 mL) at room temperature

for 1 h, the reaction mixture was washed with saturated aqueous NaHCO<sub>3</sub> three times, and concentrated under the reduced pressure to provide *N*-(3-((2-aminophenoxy)methyl)benzyl)-4-((4-(hept-6-ynoyl)piperazin-1-yl)methyl)benzamide.

To a solution of *N*-(3-((2-aminophenoxy)methyl)benzyl)-4-((4-(hept-6-ynoyl)piperazin-1-yl)methyl)benzamide in dichloromethane (10 mL), 2-chloro-5-nitrobenzoyl chloride (39 mg, 0.18 mmol) and triethylamine (41  $\mu$ L, 0.29 mmol) were added and the mixture was stirred at room temperature for 1 h. After removal of solvent and triethylamine under the reduced pressure, the residue was purified by silica-gel flash column chromatography (1:5 = MeOH:CH<sub>2</sub>Cl<sub>2</sub>, v/v) to obtain **11** (101 mg). Yield: 94% as light yellow solid; <sup>1</sup>H NMR (500 MHz, CDCl<sub>3</sub>)  $\delta$  8.71 (s, 1H), 8.63 (d, *J* = 2.0 Hz, 1H), 8.48 (dd, *J* = 8.0, 1.5 Hz, 1H), 8.18 (dd, *J* = 8.5, 2.5 Hz, 1H), 7.73 (d, *J* = 8.5 Hz, 2H), 7.55 (d, *J* = 9.0 Hz, 1H), 7.40–7.33 (m, 6H), 7.12 (td, *J* = 7.5, 1.5 Hz, 1H), 7.07–7.00 (m, 2H), 6.54 (t, *J* = 6.0 Hz, 1H), 5.13 (s, 2H), 4.65 (d, *J* = 6.0 Hz, 2H), 3.62 (brs, 2H), 3.56 (s, 2H), 3.47 (brs, 2H), 2.42 (brs, 4H), 2.33 (t, *J* = 7.5 Hz, 2H), 2.22 (td, *J* = 7.0, 2.5 Hz, 2H), 1.94 (t, *J* = 2.5 Hz, 1H), 1.75 (p, *J* = 7.5 Hz, 2H), 1.58 (p, *J* = 7.5 Hz, 2H); <sup>13</sup>C NMR (125 MHz, CDCl<sub>3</sub>)  $\delta$  171.2, 167.2, 161.6, 147.8, 146.8, 139.2, 137.6, 136.7, 136.3, 131.9, 129.4, 129.3, 128.1, 127.4, 127.2, 126.0, 125.2, 121.8, 120.8, 112.0,

84.2, 71.1, 68.7, 62.4, 53.3, 52.9, 45.6, 43.9, 41.8, 32.8, 28.2, 24.4, 18.3; LRMS (ESI)

*m/z* calcd for C<sub>40</sub>H<sub>41</sub>ClN<sub>5</sub>O<sub>6</sub> [M+H]<sup>+</sup>: 722.27; Found: 722.25.

## 7. Supplementary References

- 1 Y. Amano, T. Yamaguchi, T. Ohno, T. Niimi, M. Orita, H. Sakashita and M. Takeuchi, *Hypertens. Res.*, 2012, **35**, 715–719.
- 2 A. T. Brünger, *Nature*, 1992, **355**, 472–474.
- 3 V. B. Chen, W. B. 3<sup>rd</sup> Arendall, J. J. Headd, D. A. Keddy, R. M. Immormino, G. j. Kapral, L. W. Murray and D. C. Richardson, *Acta Cryst. D*, 2010, **66**, 12–21.
- 4 P. Emsley, B. Lohkamp, W.G. Scott and K. Cowtan, *Acta Cryst. D*, 2010, **66**, 486–501.
- 5 G. N. Murshudov, A. A. Vagin & E. J. Dodson, *Acta Cryst. D*, 1997, **53**, 240–255.
- 6 Z. Otwinowski and W. Minor, *Enzymol.*, 1997, **276**, 307–326.
- 7 A. Vagin and A. Teplyakov, *Acta Cryst. D*, 2010, **66**, 22–25.

## 8. $^1\text{H}$ and $^{13}\text{C}$ NMR spectra

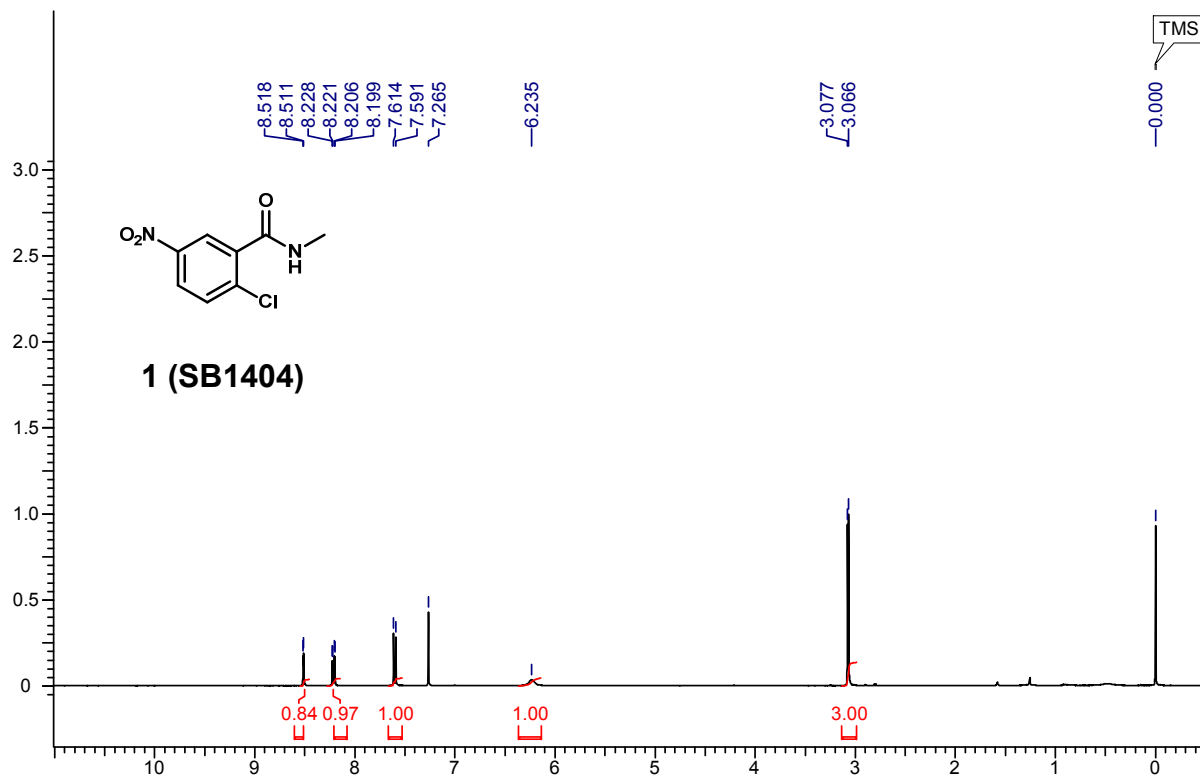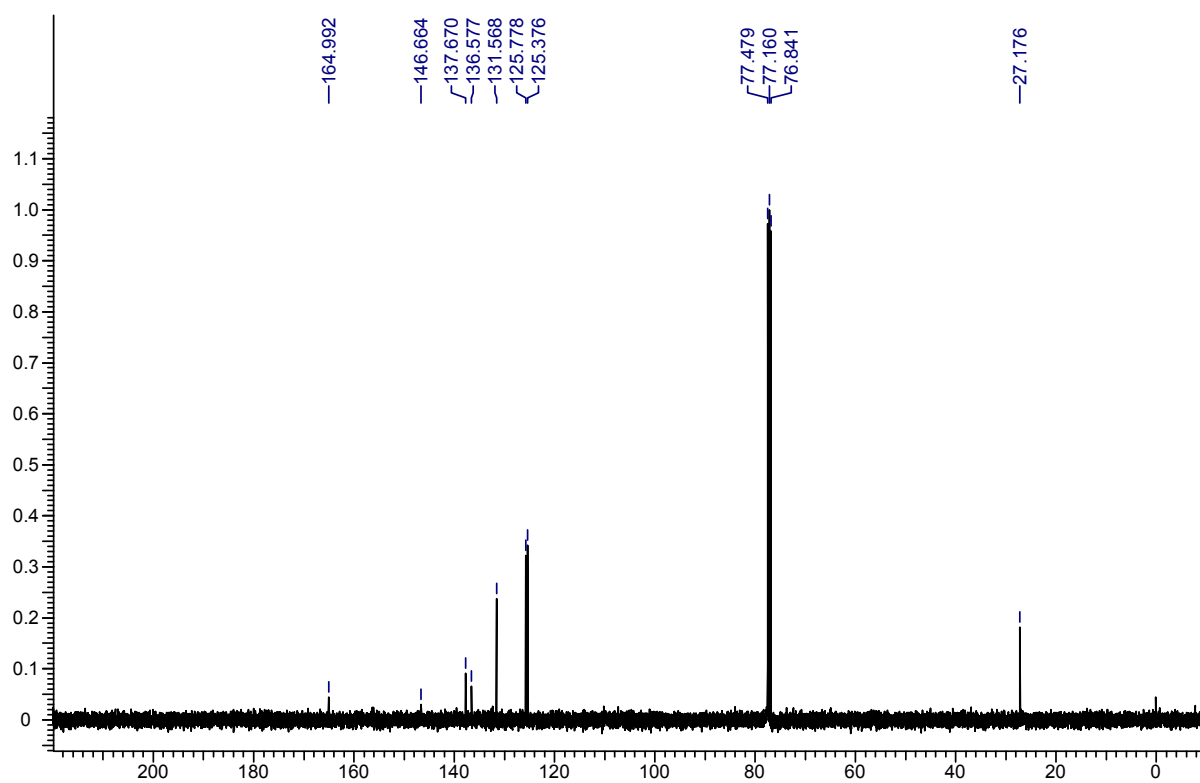



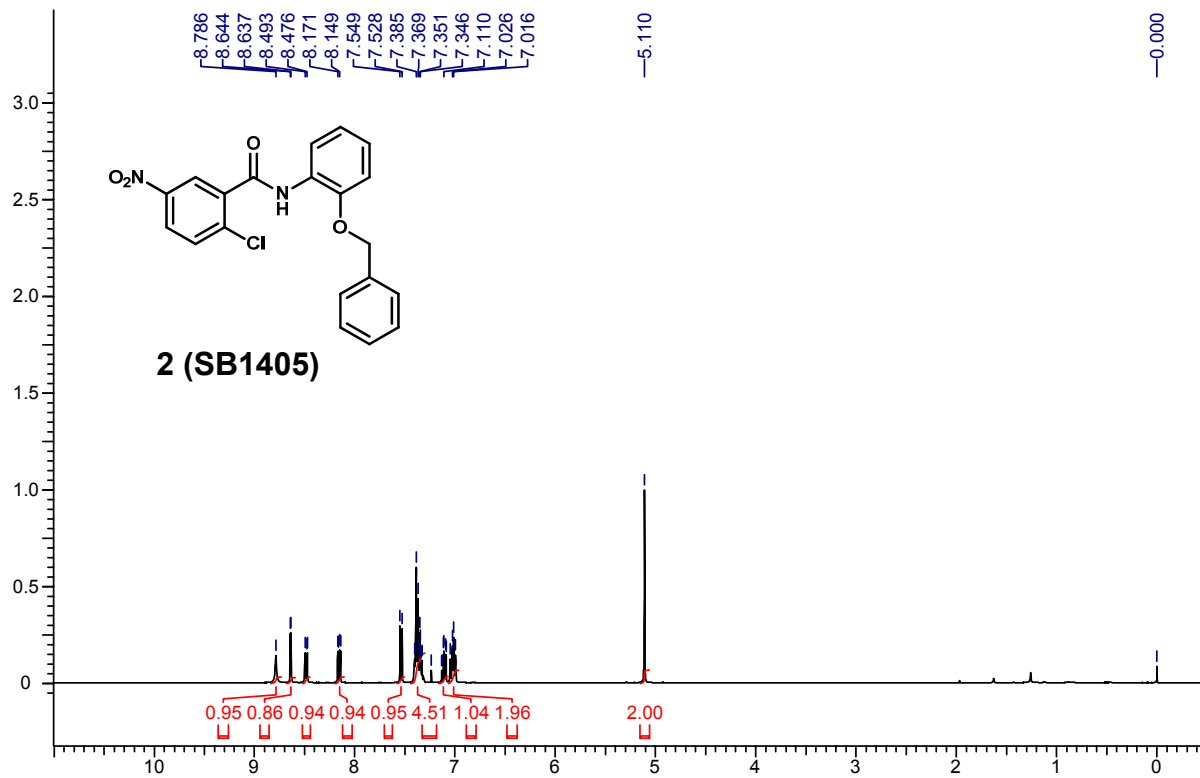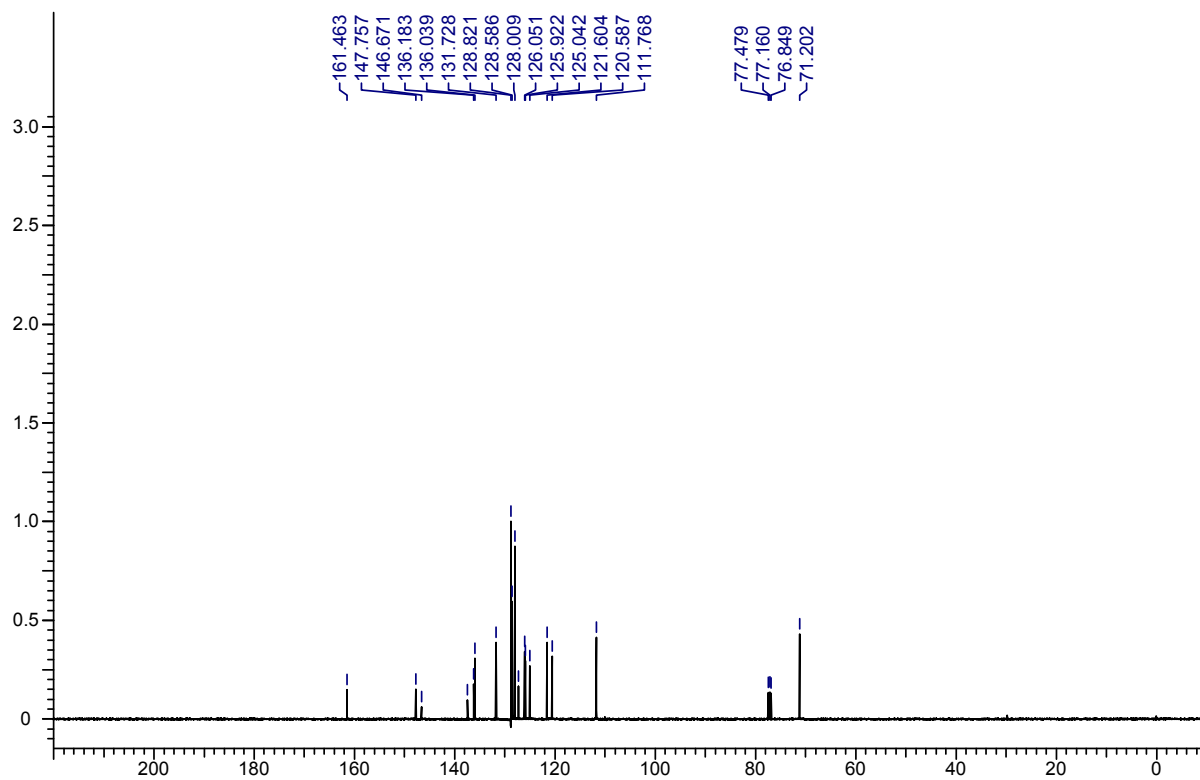

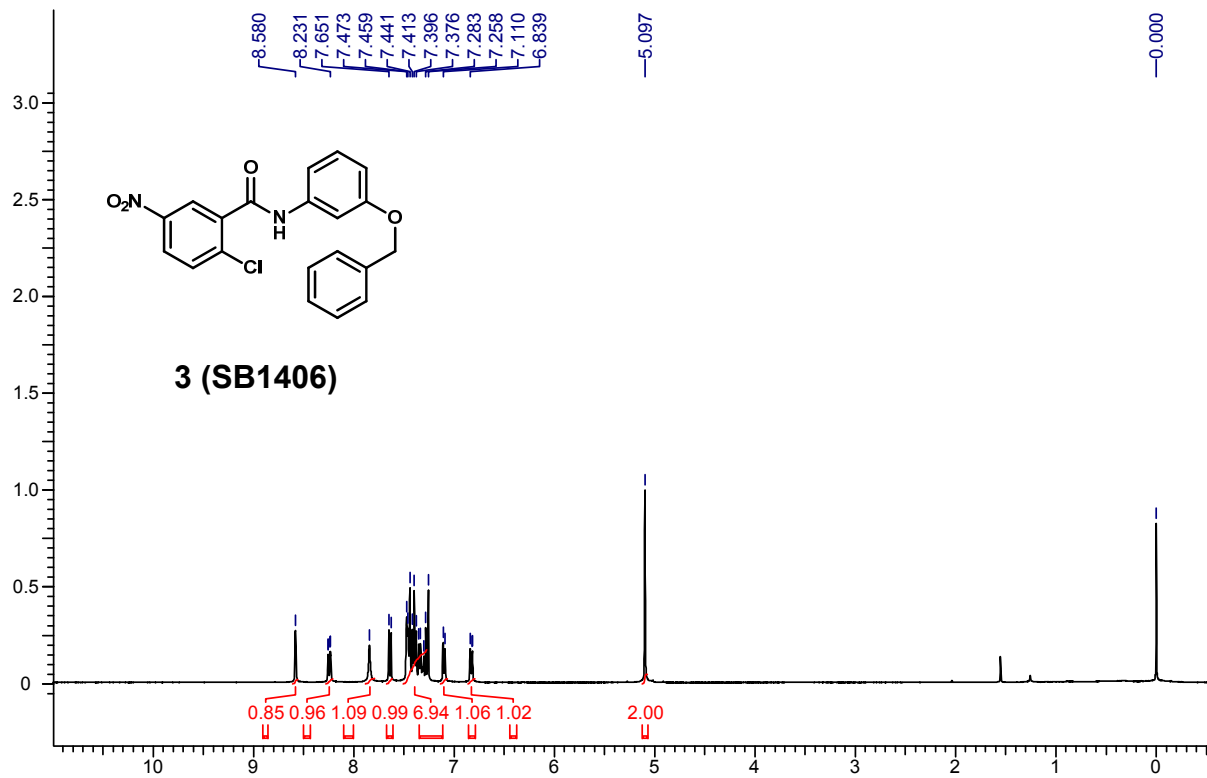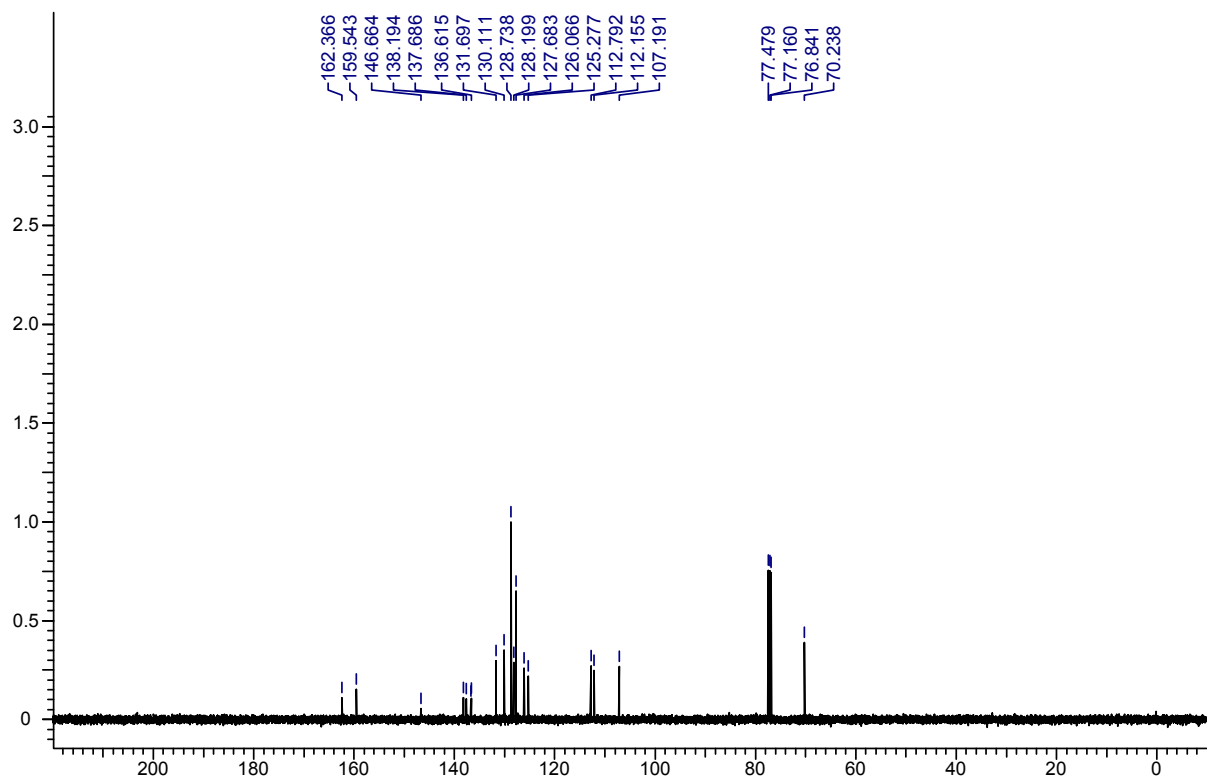

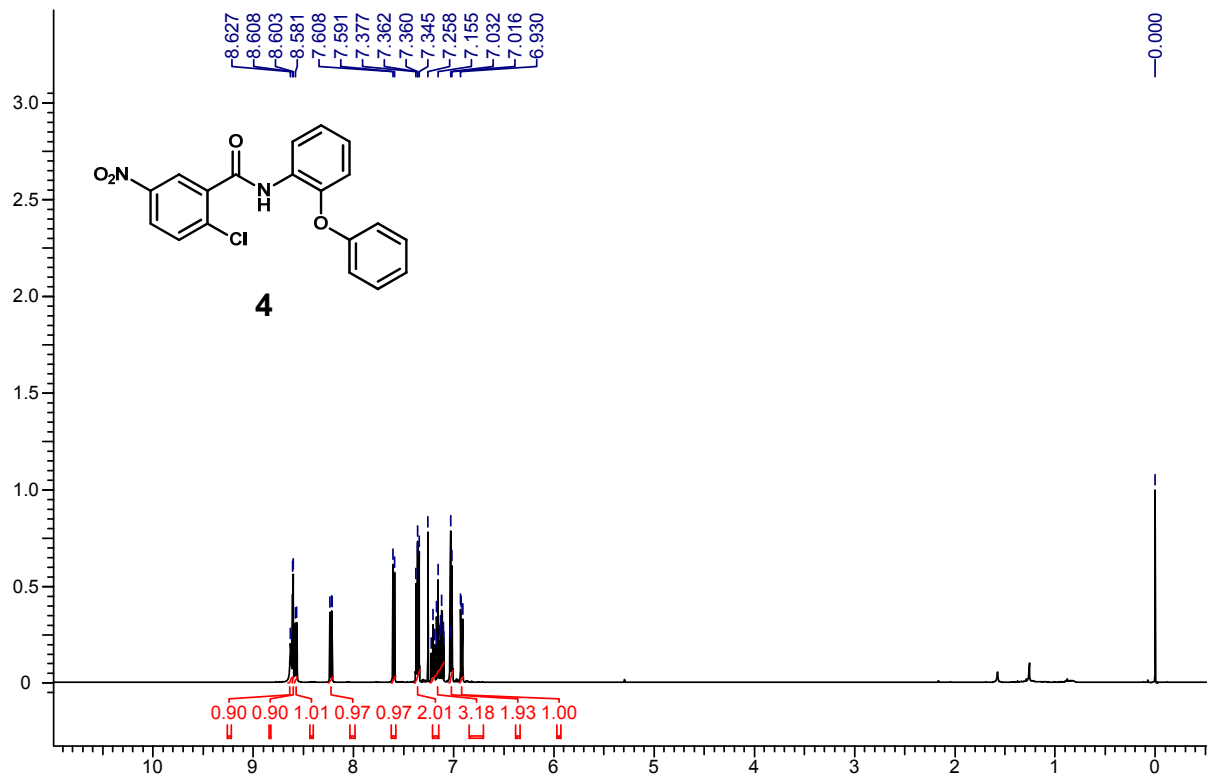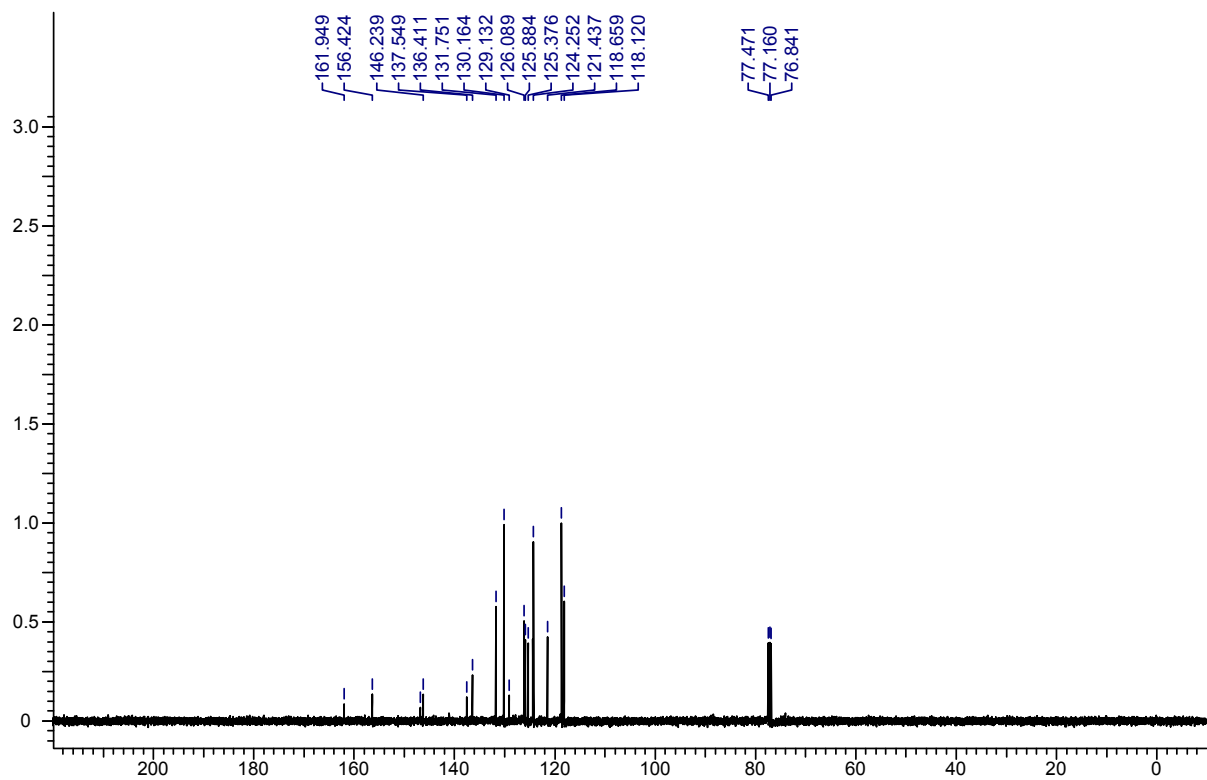

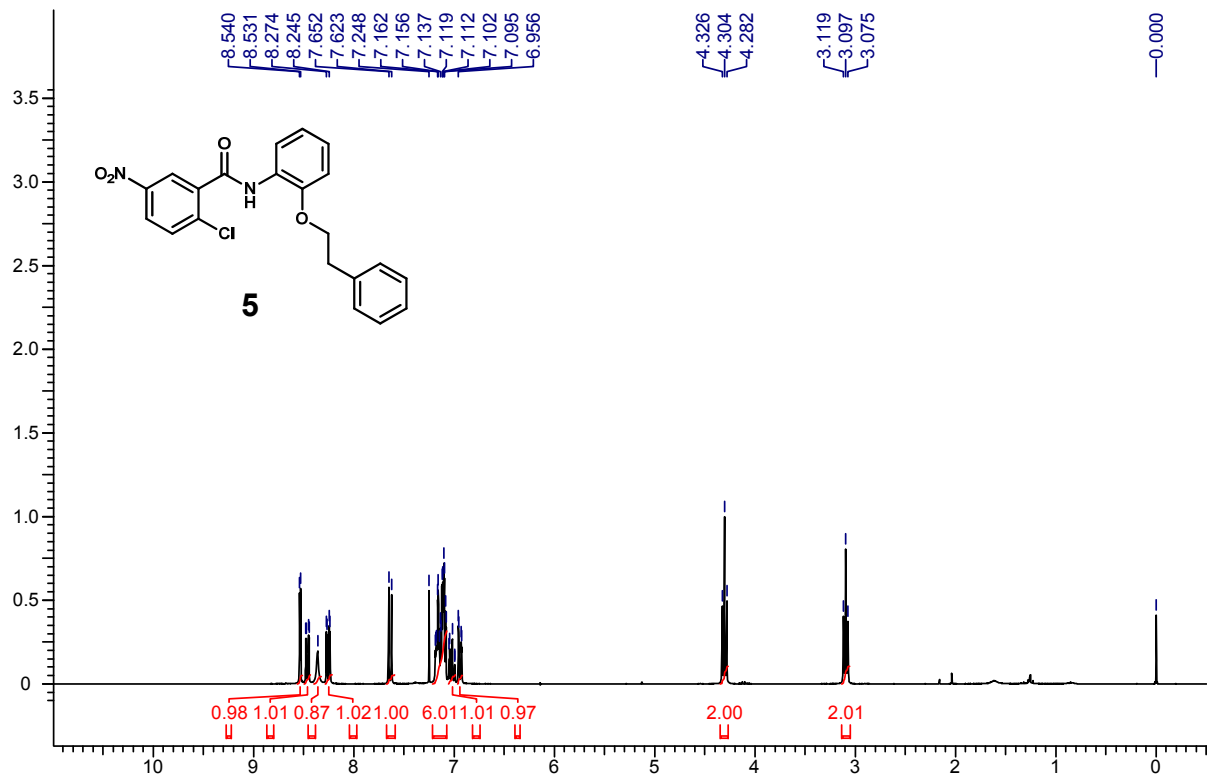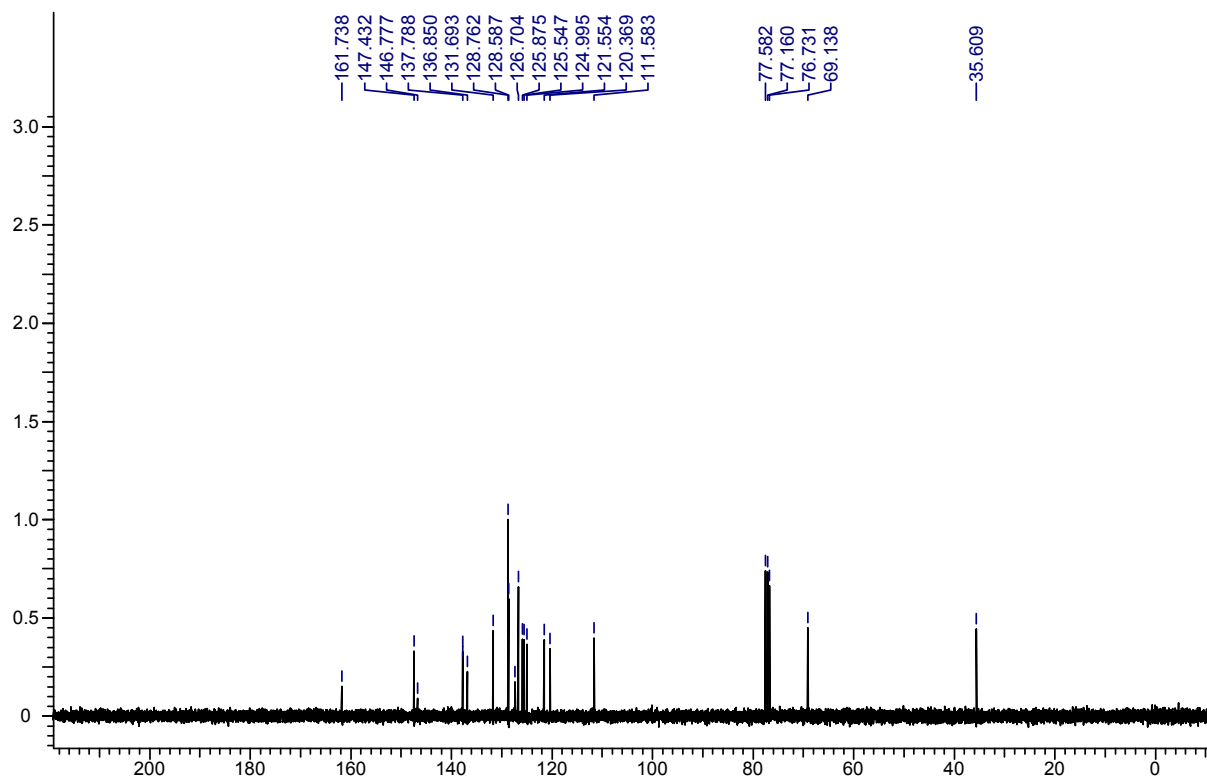

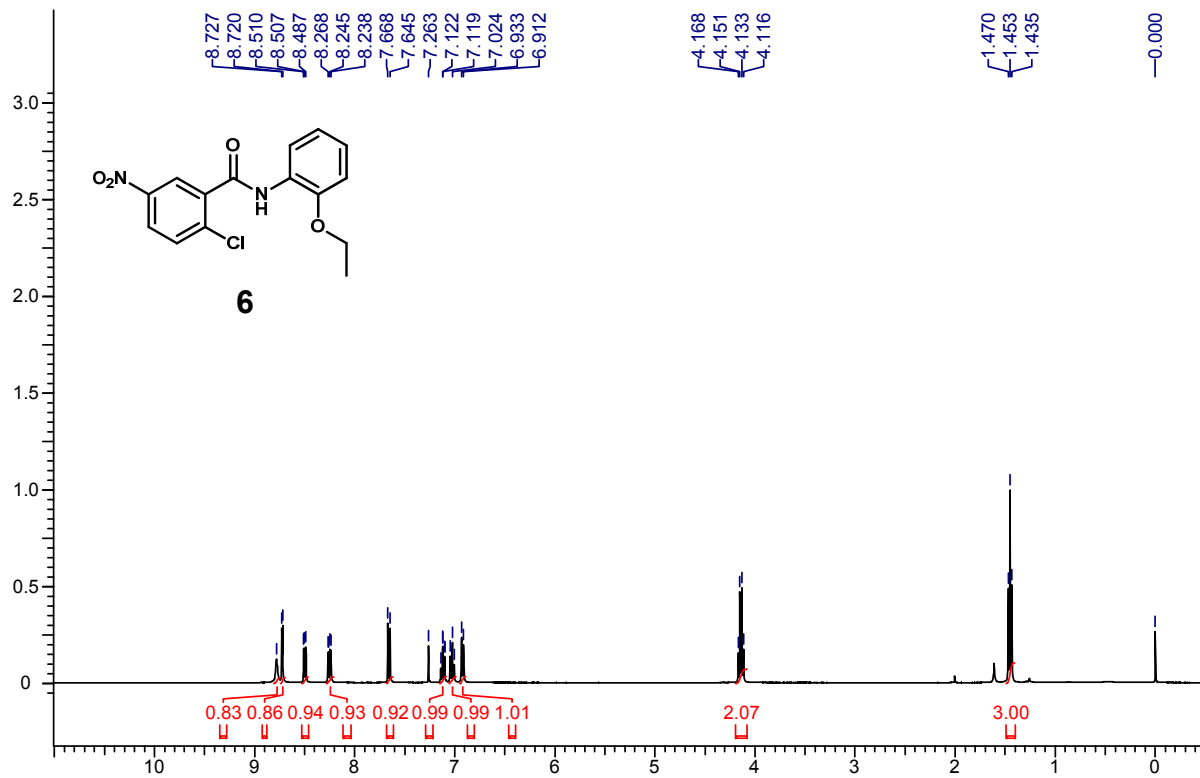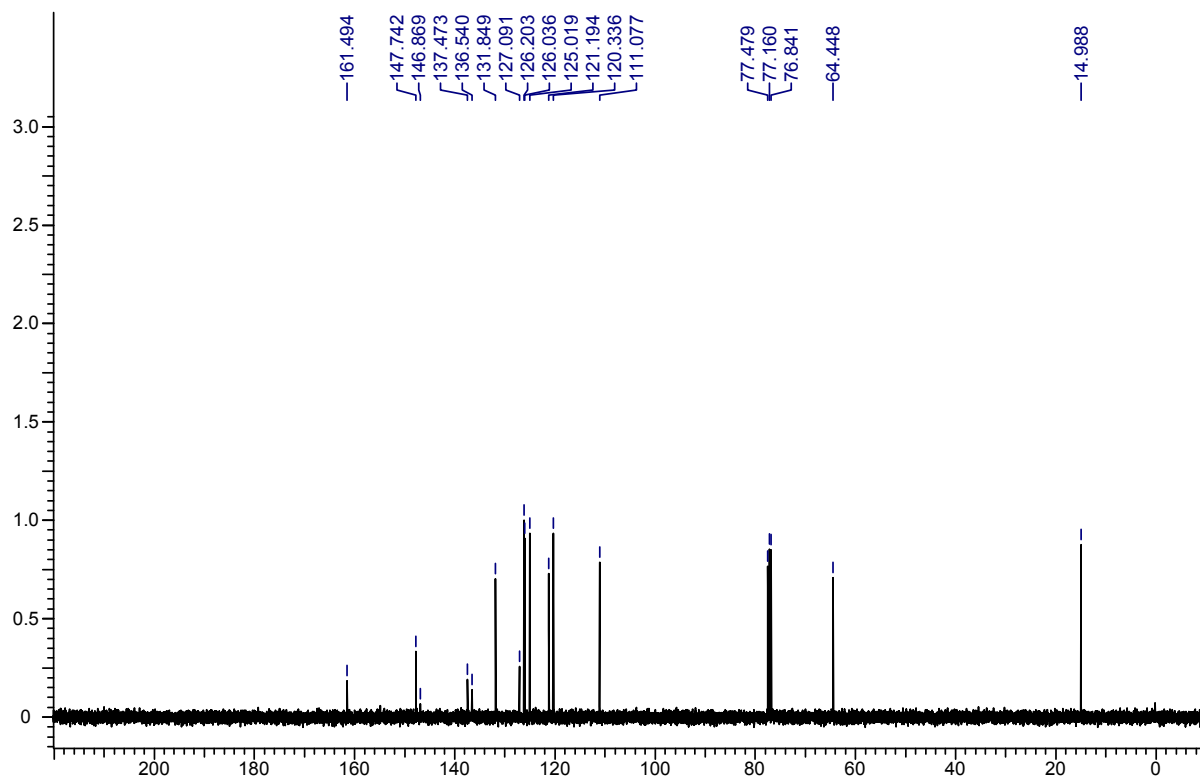

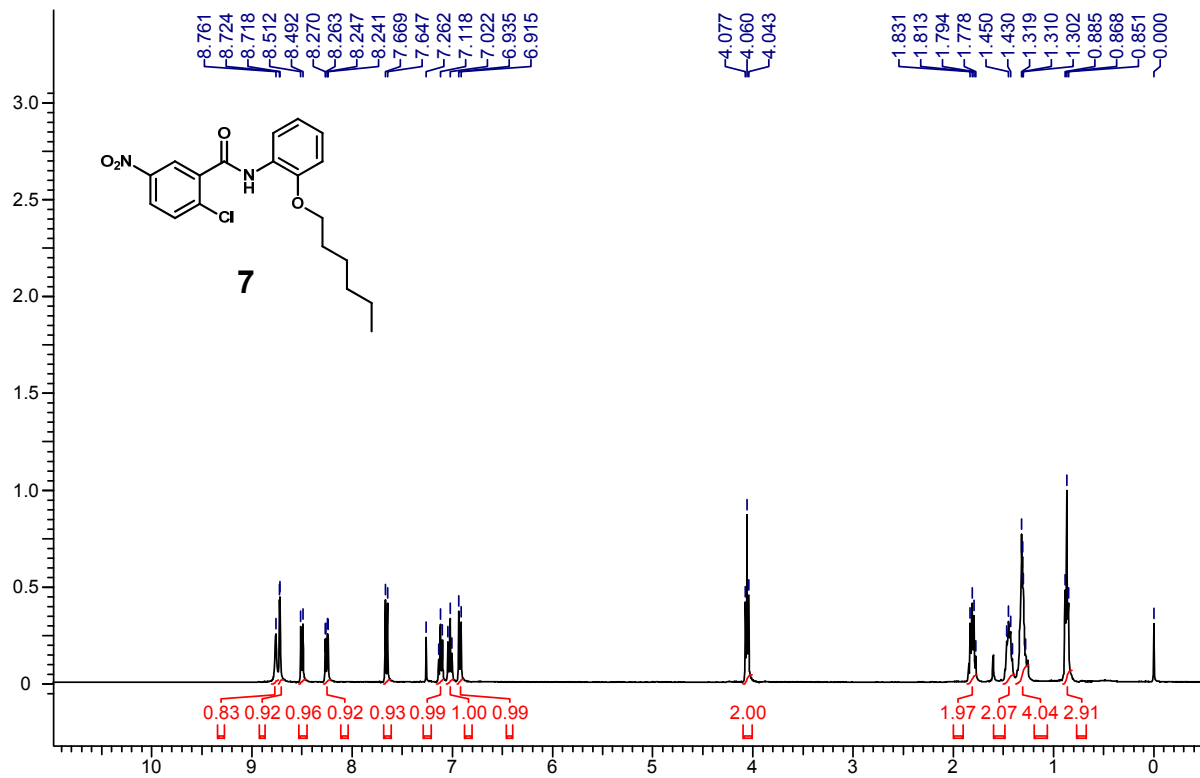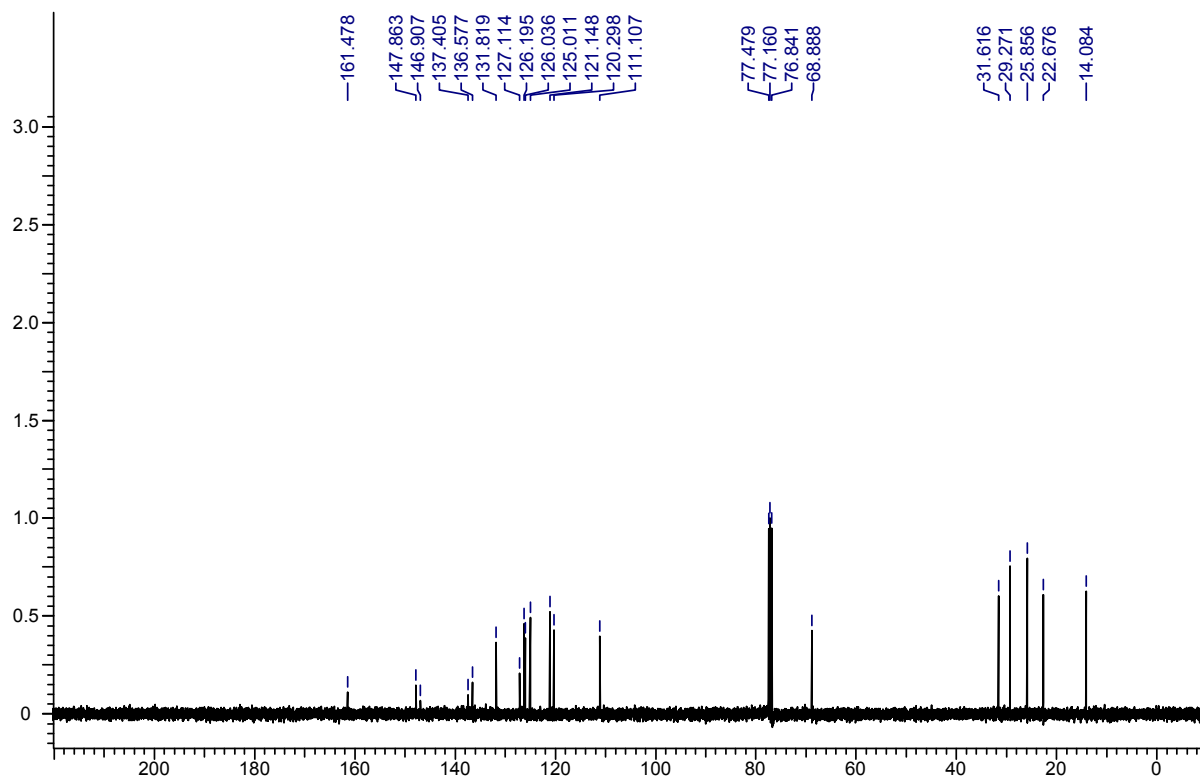

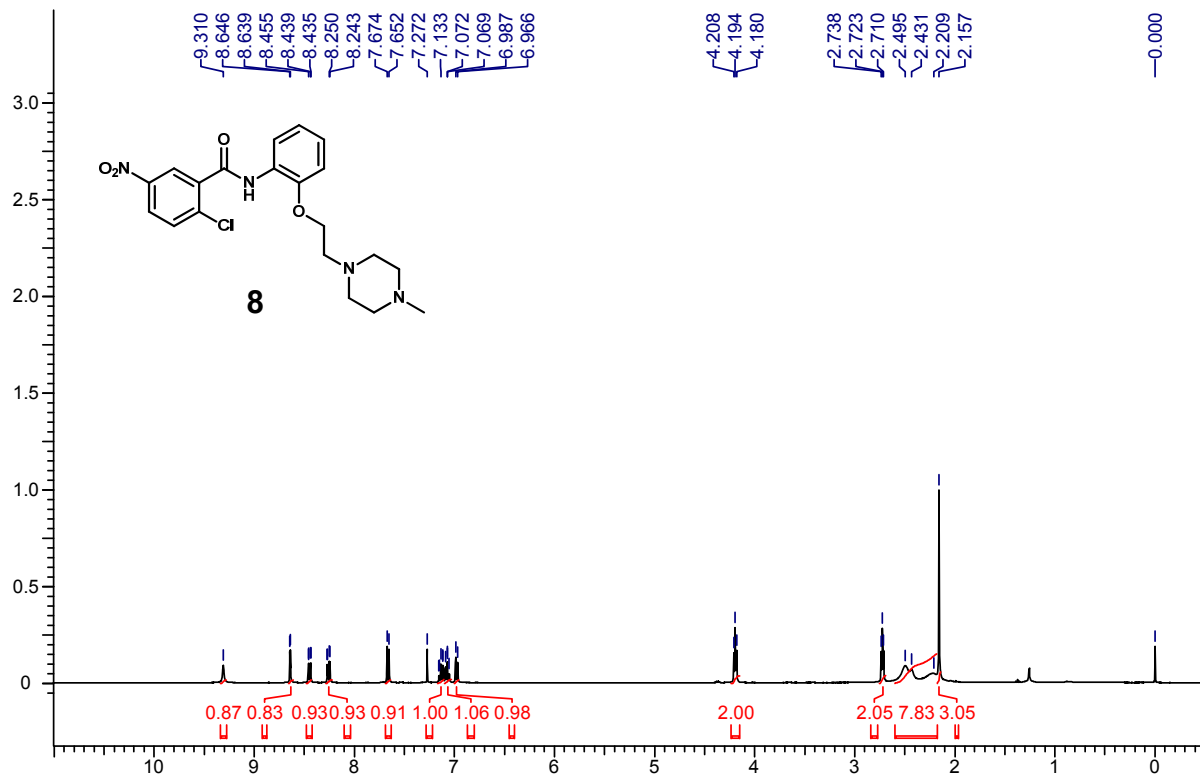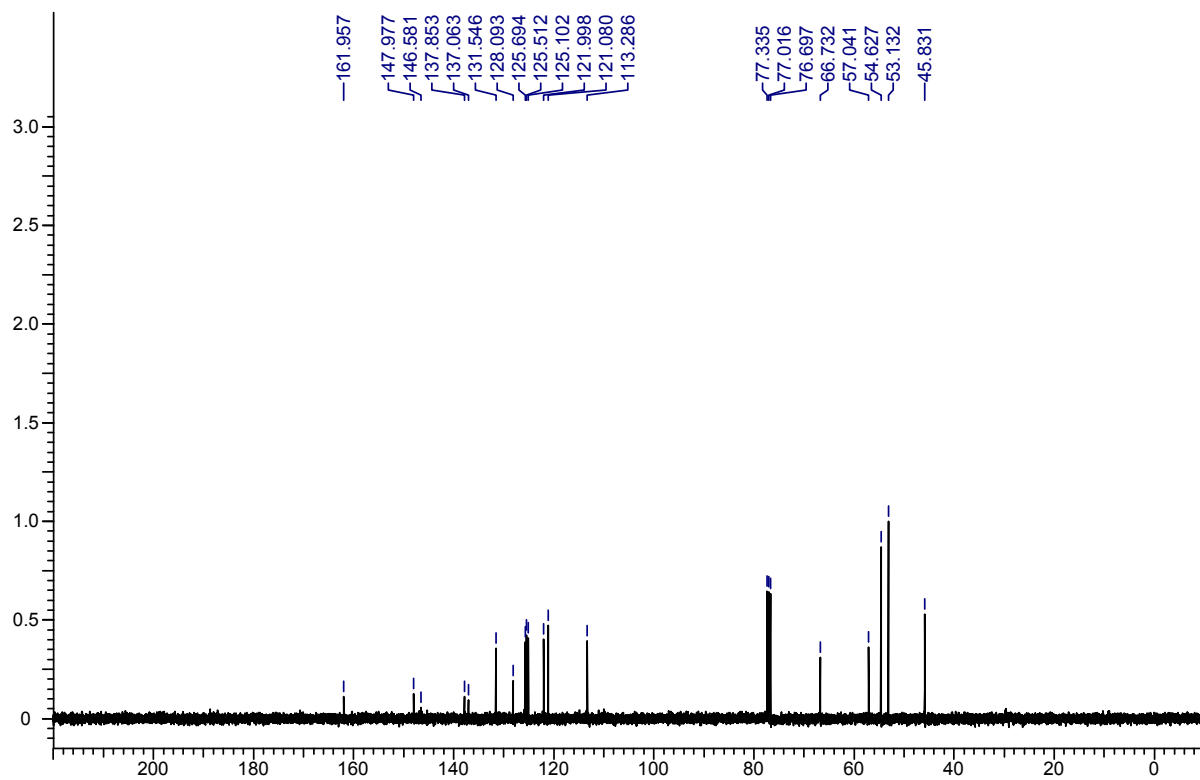

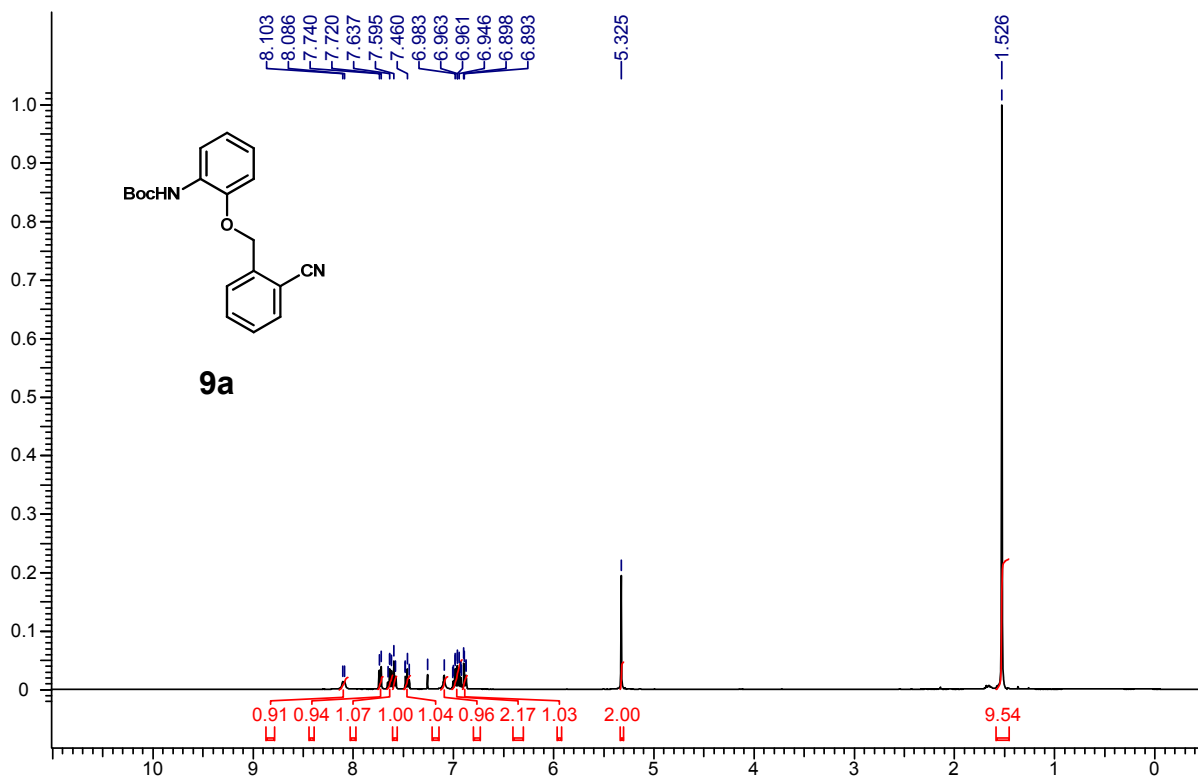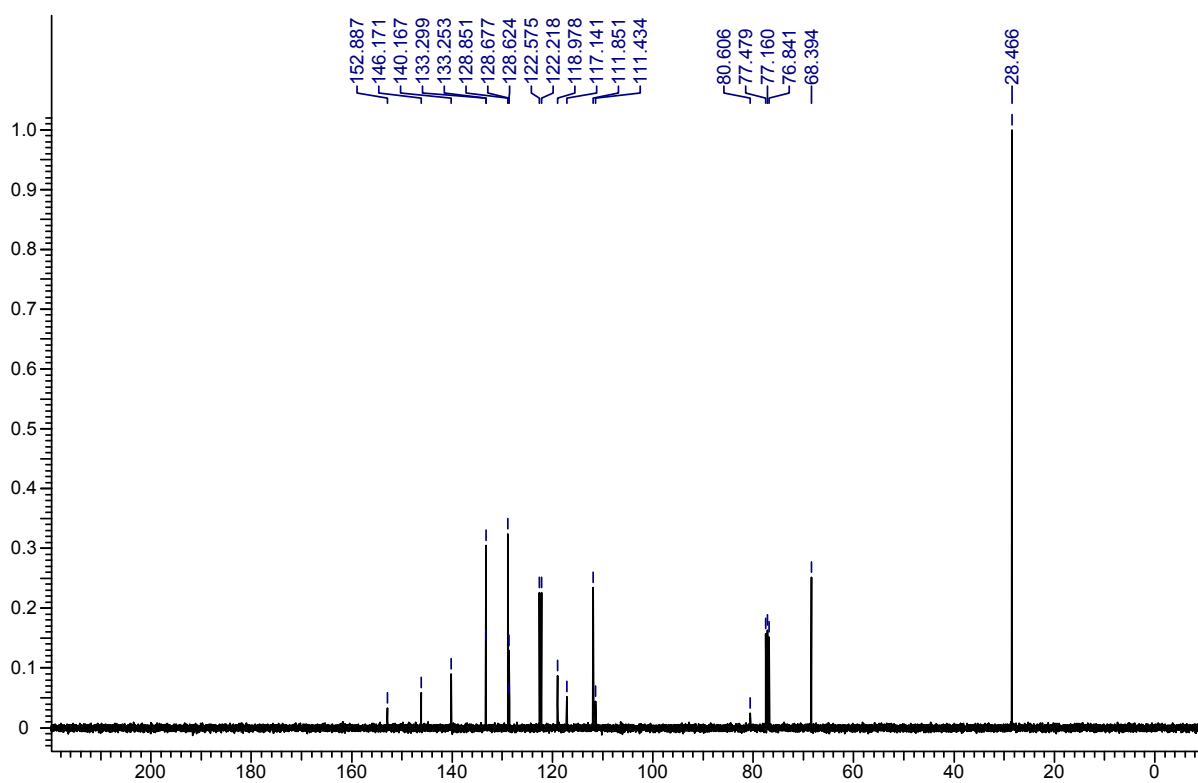



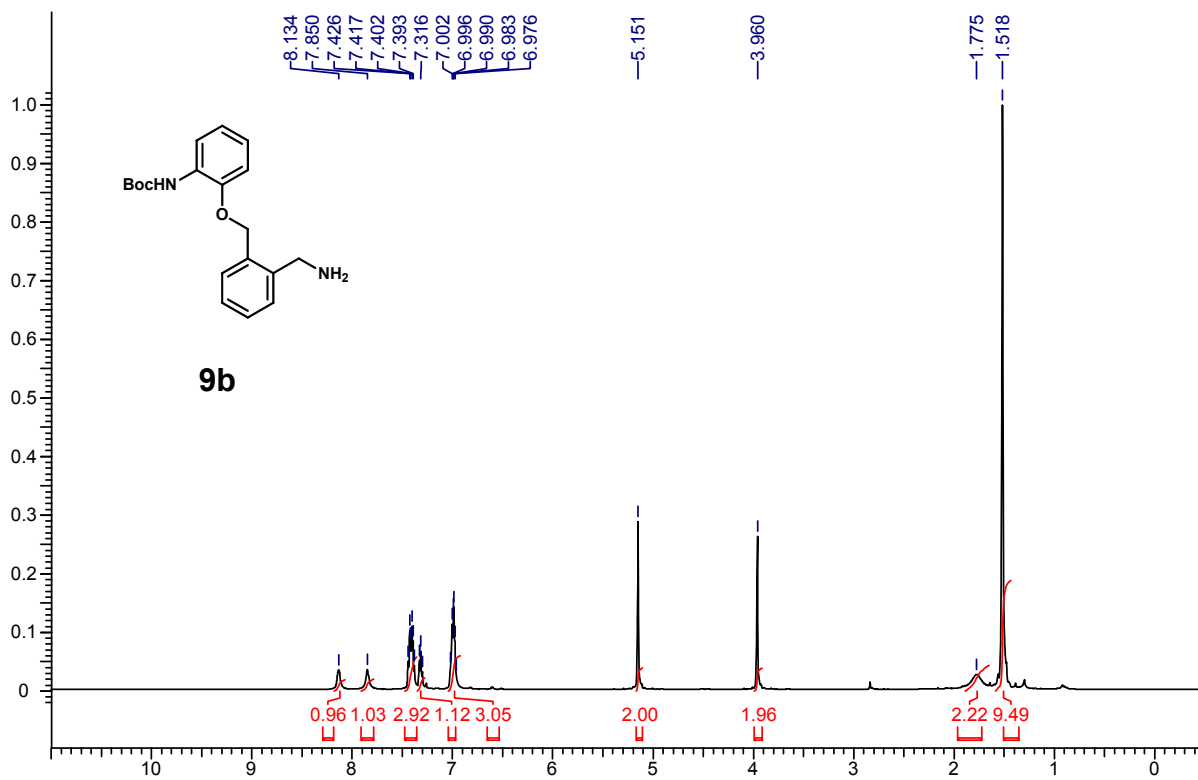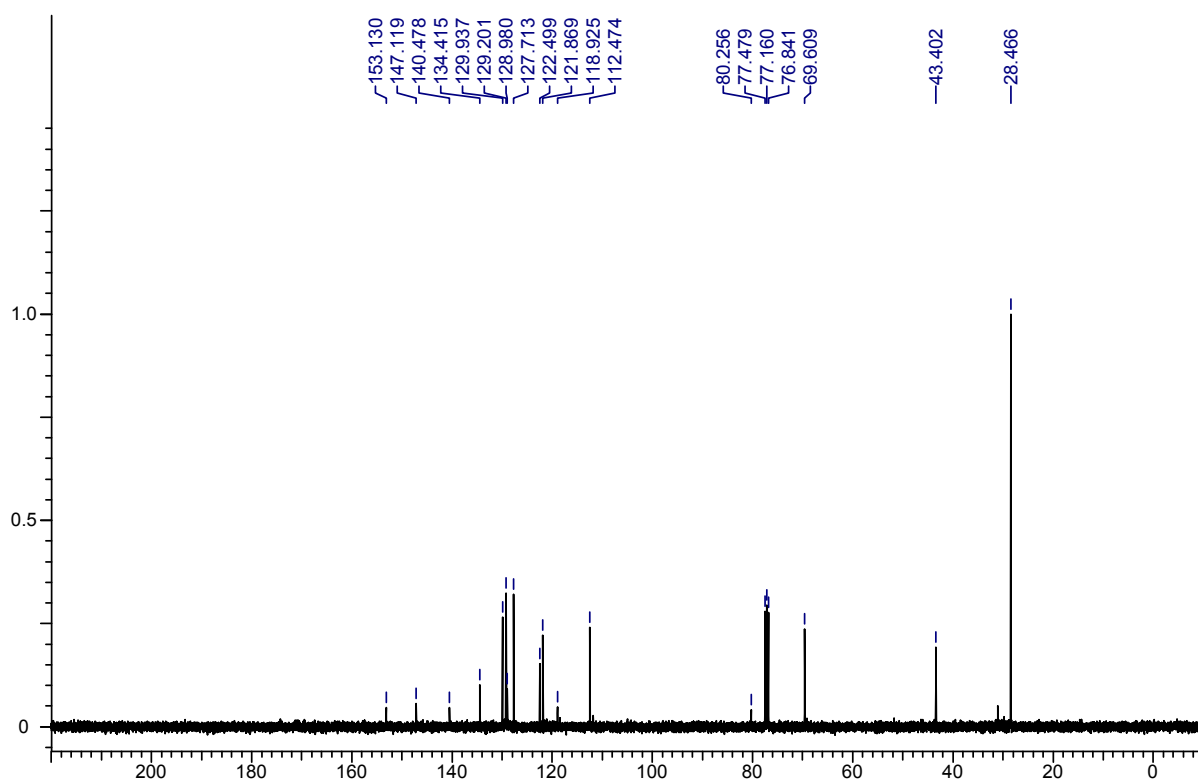

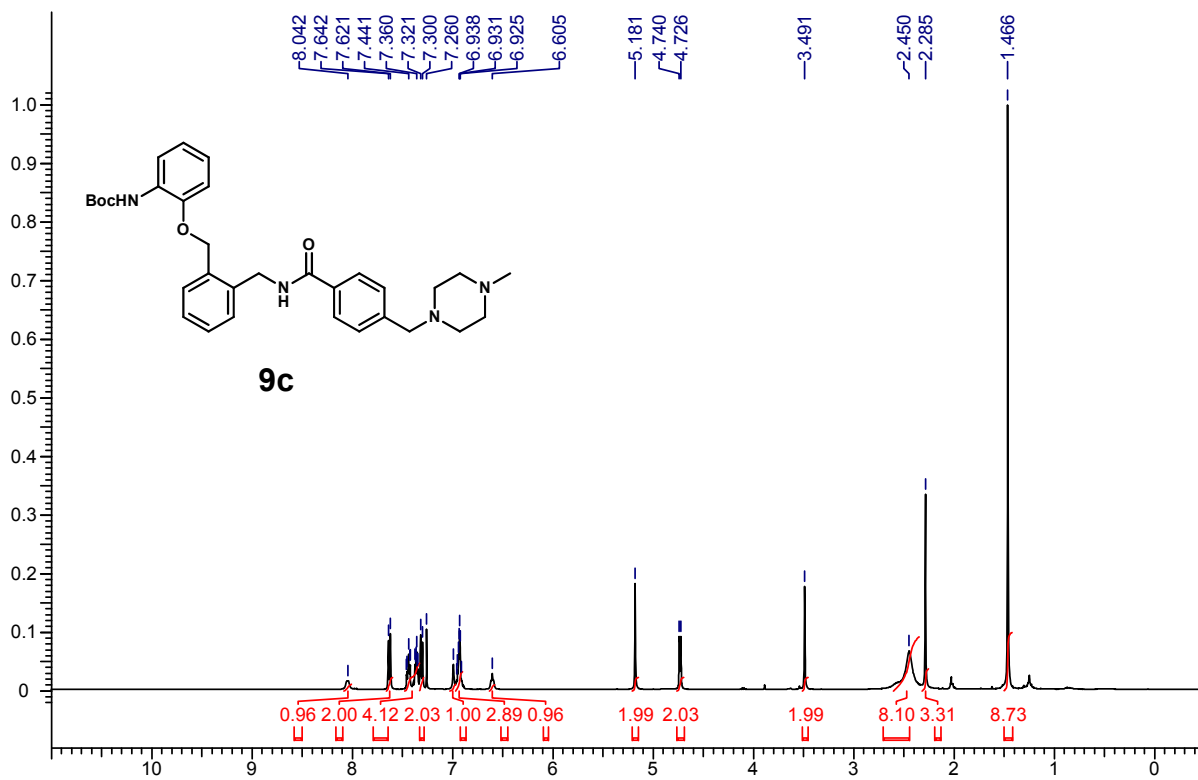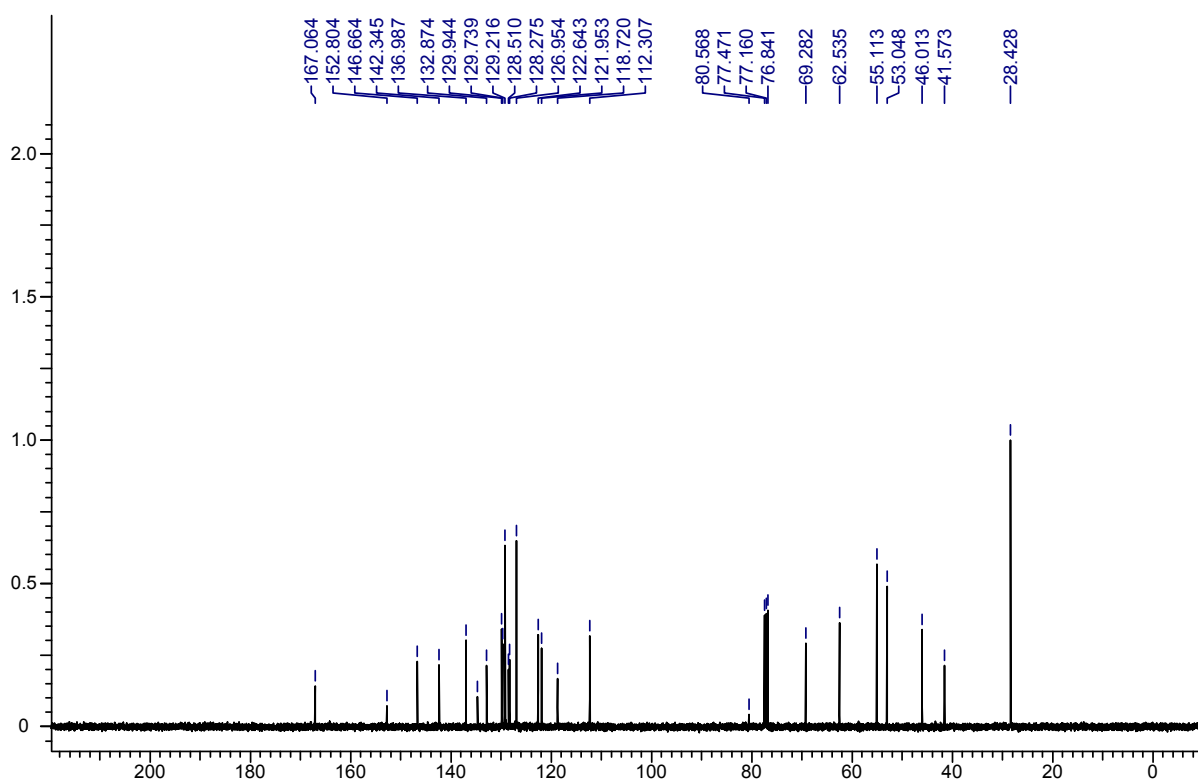

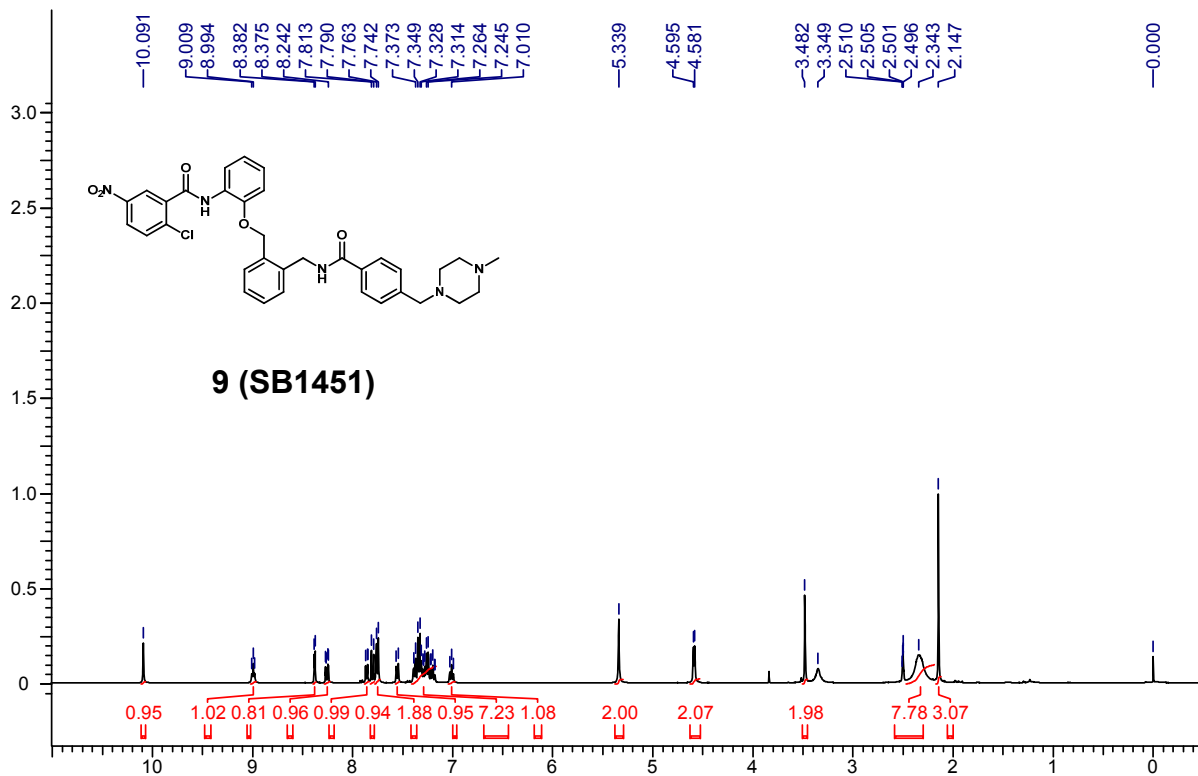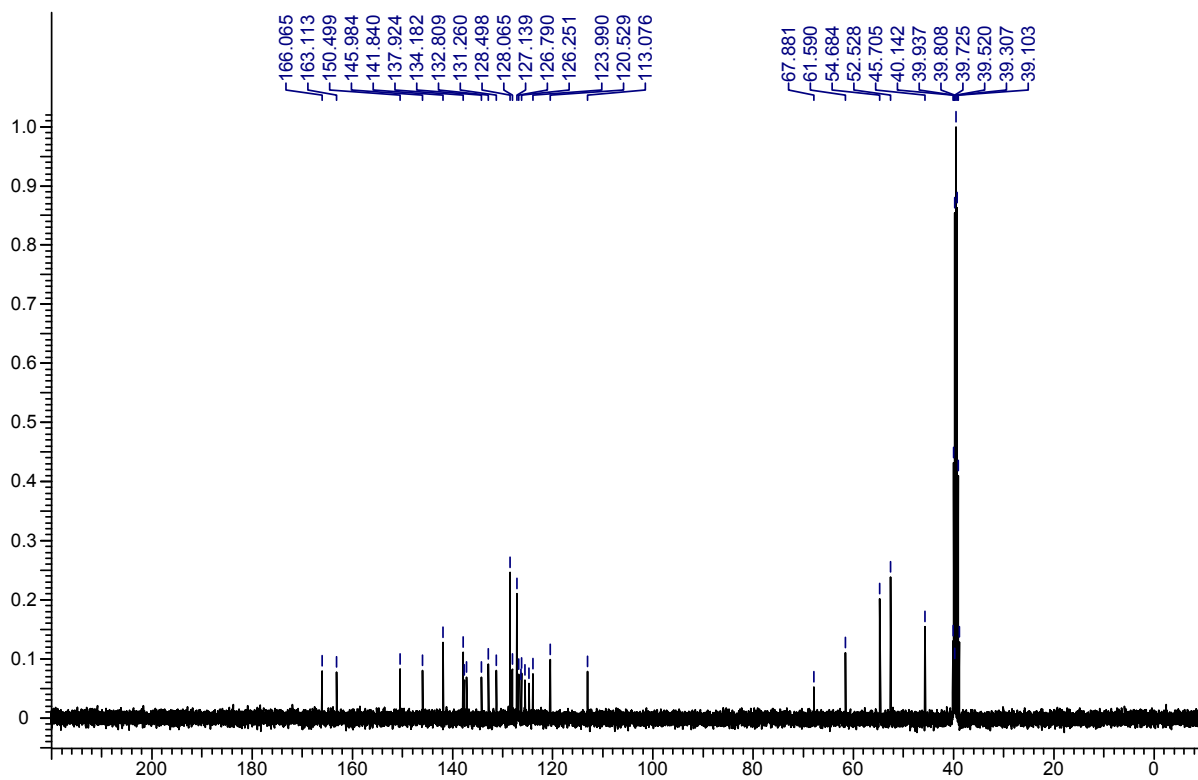

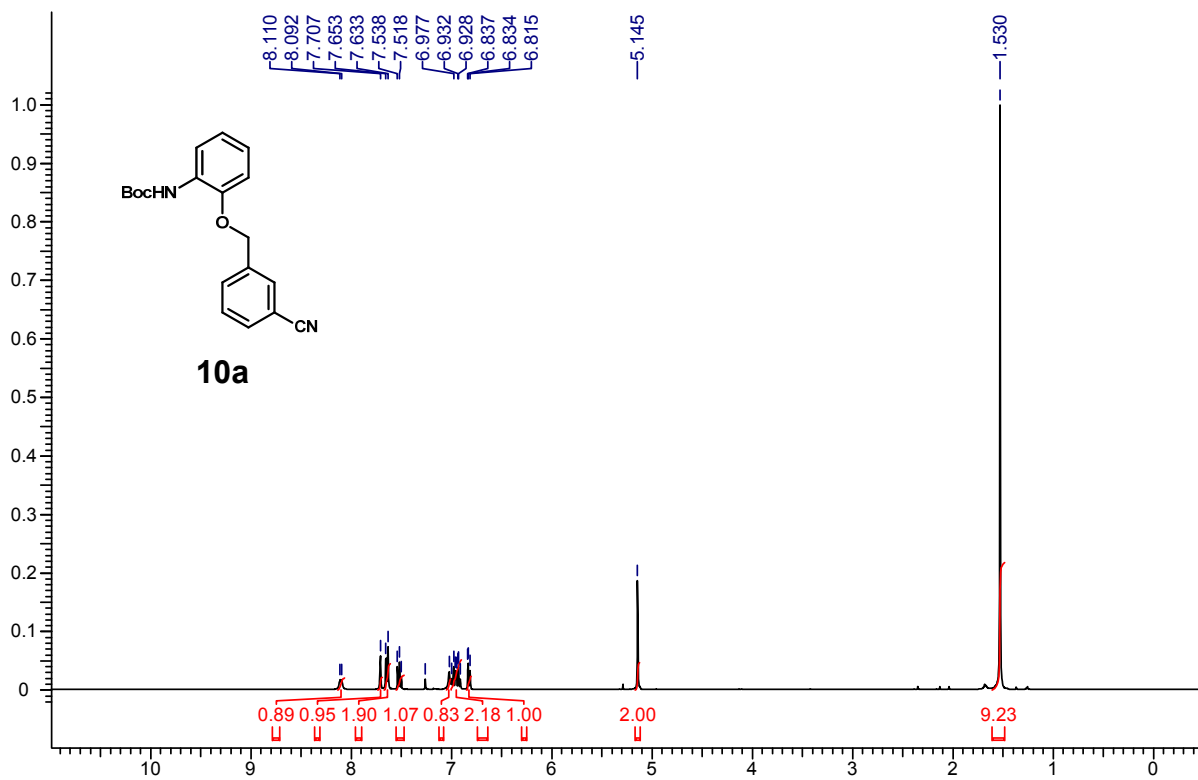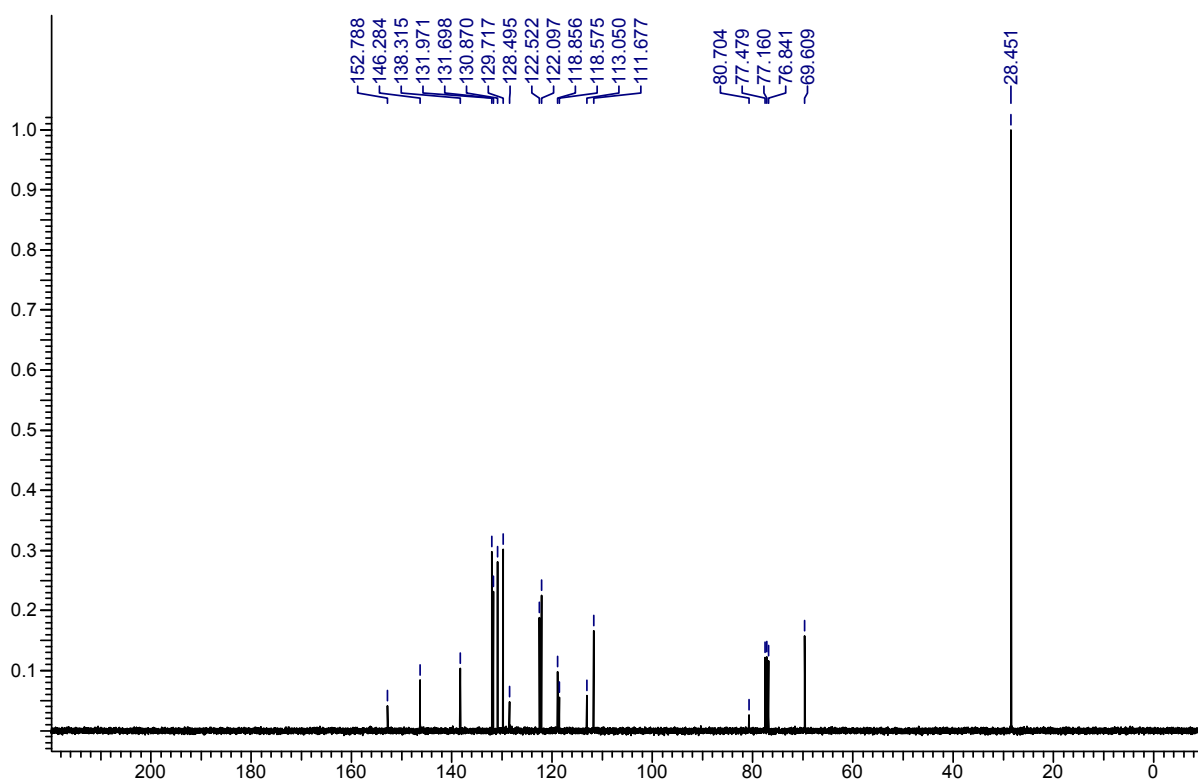

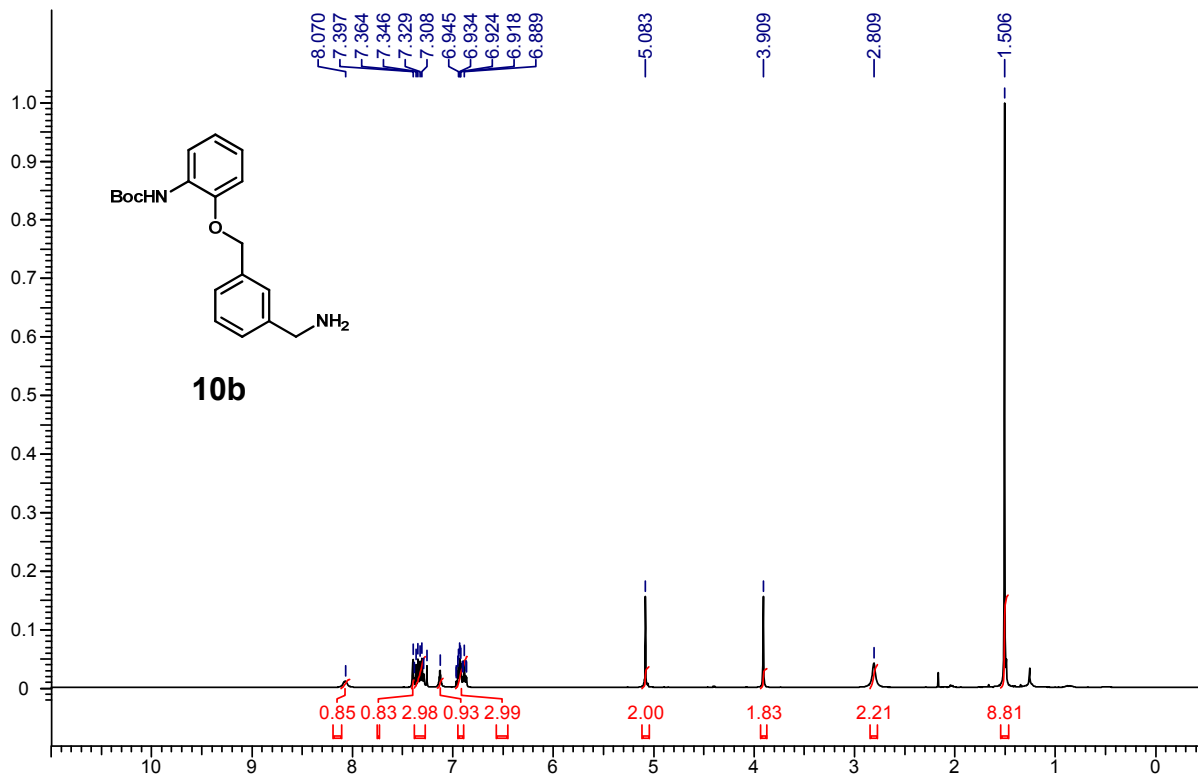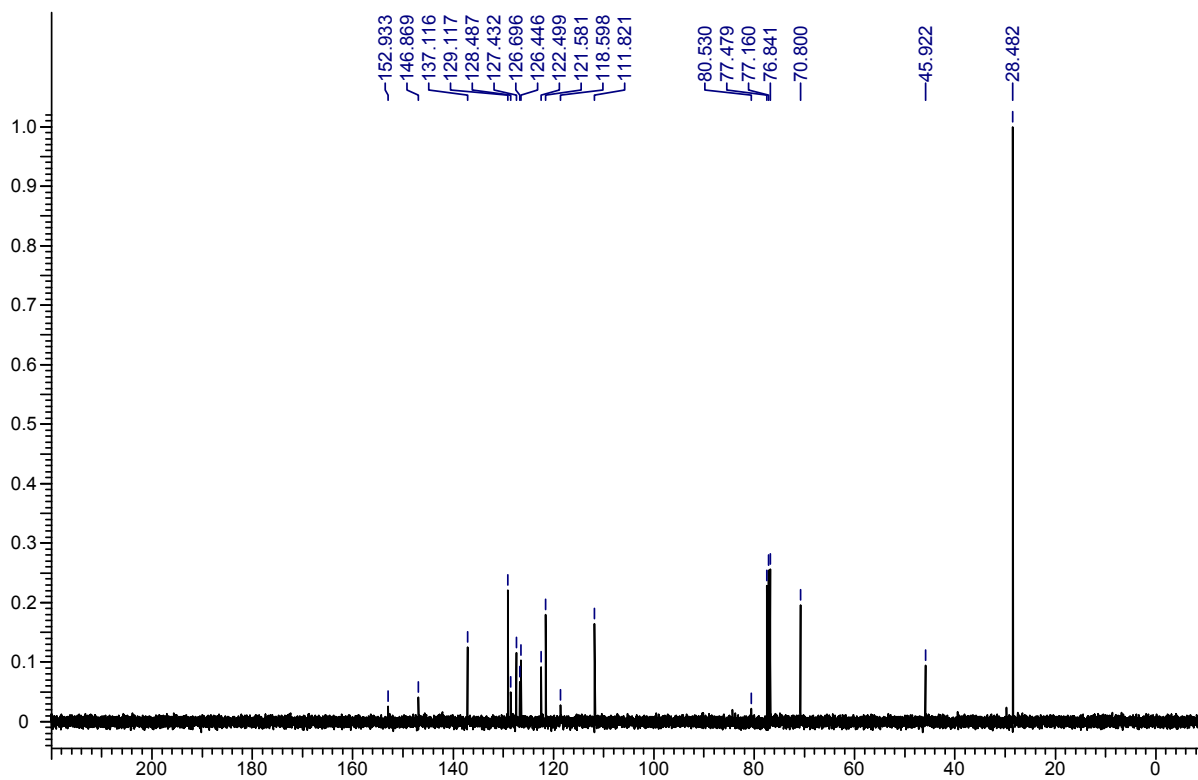

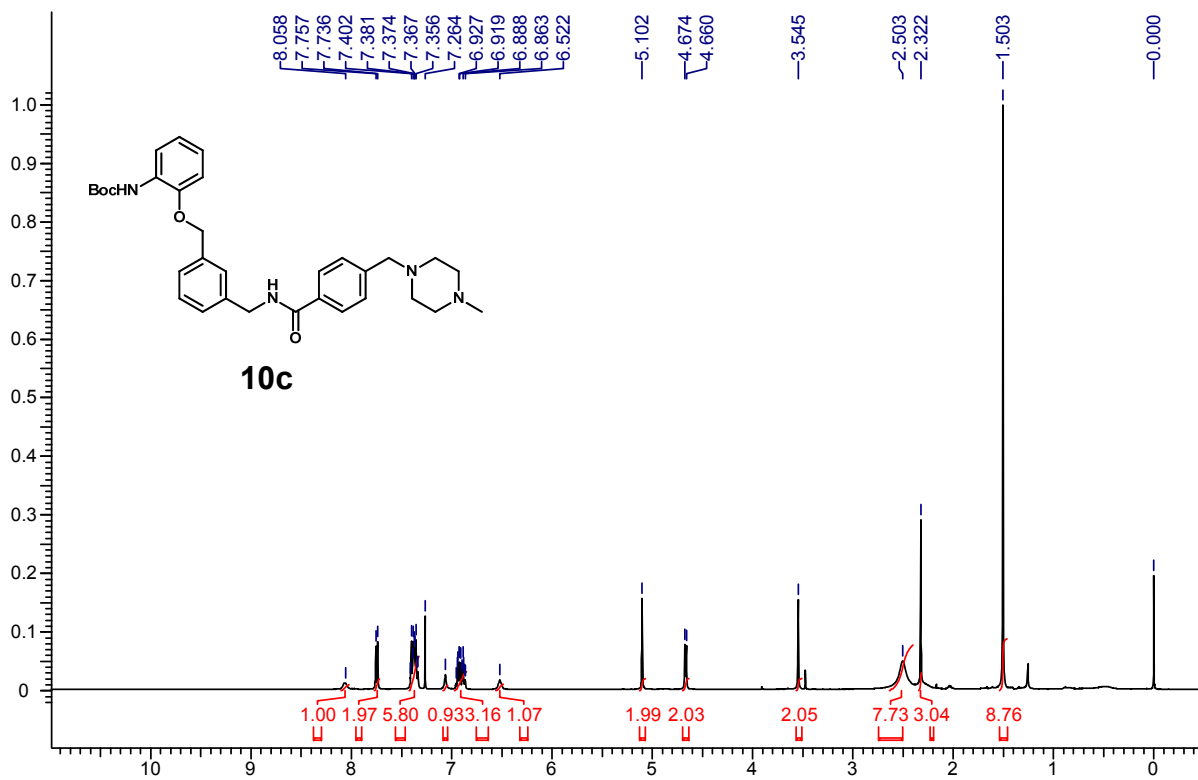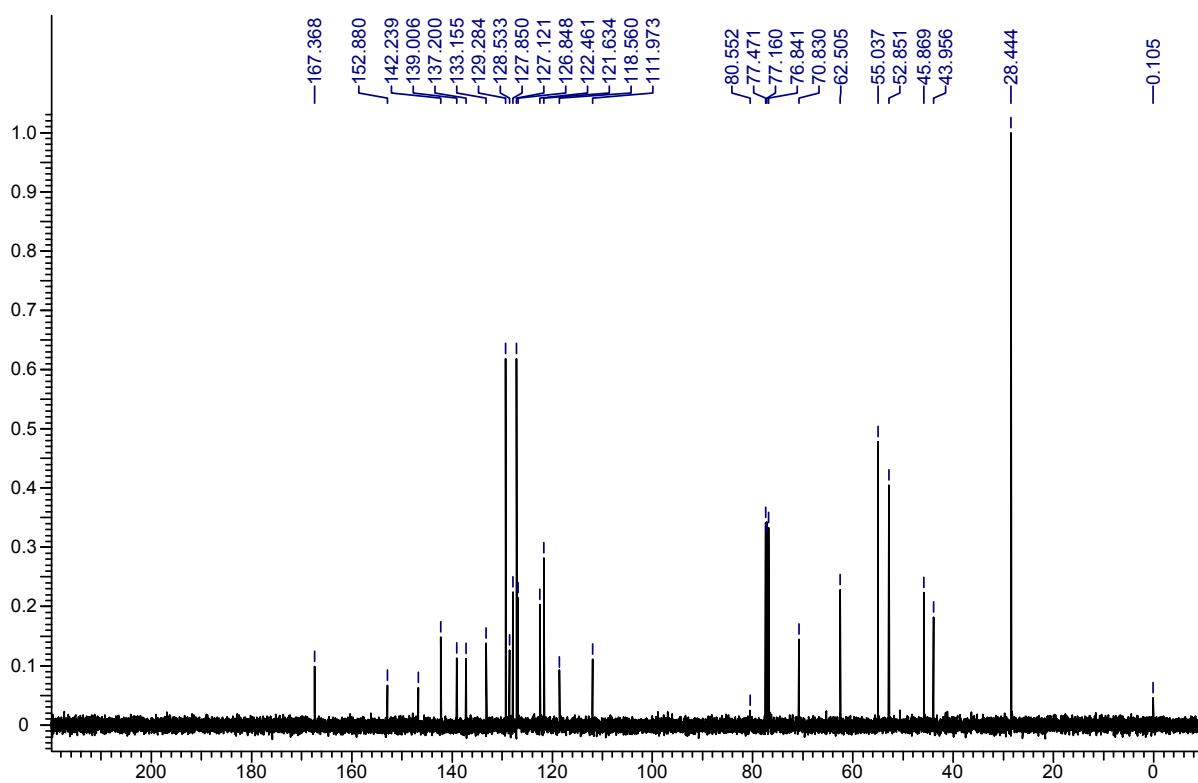

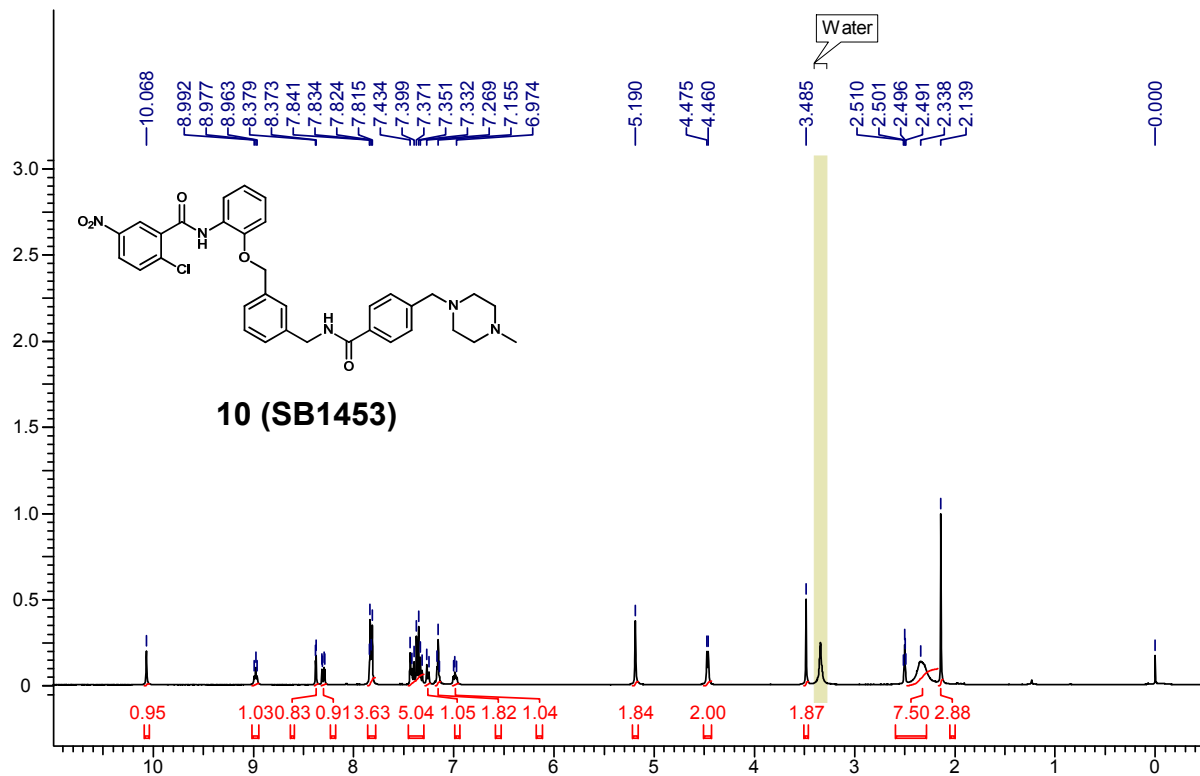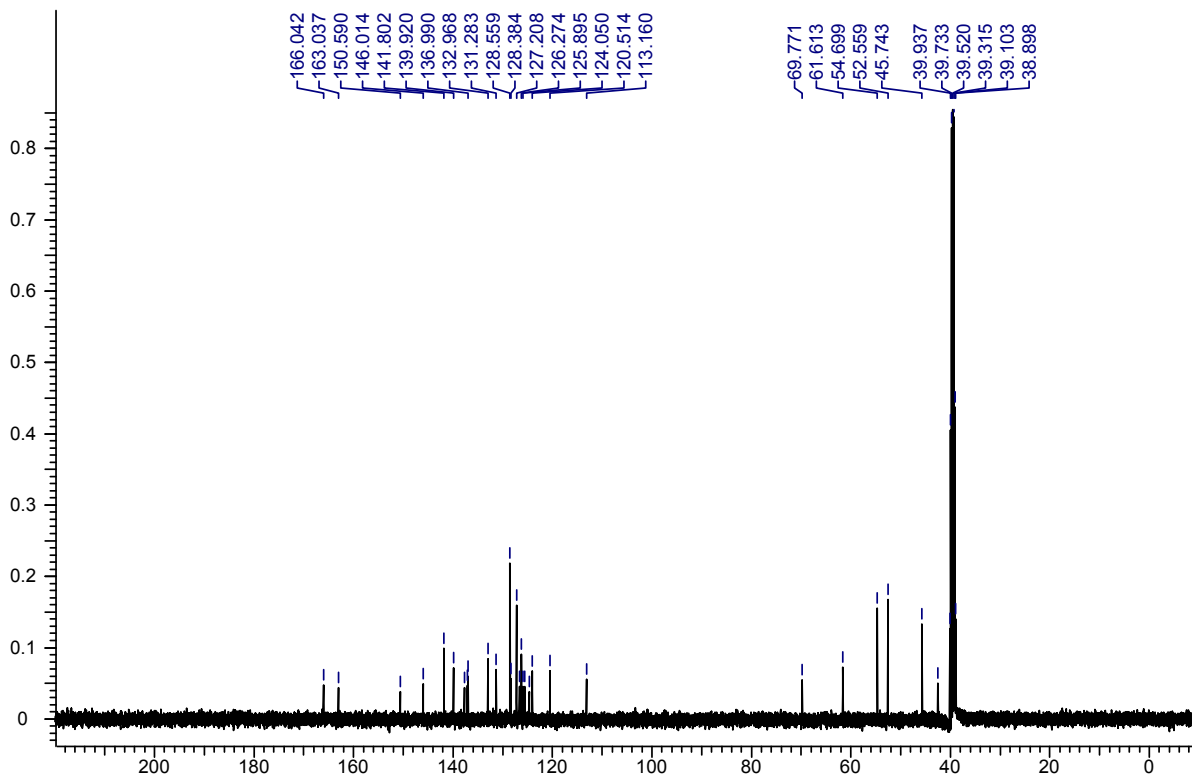

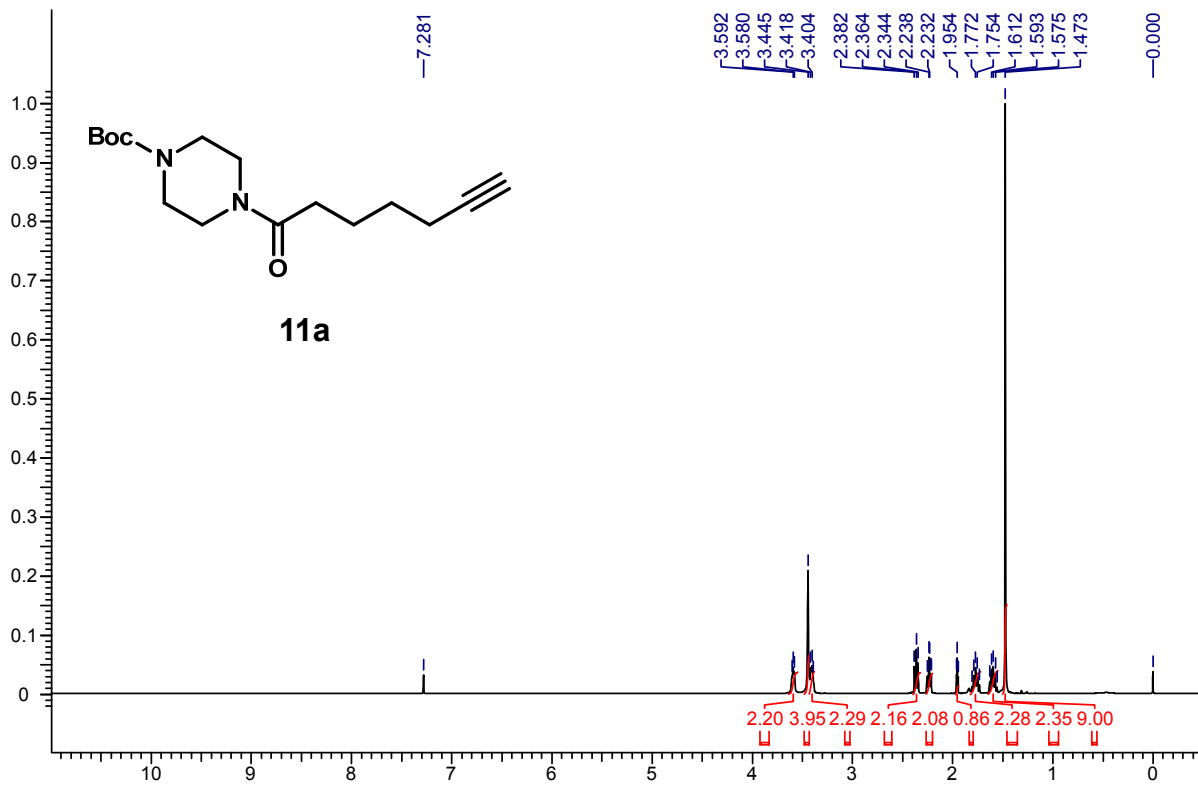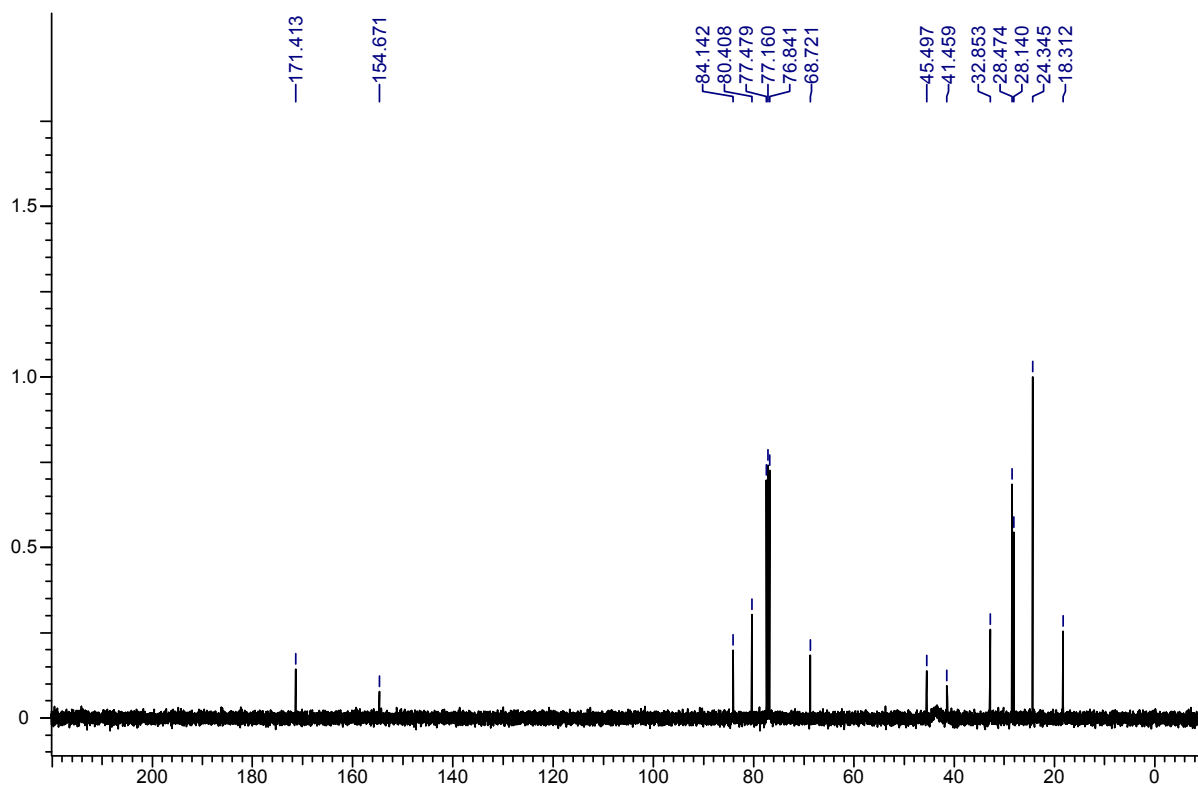



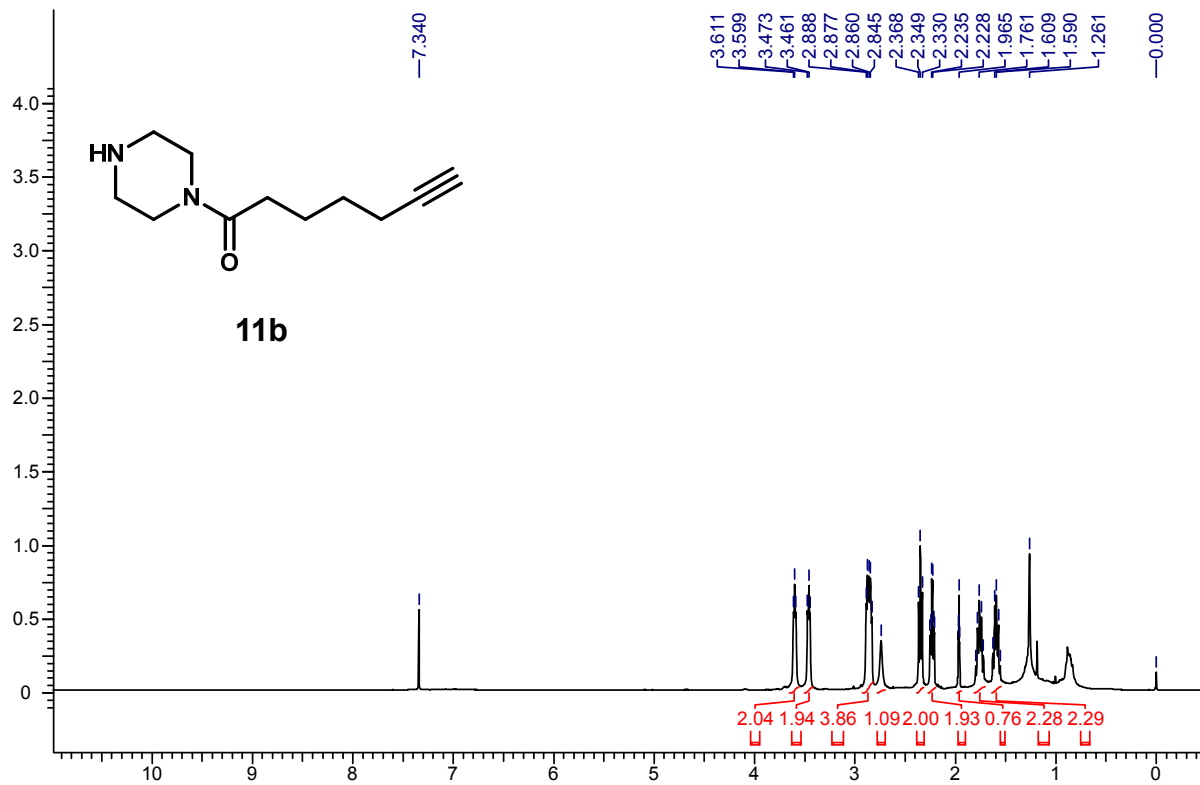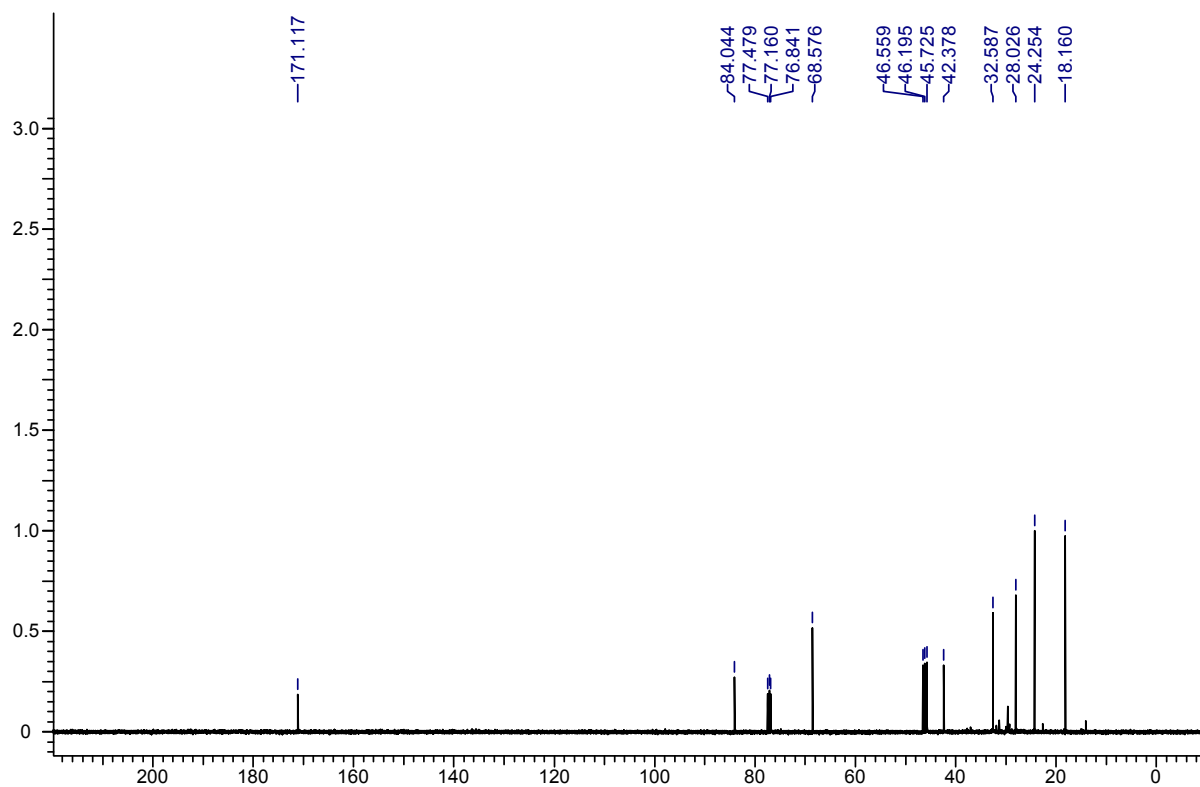

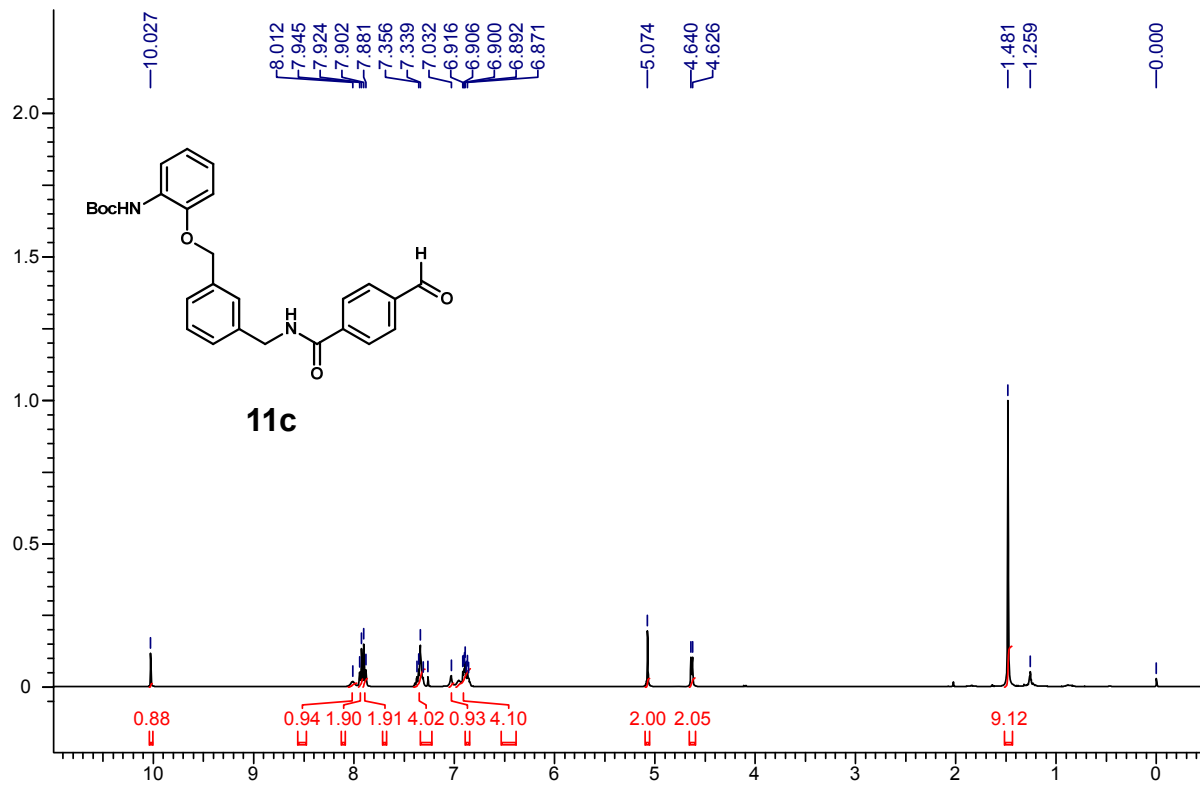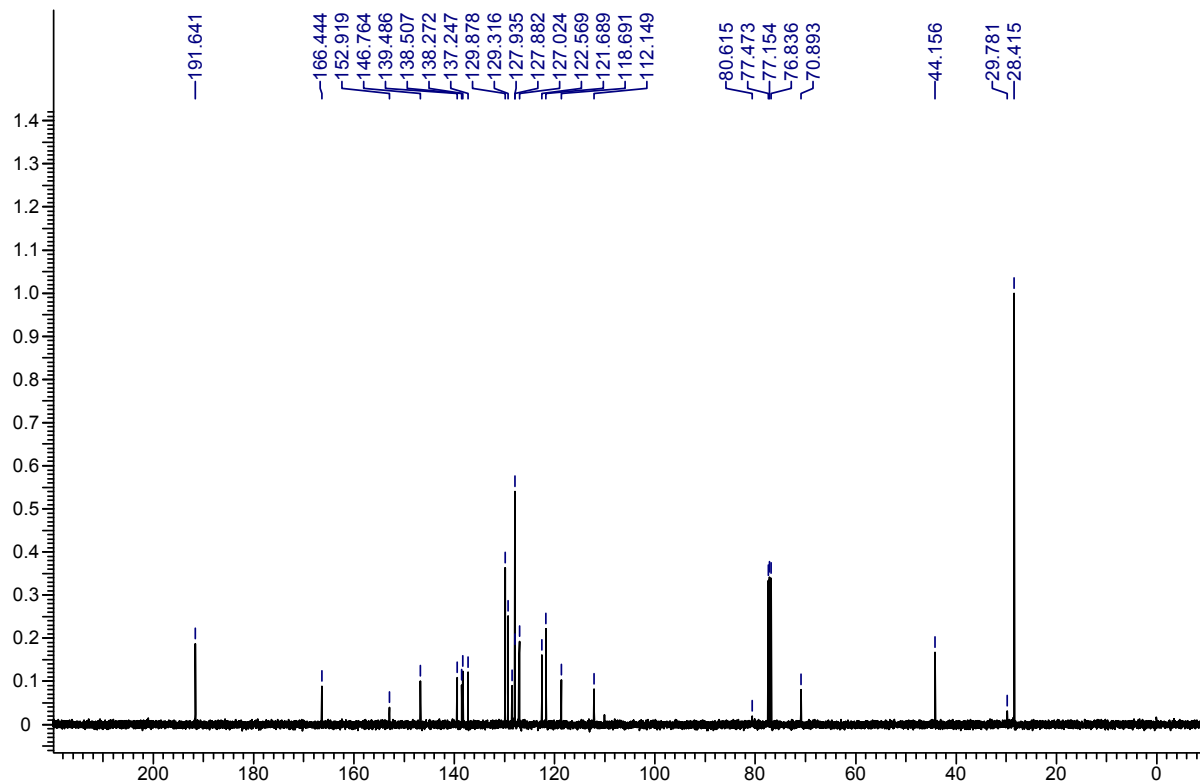

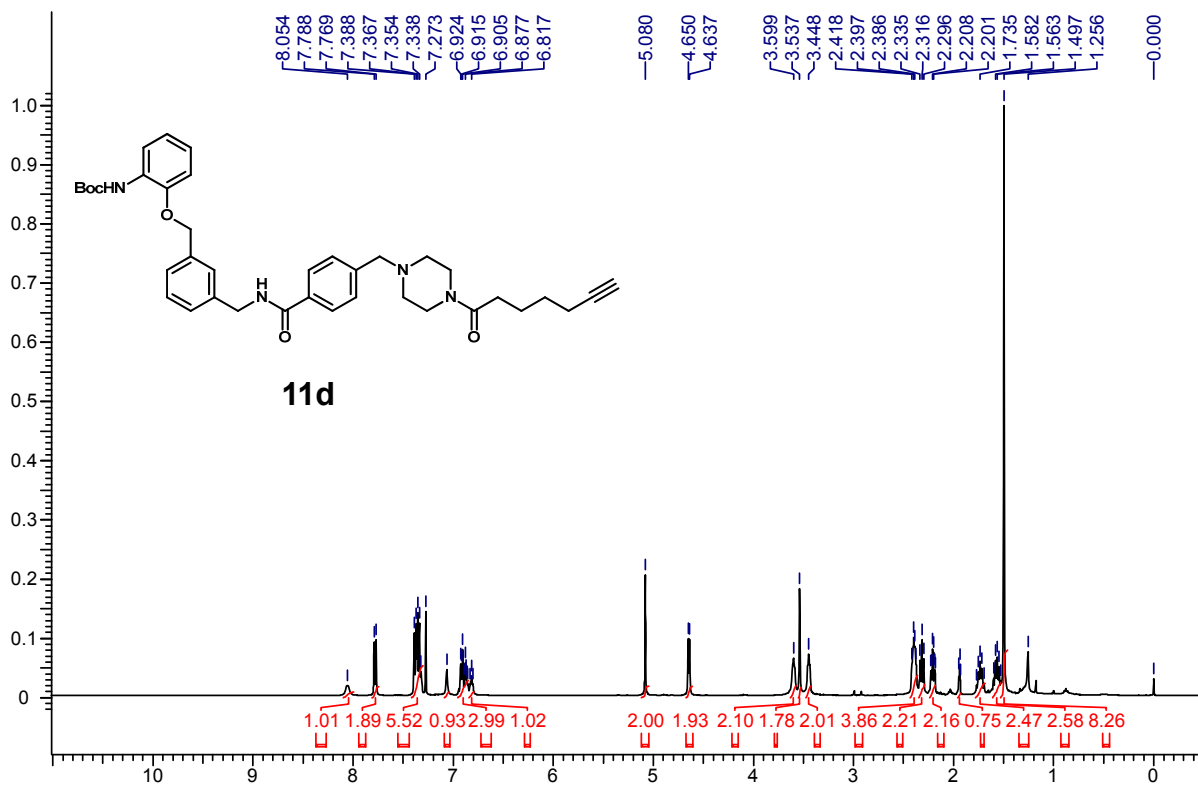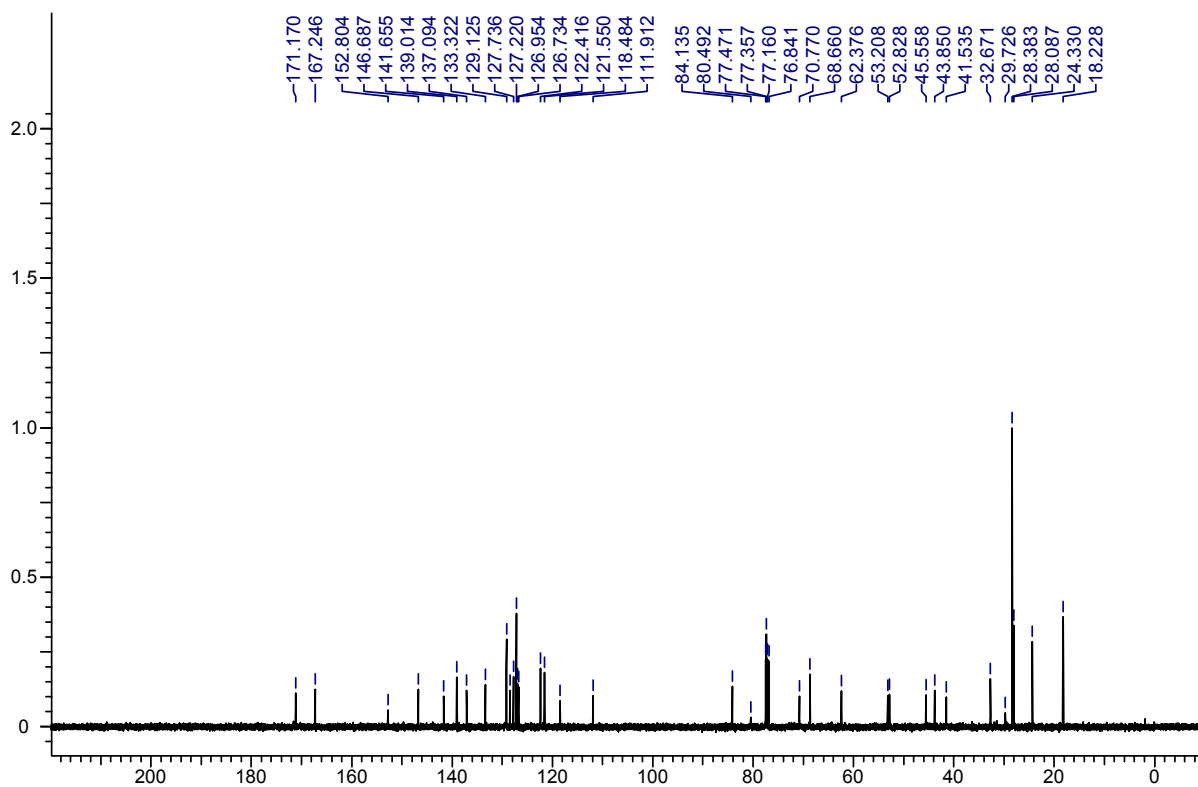

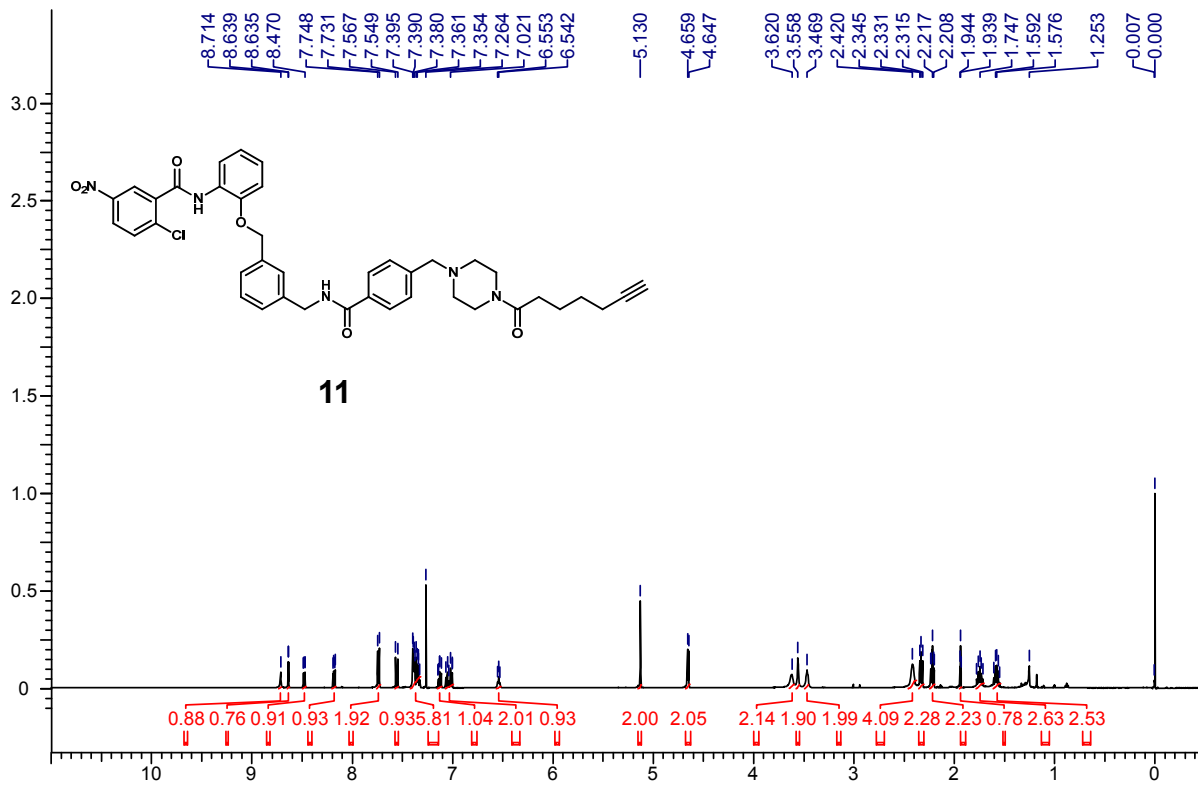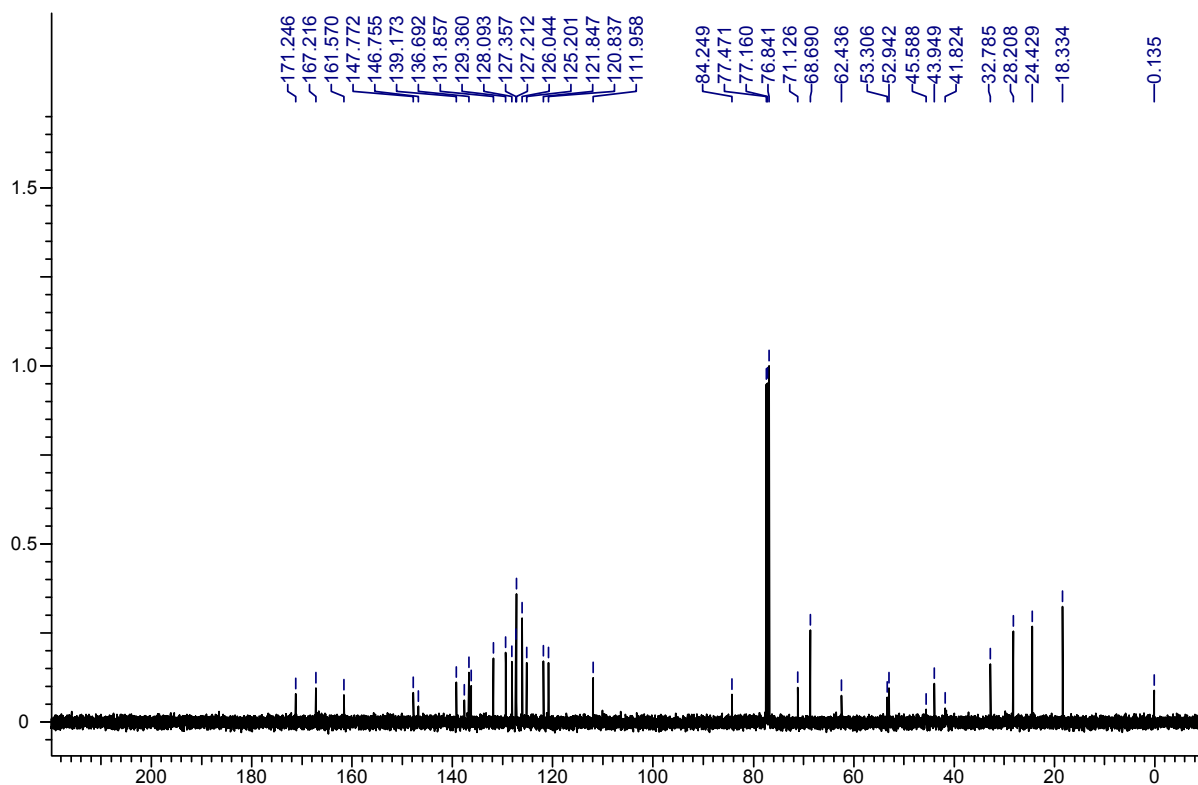

Supplement: SC-007-C6SC01279E-s002.pdf [file SC-007-C6SC01279E-s002.pdf]
